# Supplementary material for: Preparation of the Ru3(CO)8-pyridine-alcohol cluster and its use for the selective catalytic transformation of primary to secondary amines
Source: Royal Society of Chemistry journal article supplement (doi:10.1039/c8dt02972e), 2018-01-01
Supplement: c8dt02972e1.pdf [file c8dt02972e1.pdf]

## Electronic Supplementary Information

### **†Preparation of $\text{Ru}_3(\text{CO})_8$ -pyridine-alcohol cluster and its use for selective catalytic transformation of primary to secondary amines**

Ajeet Singh,<sup>a</sup> Shaikh M. Mobin<sup>\*,a,b,c</sup> and Pradeep Mathur<sup>\*,a</sup>

<sup>a</sup>Discipline of Chemistry, <sup>b</sup>Discipline for Biosciences and Bio-Medical Engineering, and <sup>c</sup>Discipline of Metallurgy Engineering and Materials Science, Indian Institute of Technology Indore, Simrol, Khandwa Road, Indore 453552, India

Email address: Shaikh M. Mobin (xray@iiti.ac.in) and Pradeep Mathur (director@iiti.ac.in)

**Content:**

|                                                                                            |              |
|--------------------------------------------------------------------------------------------|--------------|
| <b>Table S1.</b> Selected bond lengths (Å) and bond angles (°)                             | Page No. 5–6 |
| <b>Fig. S1.</b> Image of complexes <b>1–3</b> obtained after re-crystallizing from toluene | Page No. 7   |
| <b>Fig. S2.</b> <sup>1</sup> H NMR of <b>1</b>                                             | Page No. 8   |
| <b>Fig. S3.</b> <sup>1</sup> H NMR of <b>2</b>                                             | Page No. 9   |
| <b>Fig. S4.</b> <sup>1</sup> H NMR of <b>3</b>                                             | Page No. 10  |
| <b>Fig. S5.</b> <sup>13</sup> C NMR of <b>1</b>                                            | Page No. 11  |
| <b>Fig. S6.</b> <sup>13</sup> C NMR of <b>2</b>                                            | Page No. 12  |
| <b>Fig. S7.</b> <sup>13</sup> C NMR of <b>3</b>                                            | Page No. 13  |
| <b>Fig. S8.</b> LCMS spectrum of <b>1</b>                                                  | Page No. 14  |
| <b>Fig. S9.</b> LCMS spectrum of <b>2</b>                                                  | Page No. 15  |
| <b>Fig. S10.</b> LCMS spectrum of <b>3</b>                                                 | Page No. 16  |
| <b>Fig. S11.</b> IR of <b>1</b>                                                            | Page No. 17  |
| <b>Fig. S12.</b> IR of <b>2</b>                                                            | Page No. 18  |
| <b>Fig. S13.</b> IR of <b>3</b>                                                            | Page No. 19  |
| <b>Fig. S14.</b> 1D polymeric chain of complex <b>1</b>                                    | Page No. 20  |
| <b>Fig. S15.</b> 1D polymeric chain of complex <b>2</b>                                    | Page No. 21  |
| <b>Fig. S16.</b> 1D polymeric chain of complex <b>3</b>                                    | Page No. 21  |
| <b>Fig. S17.</b> Seven-members ring in complex <b>2</b> involving C13–C16, O2, N2, Ru2     | Page No. 22  |
| <b>Fig. S18.</b> Hydrogen bonding in <b>3</b> between H2A···O4 with distance 2.035 Å       | Page No. 22  |
| <b>Table S2.</b> Symmetry operators present in complex <b>1</b>                            | Page No. 23  |
| <b>Table S3.</b> Symmetry operators present in complex <b>2</b>                            | Page No. 24  |
| <b>Table S4.</b> Symmetry operators present in complex <b>3</b>                            | Page No. 25  |
| <b>Fig. S19.</b> Symmetry operators present in <b>1</b>                                    | Page No. 26  |
| <b>Fig. S20.</b> Symmetry operators present in <b>2</b>                                    | Page No. 27  |
| <b>Fig. S21.</b> Symmetry operators present in <b>3</b>                                    | Page No. 28  |
| <b>Fig. S22.</b> 2D network of <b>1</b> along tilted c-axis                                | Page No. 29  |
| <b>Fig. S23.</b> 3D network of <b>1</b> along b-axis                                       | Page No. 30  |

|                                                                              |             |
|------------------------------------------------------------------------------|-------------|
| <b>Fig. S24.</b> 2D network of <b>2</b> along c-axis                         | Page No. 31 |
| <b>Fig. S25.</b> 3D network of <b>2</b> along tilted a-axis                  | Page No. 32 |
| <b>Fig. S26.</b> 2D network of <b>3</b> along b-axis                         | Page No. 33 |
| <b>Fig. S27.</b> 3D network of <b>3</b> along tilted a-axis                  | Page No. 34 |
| <b>Fig. S28.</b> GCMS of table 3, entry no. 3 (chromatogram and mass peaks)  | Page No. 35 |
| <b>Fig. S29.</b> GCMS of table 3, entry no. 4 (chromatogram and mass peaks)  | Page No. 36 |
| <b>Fig. S30.</b> GCMS of table 3, entry no. 5 (chromatogram and mass peaks)  | Page No. 37 |
| <b>Fig. S31.</b> GCMS of table 3, entry no. 6 (chromatogram and mass peaks)  | Page No. 38 |
| <b>Fig. S32.</b> GCMS of table 3, entry no. 7 (chromatogram and mass peaks)  | Page No. 39 |
| <b>Fig. S33.</b> GCMS of table 3, entry no. 8 (chromatogram and mass peaks)  | Page No. 40 |
| <b>Fig. S34.</b> GCMS of table 3, entry no. 9 (chromatogram and mass peaks)  | Page No. 41 |
| <b>Fig. S35.</b> GCMS of table 4, entry no. 2 (chromatogram and mass peaks)  | Page No. 42 |
| <b>Fig. S36.</b> GCMS of table 4, entry no. 3 (chromatogram and mass peaks)  | Page No. 43 |
| <b>Fig. S37.</b> GCMS of table 4, entry no. 4 (chromatogram and mass peaks)  | Page No. 44 |
| <b>Fig. S38.</b> GCMS of table 4, entry no. 5 (chromatogram and mass peaks)  | Page No. 45 |
| <b>Fig. S39.</b> GCMS of table 4, entry no. 6 (chromatogram and mass peaks)  | Page No. 46 |
| <b>Fig. S40.</b> GCMS of table 4, entry no. 7 (chromatogram and mass peaks)  | Page No. 47 |
| <b>Fig. S41.</b> GCMS of table 4, entry no. 8 (chromatogram and mass peaks)  | Page No. 48 |
| <b>Fig. S42.</b> GCMS of table 4, entry no. 11 (chromatogram and mass peaks) | Page No. 49 |
| <b>Fig. S43.</b> GCMS of table 4, entry no. 12 (chromatogram and mass peaks) | Page No. 50 |
| <b>Fig. S44.</b> GCMS of table 4, entry no. 13 (chromatogram and mass peaks) | Page No. 51 |
| <b>Fig. S45.</b> GCMS of table 4, entry no. 14 (chromatogram and mass peaks) | Page No. 52 |
| <b>Fig. S46.</b> GCMS of table 4, entry no. 15 (chromatogram and mass peaks) | Page No. 53 |
| <b>Fig. S47.</b> GCMS of table 4, entry no. 16 (chromatogram and mass peaks) | Page No. 54 |
| <b>Fig. S48.</b> GCMS of table 4, entry no. 17 (chromatogram and mass peaks) | Page No. 55 |
| <b>Fig. S49.</b> GCMS of table 4, entry no. 18 (chromatogram and mass peaks) | Page No. 56 |
| <b>Fig. S50.</b> GCMS of table 4, entry no. 19 (chromatogram and mass peaks) | Page No. 57 |
| <b>Fig. S51.</b> GCMS of table 4, entry no. 20 (chromatogram and mass peaks) | Page No. 58 |
| <b>Fig. S52.</b> GCMS of table 5, entry no. 1 (chromatogram and mass peaks)  | Page No. 59 |

|                                                                                                                |             |
|----------------------------------------------------------------------------------------------------------------|-------------|
| <b>Fig. S53.</b> GCMS of table 5, entry no. 2 (chromatogram and mass peaks)                                    | Page No. 60 |
| <b>Fig. S54.</b> GCMS of table 5, entry no. 3 (chromatogram and mass peaks)                                    | Page No. 61 |
| <b>Fig. S55.</b> GCMS of table 5, entry no. 4 (chromatogram and mass peaks)                                    | Page No. 62 |
| <b>Fig. S56.</b> GCMS of table 5, entry no. 5 (chromatogram and mass peaks)                                    | Page No. 63 |
| <b>Fig. S57.</b> GCMS of table 5, entry no. 6 (chromatogram and mass peaks)                                    | Page No. 64 |
| <b>Fig. S58.</b> GCMS of table 5, entry no. 7 (chromatogram and mass peaks)                                    | Page No. 65 |
| <b>Fig. S59.</b> GCMS of table 5, entry no. 8 (chromatogram and mass peaks)                                    | Page No. 66 |
| <b>Fig. S60.</b> <sup>1</sup> H NMR of N-benzyl-1-(pyridin-2-yl)methanamine (Table 6, entry 1)                 | Page No. 67 |
| <b>Fig. S61.</b> <sup>13</sup> C NMR of N-benzyl-1-(pyridin-2-yl)methanamine (Table 6, entry 1)                | Page No. 68 |
| <b>Fig. S62.</b> <sup>1</sup> H NMR of o-toluidine (Table 6, entry 4)                                          | Page No. 69 |
| <b>Fig. S63.</b> <sup>13</sup> C NMR of o-toluidine (Table 6, entry 4)                                         | Page No. 70 |
| <b>Fig. S64.</b> <sup>1</sup> H NMR of p-toluidine (Table 6, entry 7)                                          | Page No. 71 |
| <b>Fig. S65.</b> <sup>13</sup> C NMR of p-toluidine (Table 6, entry 7)                                         | Page No. 72 |
| <b>Fig. S66.</b> <sup>1</sup> H NMR of N-(pyridin-2-ylmethyl)pyridin-4-amine (Table 6, entry 11)               | Page No. 73 |
| <b>Fig. S67.</b> <sup>13</sup> C NMR of N-(pyridin-2-ylmethyl)pyridin-4-amine (Table 6, entry 11)              | Page No. 74 |
| <b>Fig. S68.</b> <sup>1</sup> H NMR of N-benzyl-2,4,6-trimethoxyaniline (Table 4, entry 20)                    | Page No. 75 |
| <b>Fig. S69.</b> <sup>13</sup> C NMR of N-benzyl-2,4,6-trimethoxyaniline (Table 4, entry 20)                   | Page No. 76 |
| <b>Fig. S70.</b> <sup>1</sup> H NMR of bis(pyridin-2-ylmethyl)amine (Table 7, entry 1)                         | Page No. 77 |
| <b>Fig. S71.</b> <sup>13</sup> C NMR of bis(pyridin-2-ylmethyl)amine (Table 7, entry 1)                        | Page No. 78 |
| <b>Fig. S72.</b> <sup>1</sup> H NMR of N-(4-isopropylbenzyl)-1-(pyridin-2-yl)methanamine (Table 7, entry 5)    | Page No. 79 |
| <b>Fig. S73.</b> <sup>13</sup> C NMR of N-(4-isopropylbenzyl)-1-(pyridin-2-yl)methanamine (Table 7, entry 5)   | Page No. 80 |
| <b>Fig. S74.</b> Mercury Poisoning experiment of the standard reaction between benzyl alcohol and picolylamine | Page No. 81 |
| X-Ray crystallography experimental details and references                                                      | Page No. 82 |
| <b>Fig. S75.</b> Perspective view of <b>1a</b>                                                                 | Page No. 83 |
| <b>Table S5</b> Crystal data and structure refinement for <b>1a</b>                                            | Page No. 84 |
| References                                                                                                     | Page No. 85 |

**Table S1.** Selected bond lengths (Å) and bond angles (°)

| <b>Bond Lengths for 1</b> |      |            |  |      |      |           |
|---------------------------|------|------------|--|------|------|-----------|
| Atom                      | Atom | Length/ Å  |  | Atom | Atom | Length/ Å |
| Ru1                       | Ru2  | 3.0697(3)  |  | Ru1  | N1   | 2.211(2)  |
| Ru1                       | Ru3  | 2.8130(3)  |  | Ru1  | C16  | 1.860(3)  |
| Ru2                       | C18  | 1.860(3)   |  | Ru1  | C15  | 1.854(3)  |
| Ru2                       | Ru3  | 2.8147(3)  |  | O1   | C7   | 1.422(3)  |
| Ru1                       | O1   | 2.1178(16) |  | O4   | C16  | 1.159(3)  |
| Ru1                       | O2   | 2.1558(16) |  |      |      |           |

| <b>Bond Angles for 1</b> |      |      |           |      |      |      |           |
|--------------------------|------|------|-----------|------|------|------|-----------|
| Atom                     | Atom | Atom | Angle/ °  | Atom | Atom | Atom | Angle/ °  |
| Ru3                      | Ru1  | Ru2  | 56.972(7) | N1   | Ru1  | Ru2  | 113.08(5) |
| O1                       | Ru1  | Ru2  | 44.15(5)  | O2   | Ru1  | Ru3  | 82.35(5)  |

| <b>Bond Lengths for 2</b> |      |           |  |      |      |           |
|---------------------------|------|-----------|--|------|------|-----------|
| Atom                      | Atom | Length/ Å |  | Atom | Atom | Length/ Å |
| Ru2                       | Ru1  | 3.0307(4) |  | Ru1  | O1   | 2.096(3)  |
| Ru2                       | Ru3  | 2.7919(5) |  | Ru1  | N1   | 2.243(4)  |
| Ru2                       | O2   | 2.104(3)  |  | Ru1  | C17  | 1.845(5)  |
| Ru2                       | O1   | 2.116(3)  |  | Ru1  | C18  | 1.838(4)  |
| Ru2                       | N2   | 2.251(3)  |  | Ru3  | C23  | 1.940(5)  |
| Ru2                       | C19  | 1.840(5)  |  | Ru3  | C21  | 1.936(5)  |
| Ru2                       | C20  | 1.840(5)  |  | Ru3  | C24  | 1.910(6)  |
| Ru1                       | Ru3  | 2.8038(5) |  | Ru3  | C22  | 1.928(6)  |
| Ru1                       | O2   | 2.112(3)  |  |      |      |           |

| <b>Bond Angles for 2</b> |      |      |            |      |      |      |            |
|--------------------------|------|------|------------|------|------|------|------------|
| Atom                     | Atom | Atom | Angle/ °   | Atom | Atom | Atom | Angle/ °   |
| Ru3                      | Ru2  | Ru1  | 57.398(13) | N1   | Ru1  | Ru2  | 110.35(10) |
| O2                       | Ru2  | Ru1  | 44.14(8)   | N1   | Ru1  | Ru3  | 167.29(10) |
| O2                       | Ru2  | Ru3  | 85.19(8)   |      |      |      |            |

| <b>Bond Lengths for 3</b> |      |           |  |      |      |           |
|---------------------------|------|-----------|--|------|------|-----------|
| Atom                      | Atom | Length/ Å |  | Atom | Atom | Length/ Å |

|     |     |            |  |     |     |           |
|-----|-----|------------|--|-----|-----|-----------|
| Ru1 | Ru2 | 3.0448(9)  |  | Ru2 | N2  | 2.239(6)  |
| Ru1 | Ru3 | 2.7808(9)  |  | Ru2 | C17 | 1.845(10) |
| Ru1 | O1  | 2.084(5)   |  | Ru2 | C18 | 1.830(9)  |
| Ru1 | O3  | 2.135(5)   |  | Ru3 | C19 | 1.942(10) |
| Ru1 | N1  | 2.215(6)   |  | Ru3 | C22 | 1.921(11) |
| Ru1 | C16 | 1.858(10)  |  | Ru3 | C20 | 1.912(10) |
| Ru1 | C15 | 1.823(9)   |  | Ru3 | C21 | 1.937(10) |
| Ru2 | Ru3 | 2.7651(10) |  | O1  | C6  | 1.412(8)  |
| Ru2 | O1  | 2.140(5)   |  | O3  | C13 | 1.410(8)  |
| Ru2 | O3  | 2.081(5)   |  | Ru2 | N2  | 2.239(6)  |

| <b>Bond Angles for 3</b> |      |      |           |      |      |      |            |
|--------------------------|------|------|-----------|------|------|------|------------|
| Atom                     | Atom | Atom | Angle/°   | Atom | Atom | Atom | Angle/°    |
| Ru3                      | Ru1  | Ru2  | 56.45(2)  | N1   | Ru1  | Ru2  | 101.03(18) |
| O1                       | Ru1  | Ru2  | 44.61(13) | N1   | Ru1  | Ru3  | 156.97(19) |
| O1                       | Ru1  | Ru3  | 81.62(13) |      |      |      |            |

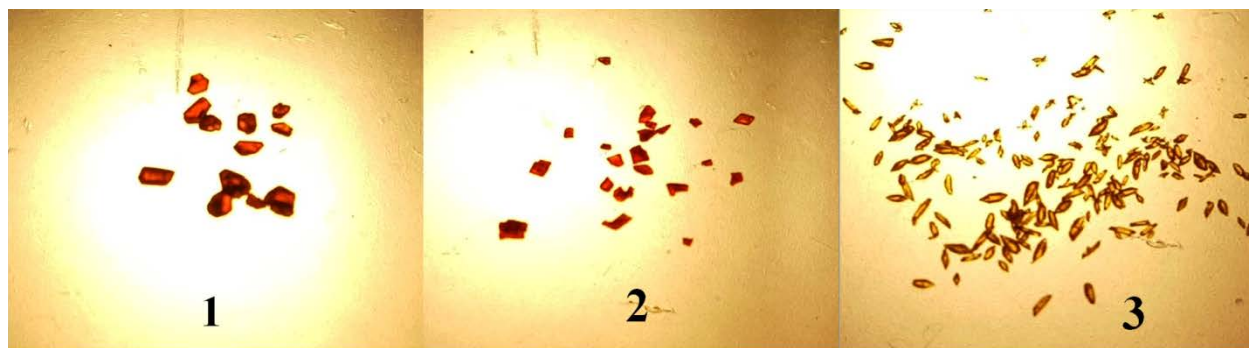

**Fig. S1.** Image of complexes **1–3** obtained after re-crystallizing from toluene

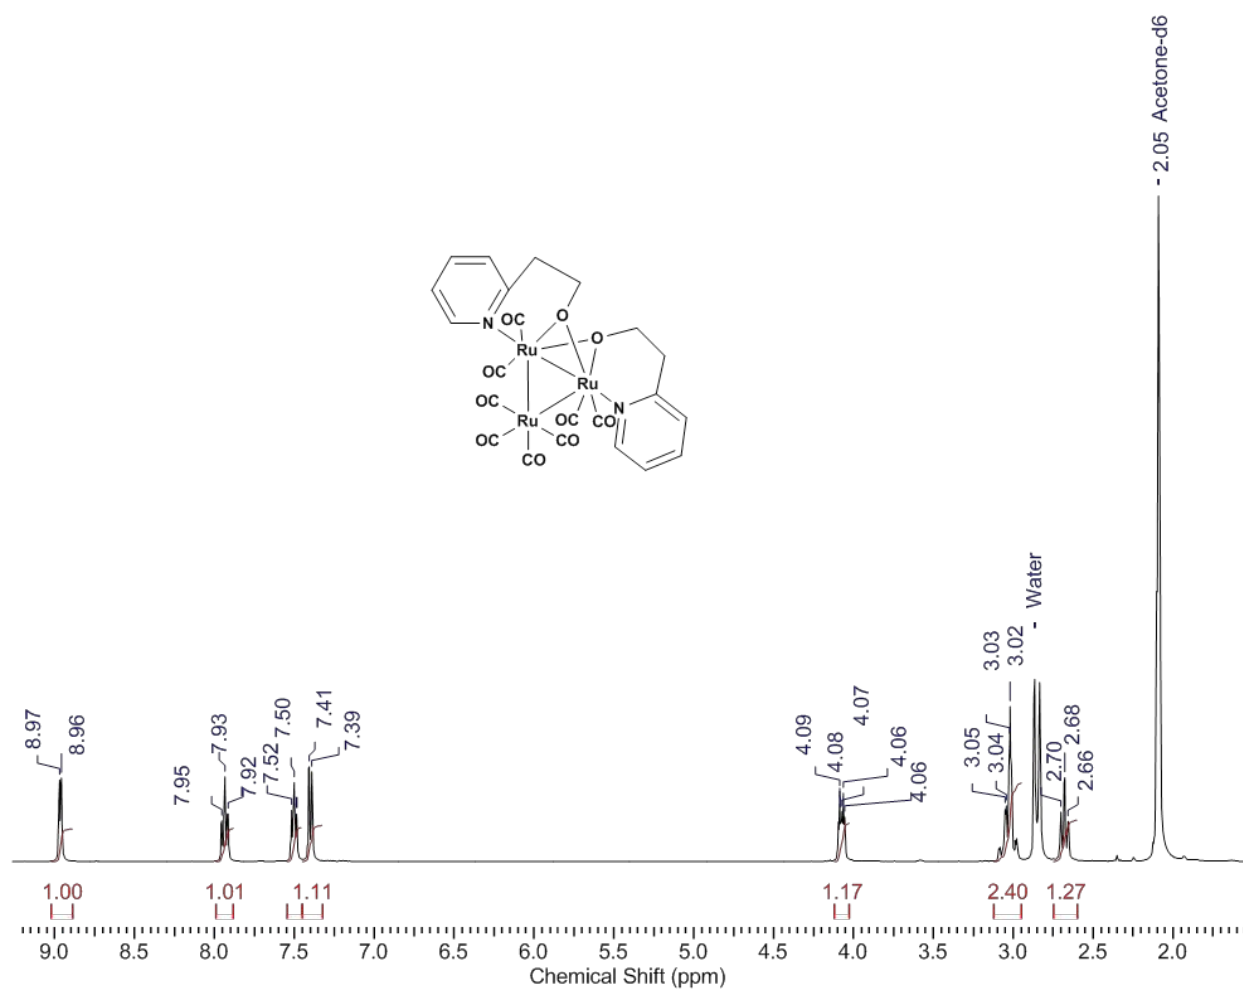

**Fig. S2.**  $^1\text{H}$  NMR of **1**



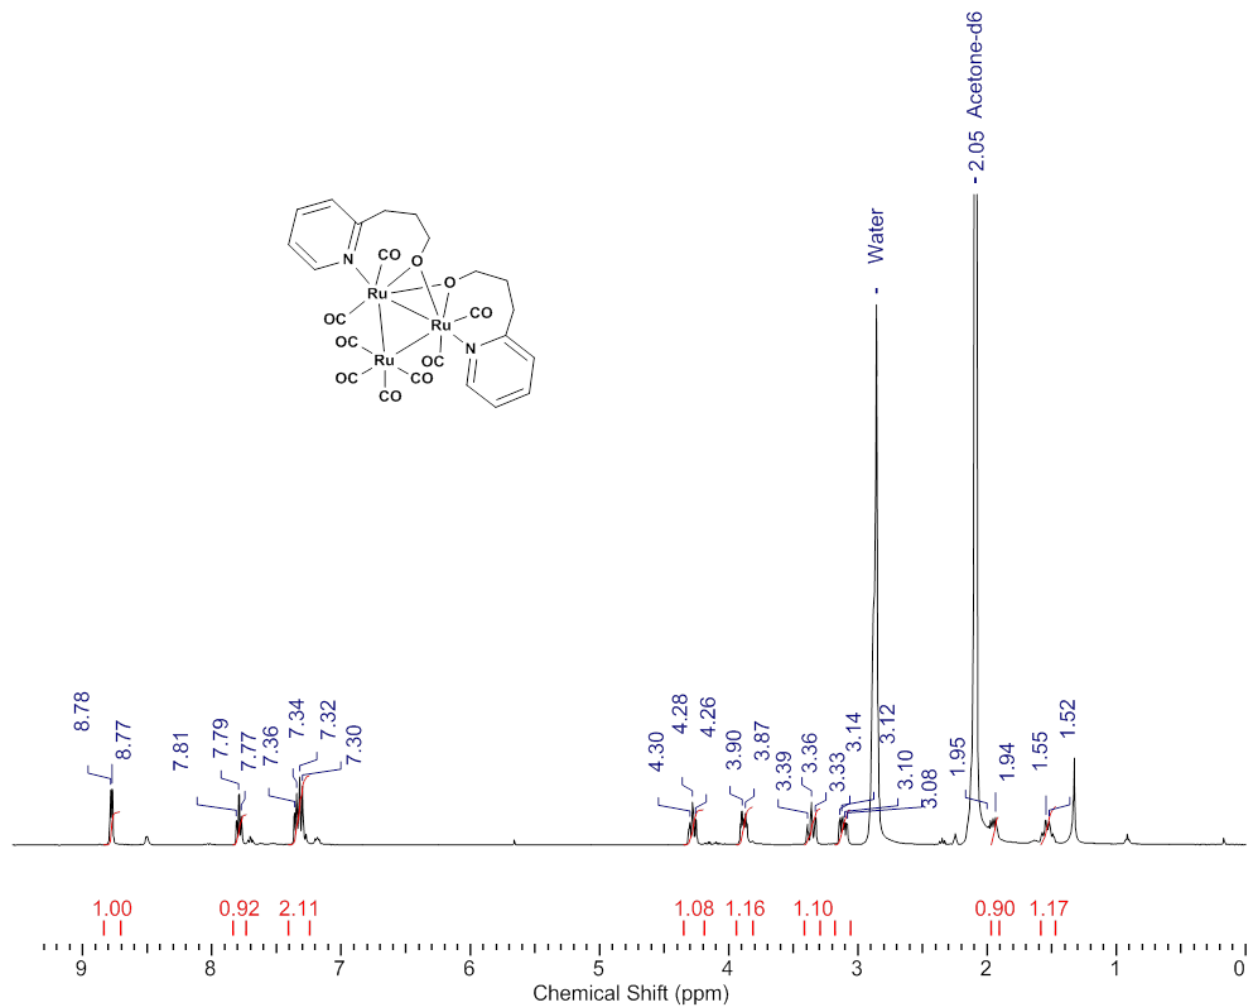

**Fig. S3.**  $^1\text{H}$  NMR of **2**

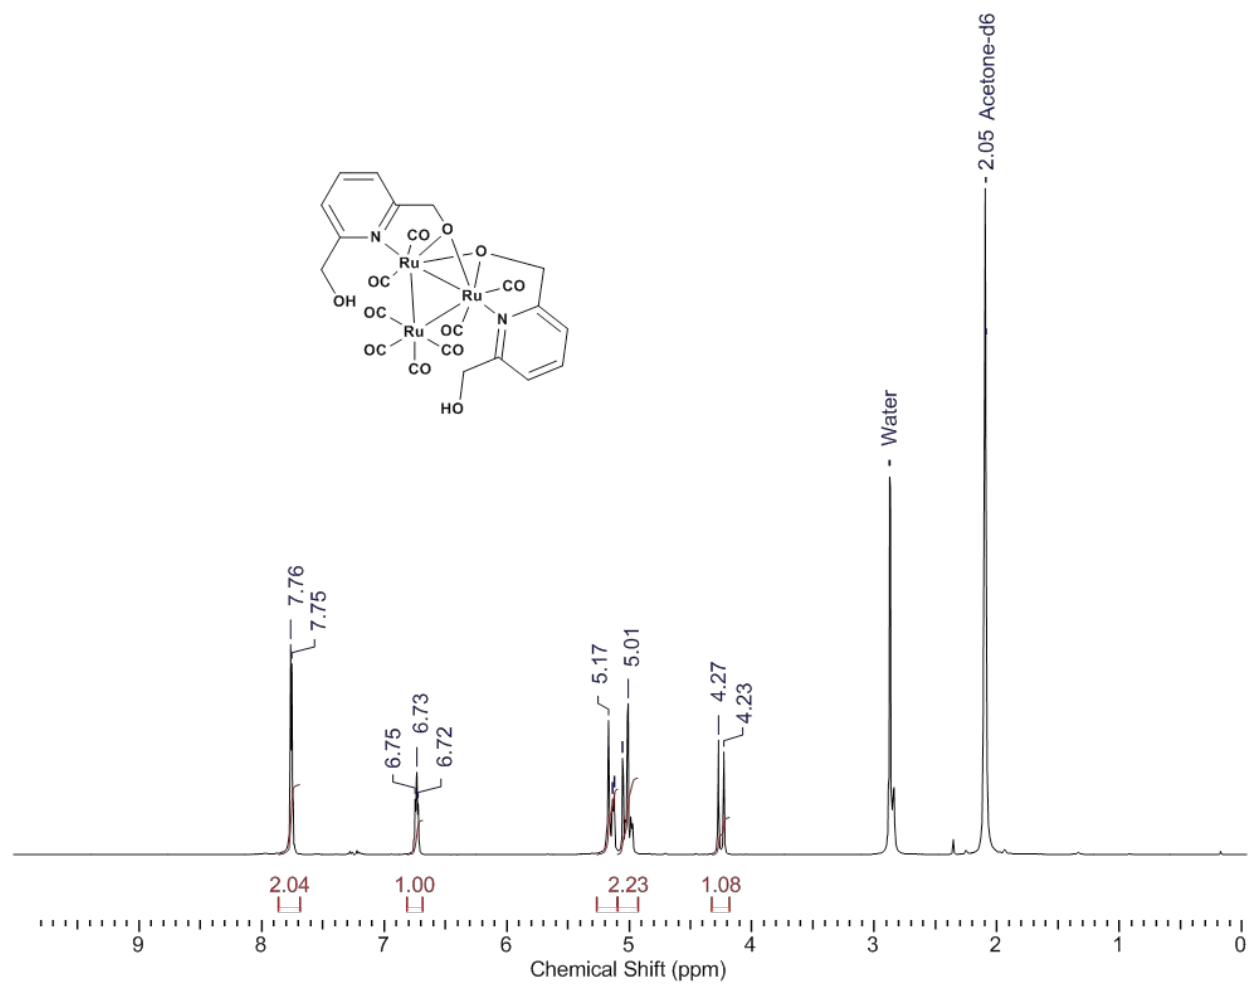

**Fig. S4.** <sup>1</sup>H NMR of **3**

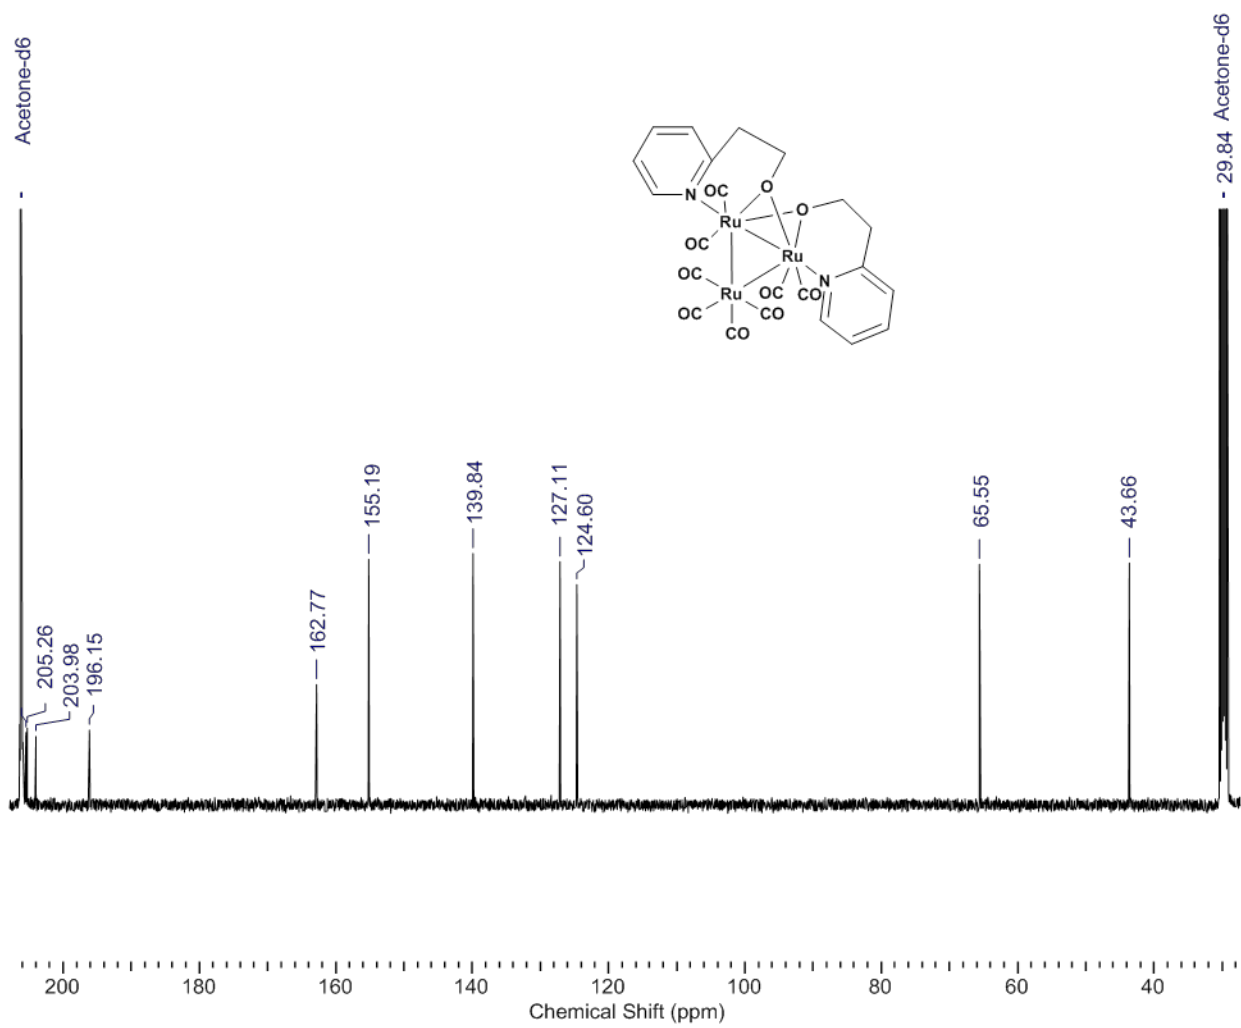

Fig. S5.  $^{13}\text{C}$  NMR of 1

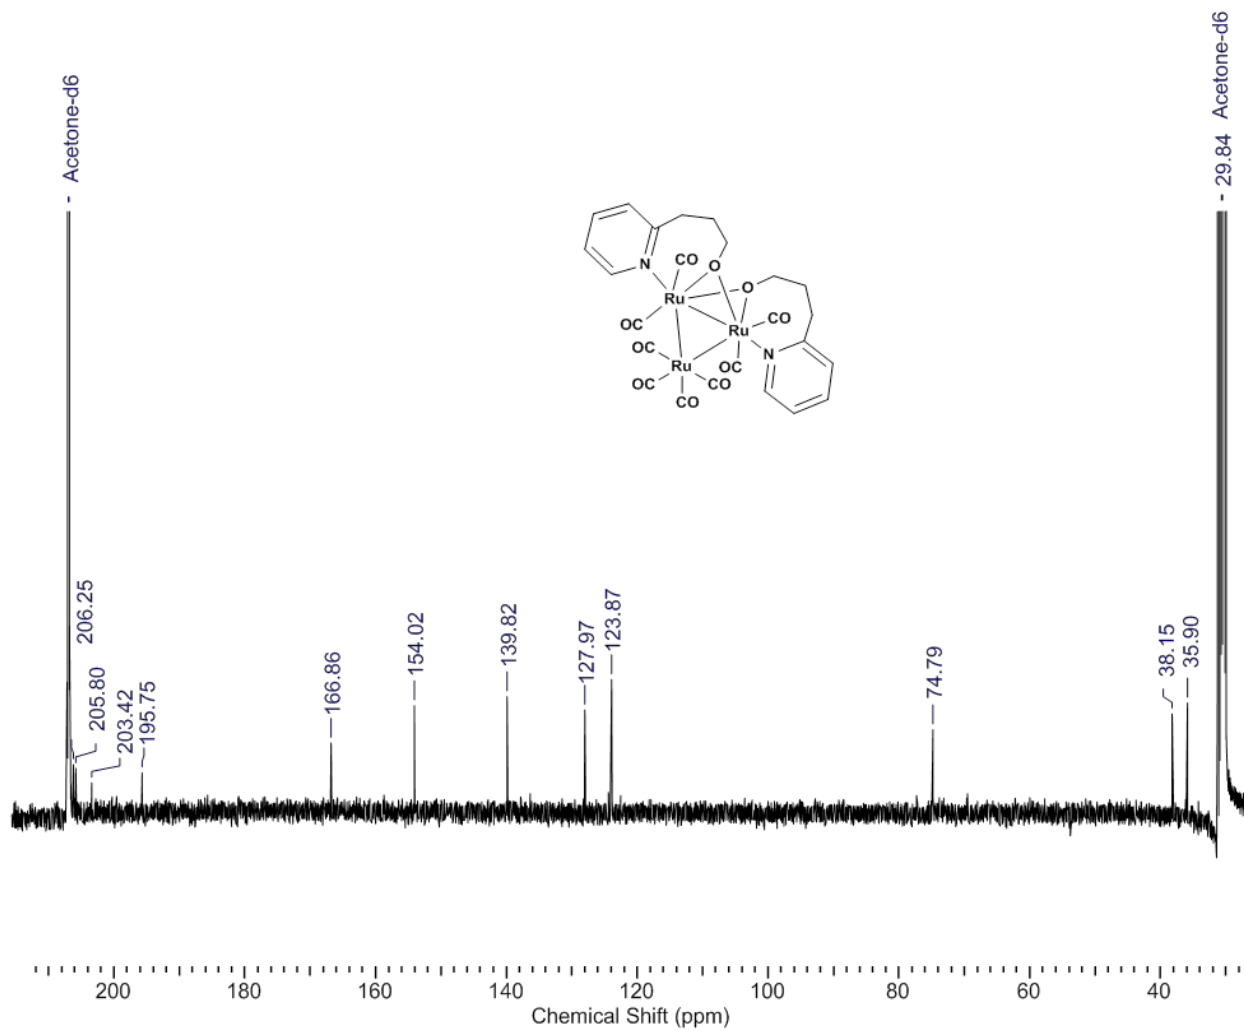

**Fig. S6.**  $^{13}\text{C}$  NMR of **2**

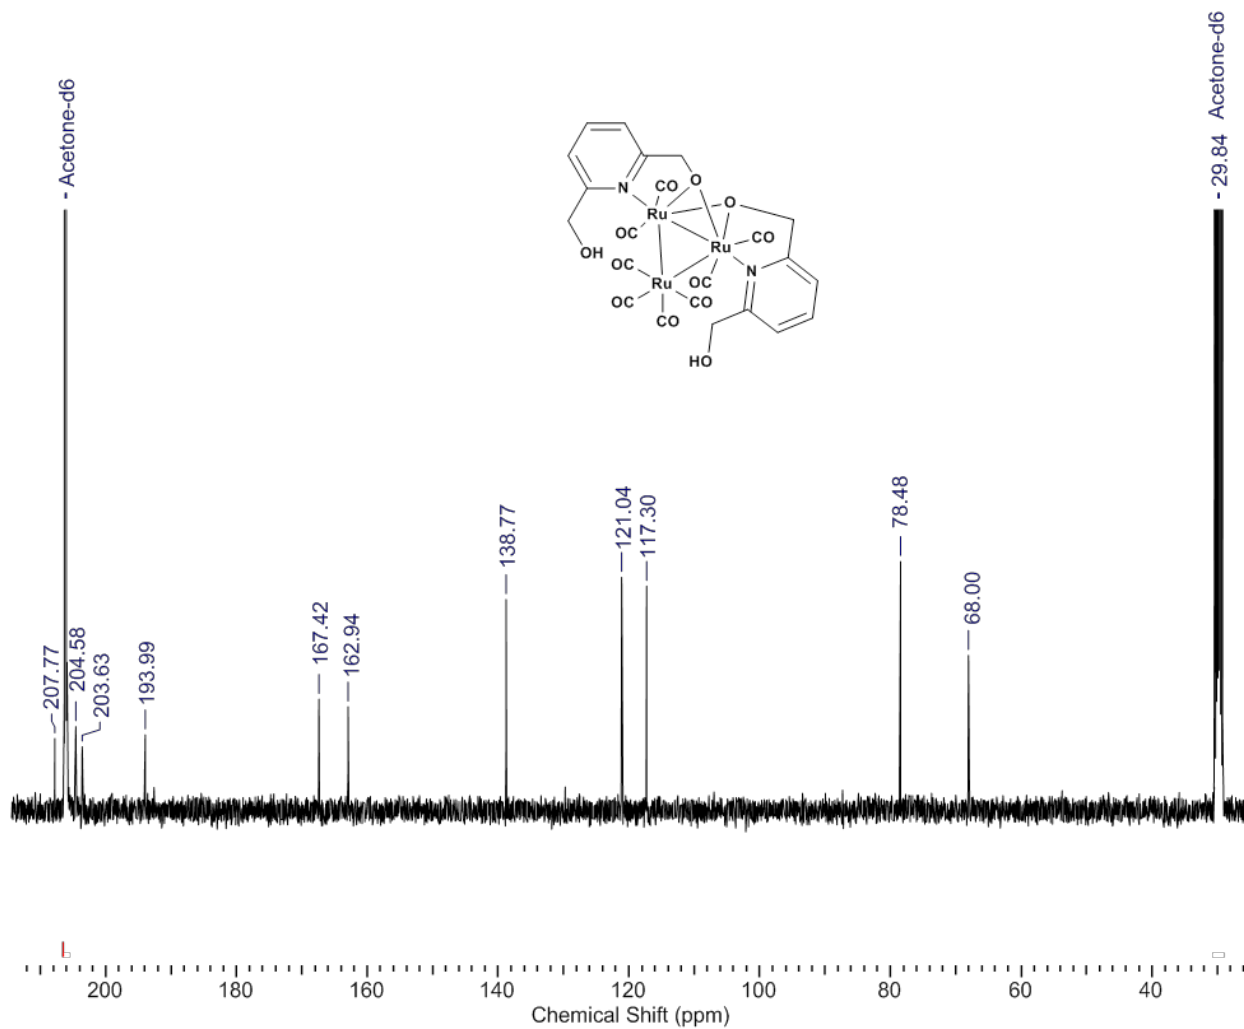

**Fig. S7.**  $^{13}\text{C}$  NMR of **3**

## Display Report

**Analysis Info**  
Analysis Name F:\Ruthenium Pyridine Paper\Mass data\Updated\M smm-aj-ru-p2e-r1 acetone\_RA6\_01\_4003.d  
Method 6. lcms\_direct infusion(ms+ lc)\_3000 neg.m  
Sample Name M smm-aj-ru-p2e-r1 acetone-  
Comment  
Acquisition Date 6/21/2017 3:49:33 PM  
Operator Ghanashyam Bhavsar  
Instrument micrOTOF-Q II 10348

### Acquisition Parameter

|             |            |                       |           |                  |           |
|-------------|------------|-----------------------|-----------|------------------|-----------|
| Source Type | ESI        | Ion Polarity          | Negative  | Set Nebulizer    | 2.0 Bar   |
| Focus       | Not active | Set Capillary         | 3500 V    | Set Dry Heater   | 250 °C    |
| Scan Begin  | 50 m/z     | Set End Plate Offset  | -500 V    | Set Dry Gas      | 7.0 l/min |
| Scan End    | 3000 m/z   | Set Collision Cell RF | 650.0 Vpp | Set Divert Valve | Waste     |

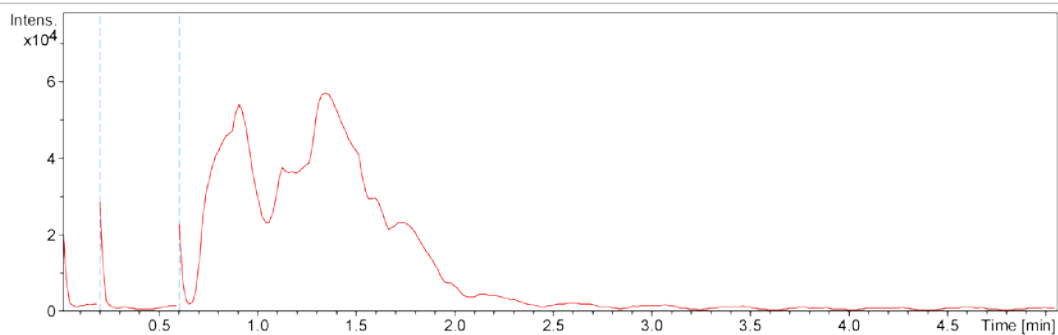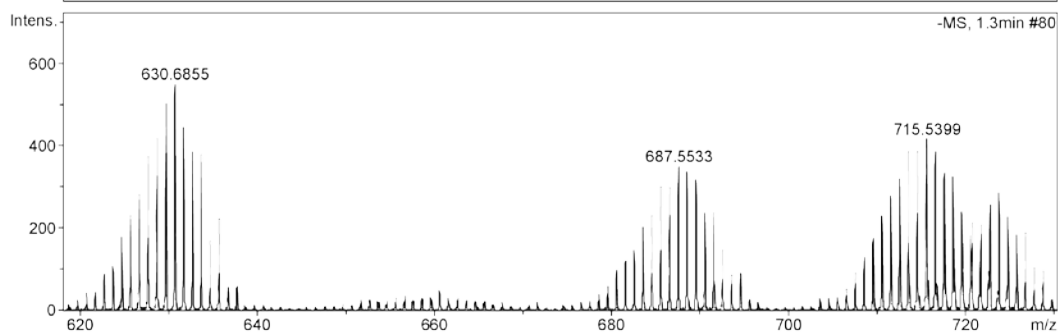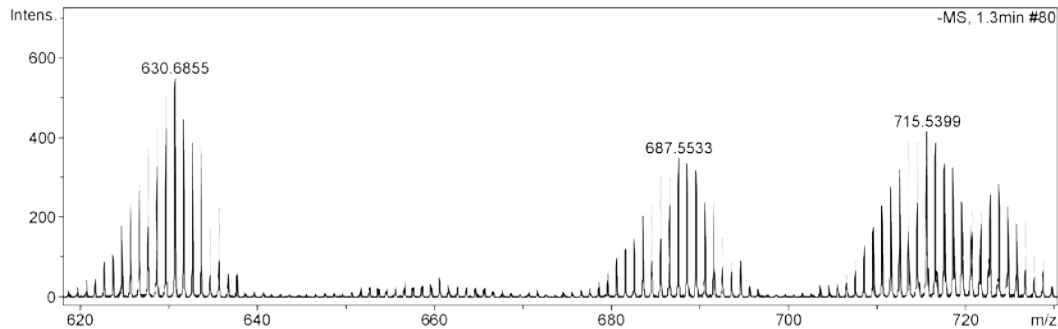

**Fig. S8. LCMS of 1**

## Display Report

### Analysis Info

Analysis Name F:\Ruthenium Pyridine Paper\Mass data\Updated\M smm-aj-ru-p2p-RA7\_01\_4008.d  
Method 6. lcms\_direct infusion(ms+ lc)\_3000 neg.m  
Sample Name M smm-aj-ru-p2p-  
Comment

Acquisition Date 6/21/2017 4:52:11 PM

Operator Ghanashyam Bhavsar

Instrument micrOTOF-Q II 10348

### Acquisition Parameter

|             |            |                       |           |                  |           |
|-------------|------------|-----------------------|-----------|------------------|-----------|
| Source Type | ESI        | Ion Polarity          | Negative  | Set Nebulizer    | 2.0 Bar   |
| Focus       | Not active | Set Capillary         | 3500 V    | Set Dry Heater   | 250 °C    |
| Scan Begin  | 50 m/z     | Set End Plate Offset  | -500 V    | Set Dry Gas      | 7.0 l/min |
| Scan End    | 3000 m/z   | Set Collision Cell RF | 650.0 Vpp | Set Divert Valve | Waste     |

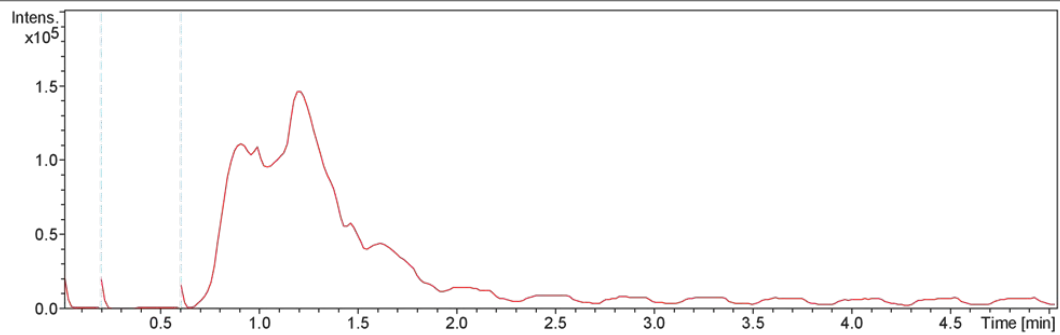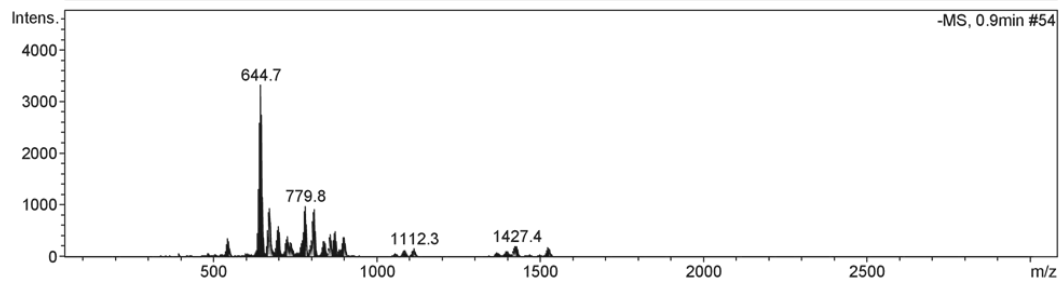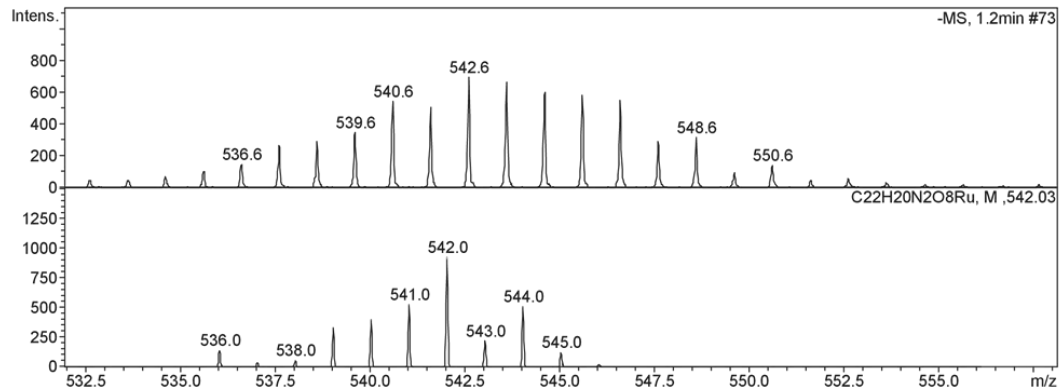

Fig. S9. LCMS of 2

## Display Report

### Analysis Info

Analysis Name D:\New folder\M smm-aj-fc910 contradict.d  
Method tune\_wide.m  
Sample Name M smm-aj-fc910 contradict  
Comment

Acquisition Date 7/17/2017 11:58:04 AM

Operator Ghanashyam Bhavsar  
Instrument micrOTOF-Q II 10348

### Acquisition Parameter

|             |            |                       |           |                  |           |
|-------------|------------|-----------------------|-----------|------------------|-----------|
| Source Type | ESI        | Ion Polarity          | Positive  | Set Nebulizer    | 0.4 Bar   |
| Focus       | Not active | Set Capillary         | 4500 V    | Set Dry Heater   | 250 °C    |
| Scan Begin  | 21 m/z     | Set End Plate Offset  | -500 V    | Set Dry Gas      | 2.5 l/min |
| Scan End    | 3000 m/z   | Set Collision Cell RF | 650.0 Vpp | Set Divert Valve | Waste     |

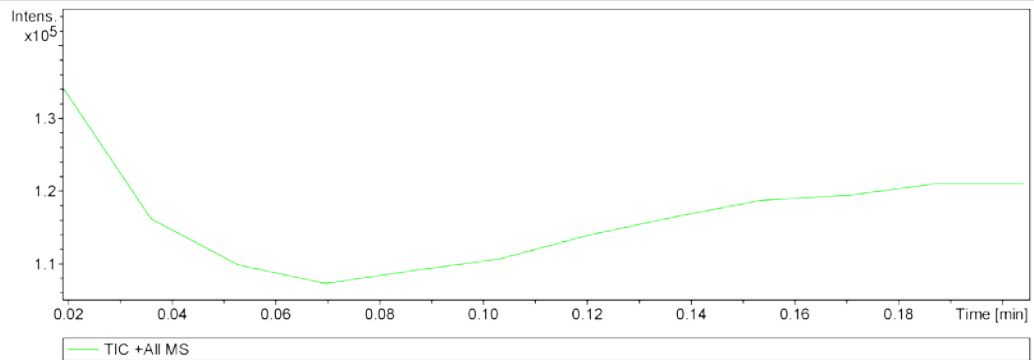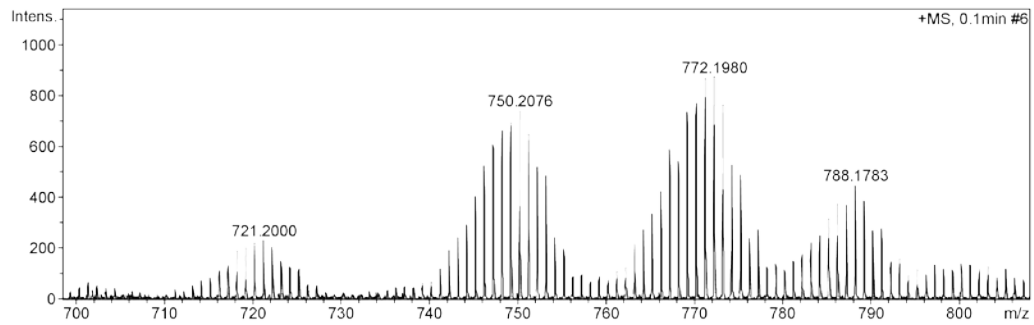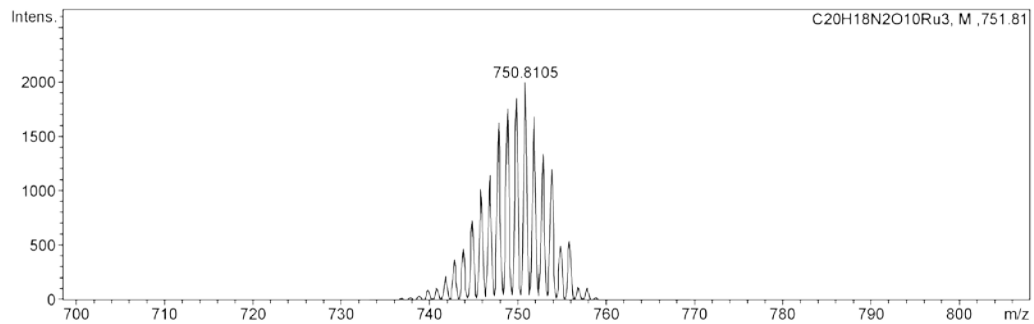

**Fig. S10. LCMS of 3**



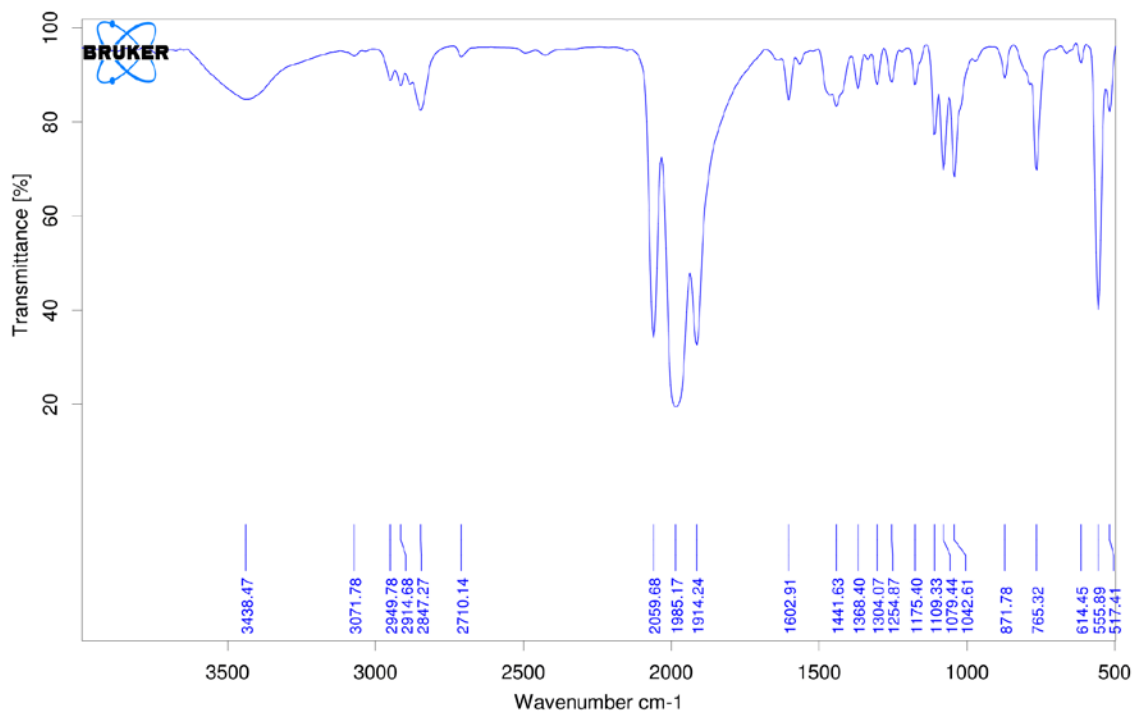

|                           |          |         |            |
|---------------------------|----------|---------|------------|
| E:\Ajeet Singh\Aj-RuP2E.0 | Aj-RuP2E | crystal | 24/03/2017 |
|---------------------------|----------|---------|------------|

Fig. S11. IR of 1

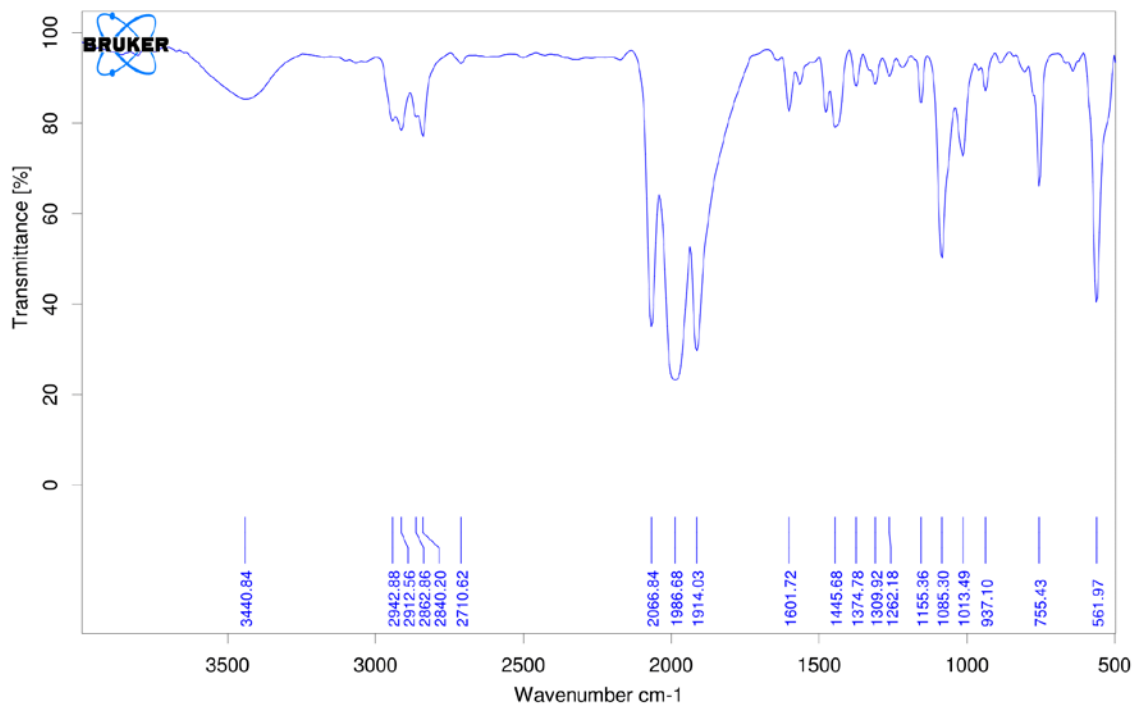

|                           |          |         |            |
|---------------------------|----------|---------|------------|
| E:\Ajeet Singh\Aj-RuP2P.0 | Aj-RuP2P | crystal | 24/03/2017 |
|---------------------------|----------|---------|------------|

Fig. S12. IR of 2

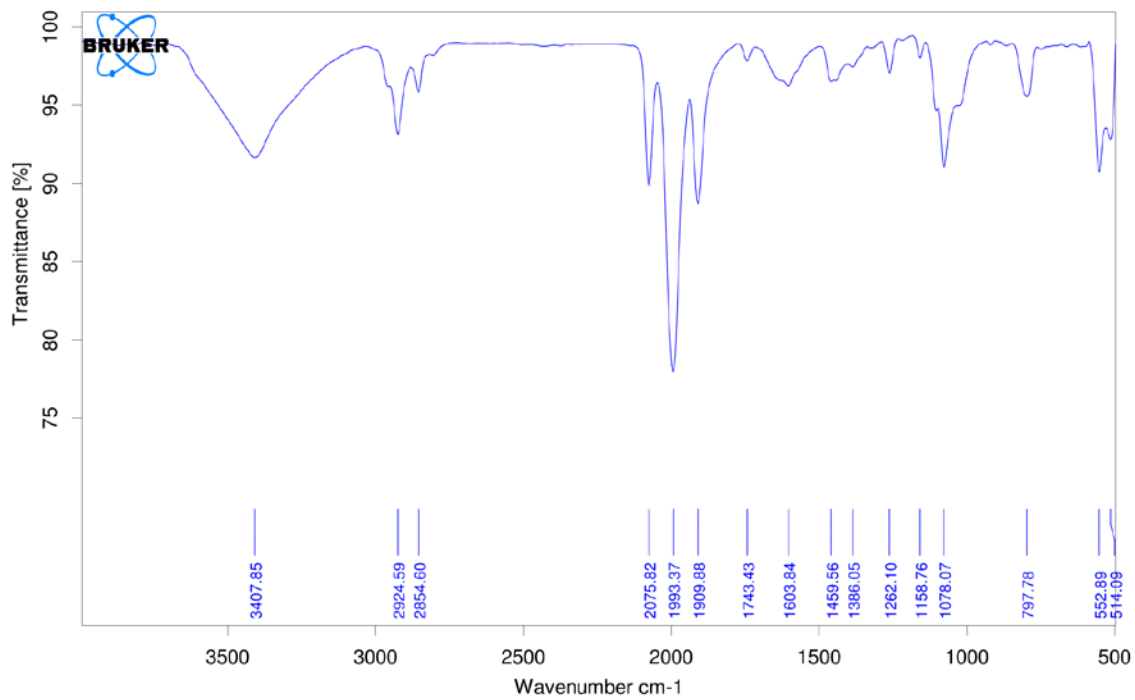

|                            |           |         |            |
|----------------------------|-----------|---------|------------|
| E:\Ajeet Singh\Aj-RuP2DM.0 | Aj-RuP2DM | crystal | 24/03/2017 |
|----------------------------|-----------|---------|------------|

Fig. S13. IR of 3

### Description of polymeric chains present in the clusters 1–3

The presence of C-H $\cdots$ O interaction between H7a and O7 with the bond length 2.684 Å gives rise to the 1D polymeric chain (see Fig. S14).<sup>1</sup> The H3 $\cdots$ O2 interactions with bond length 2.711 Å give rise to the 2D polymeric chain (see Fig. S22). This also looks like inverted nest facing towards each other, if observed from ‘tilted c’ axis. The presence of C-H $\cdots$ C interaction along with C-H $\cdots$ O between C11 $\cdots$ H17 i.e. C11 from carbonyl and H17 from pyridine ring gives rise to the 3D polymeric chain (see Fig. S23). The bond length is 2.779 Å.

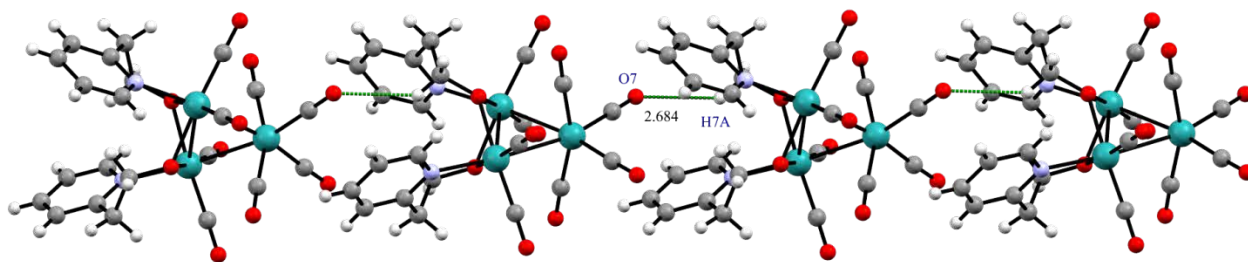

**Fig. S14.** 1D polymeric chain of complex 1

The presence of C-H $\cdots$ O interaction between H2 and O10 with the bond length 2.513 Å gives rise to the 1D polymeric chain (see Fig. S15). The C1 $\cdots$ O4 interactions with bond length 3.194 Å give rise to the 2D polymeric chain (see Fig. S24). This also looks like an inverted nest but more packed and one layer faces in the same direction and other in another direction if seen from tilted ‘c’ axis. The presence of C-H $\cdots$ O interaction between H14A $\cdots$ O10 gives rise to the 3D polymeric chain (see Fig. S25).<sup>2</sup> The bond length is 2.700 Å.

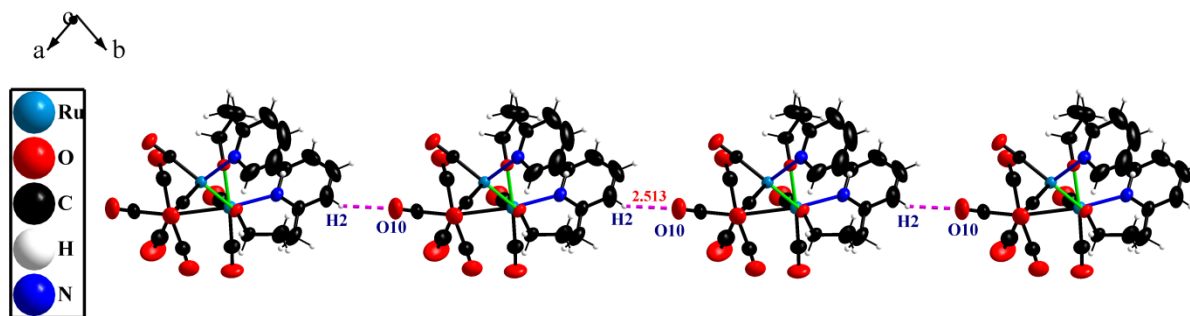

**Fig. S15.** 1D polymeric chain of complex **2**

The presence of C-H...O interaction between H6A...O10 and H11...O5 with the bond length 2.572 Å and 2.618 Å, respectively gives rise to the 1D polymeric chain (see Fig. S16). The H4A...O11 is hydrogen bond interactions with bond length 2.035 Å and H4A...O11 C-H...O interaction with bond length 2.414 Å if seen along 'b' axis give rise to 2D polymeric chain (see Fig. S26). Along with other interactions, the presence of  $\pi\cdots\pi$  interaction between C8...C3 and C9...C2 give rise to the 3D polymeric chain (see Fig. S27) and the bond length is 3.389 Å and 3.386 Å, respectively.

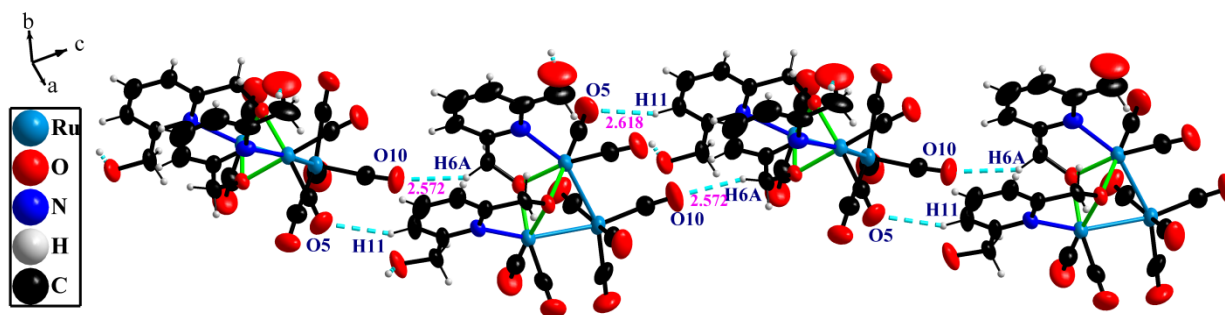

**Fig. S16.** 1D polymeric chain of complex **3**

### Salient features and comparison of the structure 1–3

The molecule  $\text{Ru}_3(\text{CO})_{12}$  has essentially  $D_{3h}$  symmetry with a mean Ru–Ru bond length of 2.848 Å.<sup>12</sup> In the complexes, **1–3**, the bond distance stretched and length was more than 2.848 Å. The bond length is 3.078, 3.030 and 3.045 Å, respectively. Complex **2** has a seven-membered stable ring which involves C13–C16, O2, N2 and Ru2 (see Fig. S17).

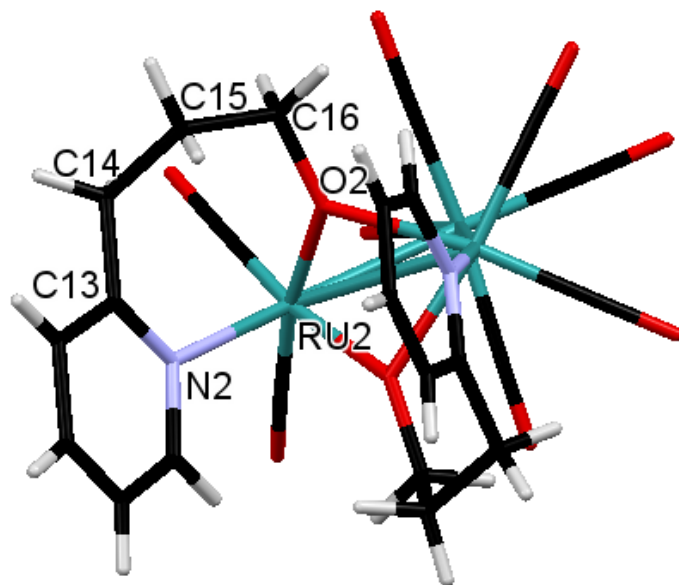

**Fig. S17.** Seven-membered ring in complex **2** involving C13–C16, O2, N2 and Ru2

In complex **3**, the hydrogen bonding is present between H2A and O4 atoms. The bond length is 2.045 Å (see Fig. S18).

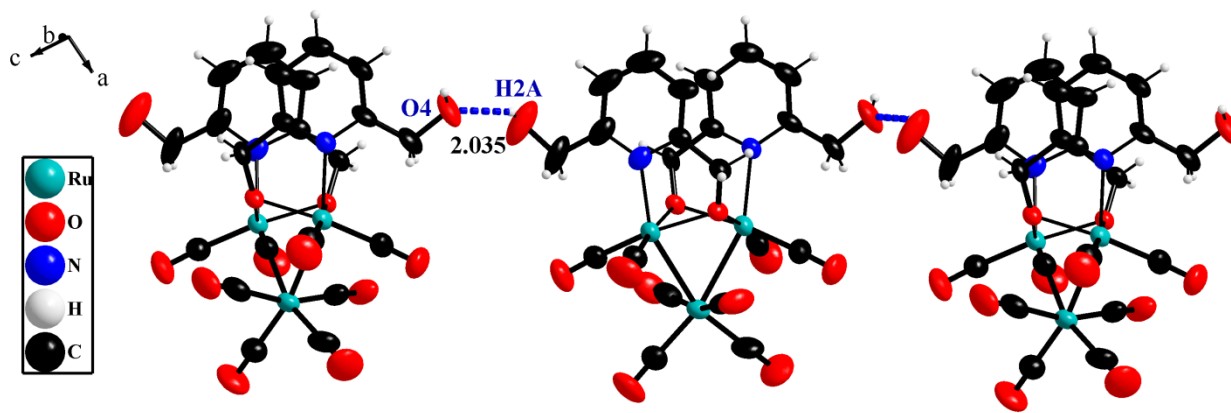

**Fig. S18.** Hydrogen bonding in **3** between H2A···O4 with distance 2.035 Å

## Symmetry Operators

**Table S2.** Symmetry operators present in complex 1

| Number | Symm. Op.             | Description         | Detailed Description                                                                             | Order | Type |
|--------|-----------------------|---------------------|--------------------------------------------------------------------------------------------------|-------|------|
| 1      | $x,y,z$               | Identity            | Identity                                                                                         | 1     | 1    |
| 2      | $1/2-x, 1/2+y, 1/2-z$ | Screw axis (2-fold) | 2-fold screw axis with direction $[0, 1, 0]$ at $1/4, y, 1/4$ with screw component $[0, 1/2, 0]$ | 2     | 2    |
| 3      | $-x, -y, -z$          | Inversion centre    | Inversion at $[0, 0, 0]$                                                                         | 2     | -1   |
| 4      | $1/2+x, 1/2-y, 1/2+z$ | Glide plane         | Glide plane perpendicular to $[0, 1, 0]$ with glide component $[1/2, 0, 1/2]$                    | 2     | -2   |

**Table S3.** Symmetry operators present in complex **2**

| Number | Symm. Op.  | Description      | Detailed Description     | Order | Type |
|--------|------------|------------------|--------------------------|-------|------|
| 1      | $x,y,z$    | Identity         | Identity                 | 1     | 1    |
| 2      | $-x,-y,-z$ | Inversion centre | Inversion at $[0, 0, 0]$ | 2     | -1   |



**Table S4.** Symmetry operators present in complex **3**

| Number | Symm. Op.                       | Description            | Detailed Description                                                                                     | Order | Type |
|--------|---------------------------------|------------------------|----------------------------------------------------------------------------------------------------------|-------|------|
| 1      | $x,y,z$                         | Identity               | Identity                                                                                                 | 1     | 1    |
| 2      | $1/2-x,$<br>$1/2+y,$<br>$1/2-z$ | Screw axis<br>(2-fold) | 2-fold screw axis with direction $[0, 1, 0]$<br>at $1/4, y, 1/4$ with screw component $[0,$<br>$1/2, 0]$ | 2     | 2    |
| 3      | $-x,-y,-z$                      | Inversion<br>centre    | Inversion at $[0, 0, 0]$                                                                                 | 2     | -1   |
| 4      | $1/2+x,$<br>$1/2-y,$<br>$1/2+z$ | Glide plane            | Glide plane perpendicular to $[0, 1, 0]$<br>with glide component $[1/2, 0, 1/2]$                         | 2     | -2   |

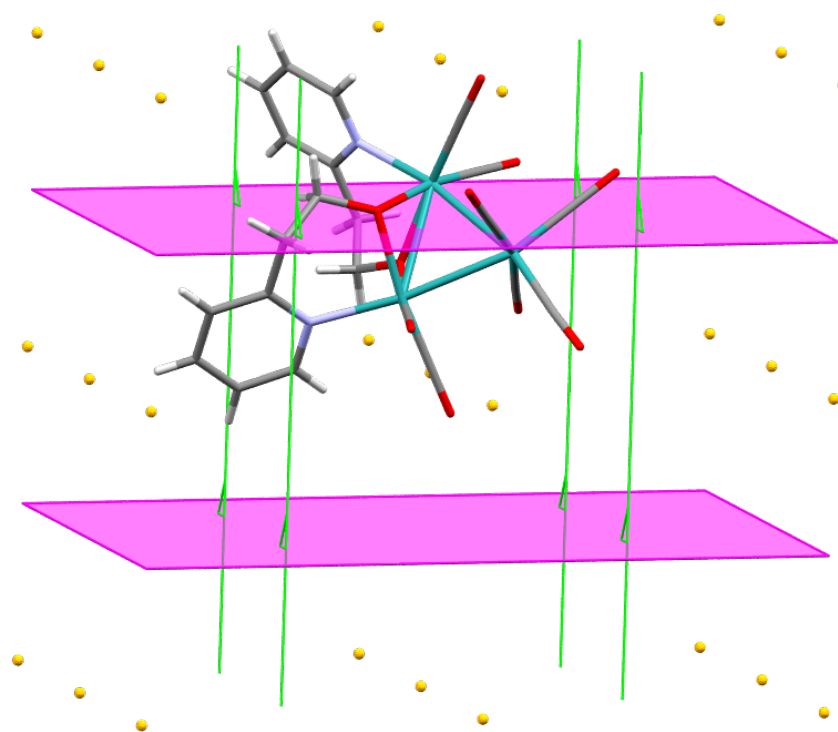

**Fig. S19.** Symmetry operators present in **1**

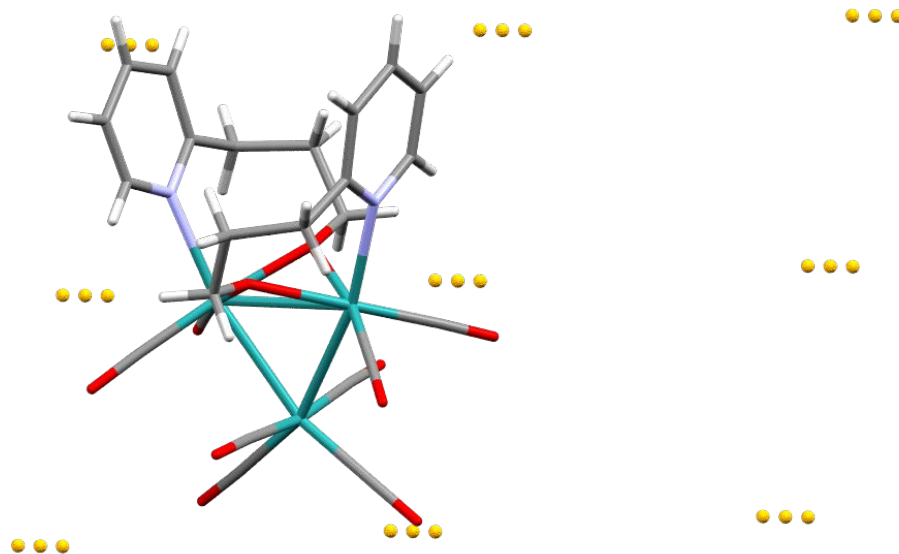

**Fig. S20.** Symmetry operators present in **2**

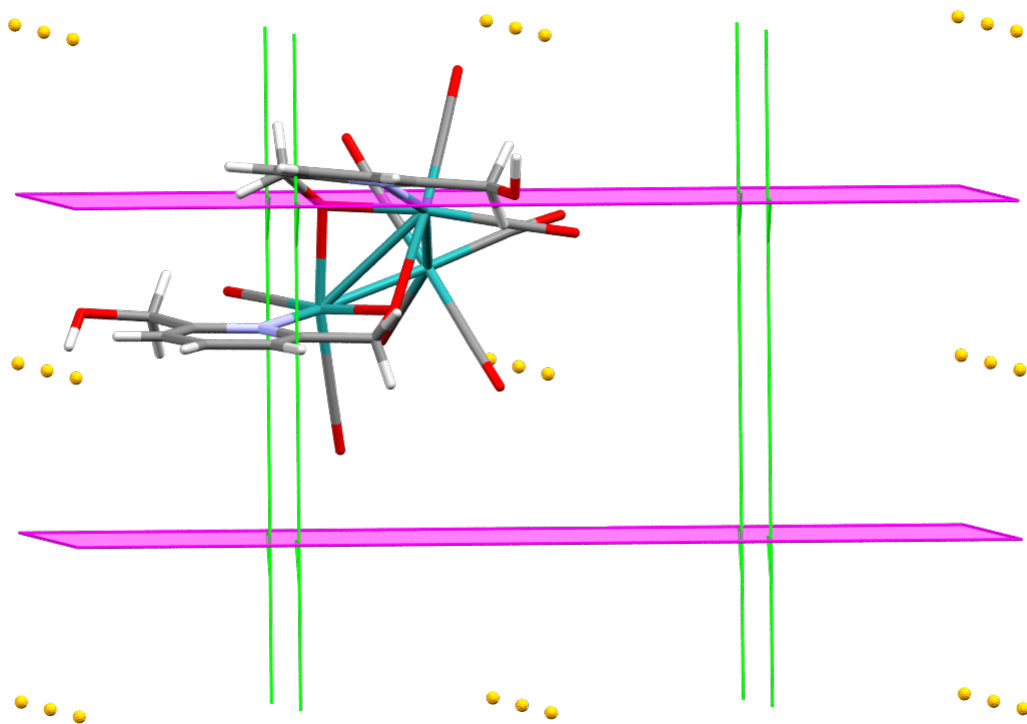

**Fig. S21.** Symmetry operators present in **3**

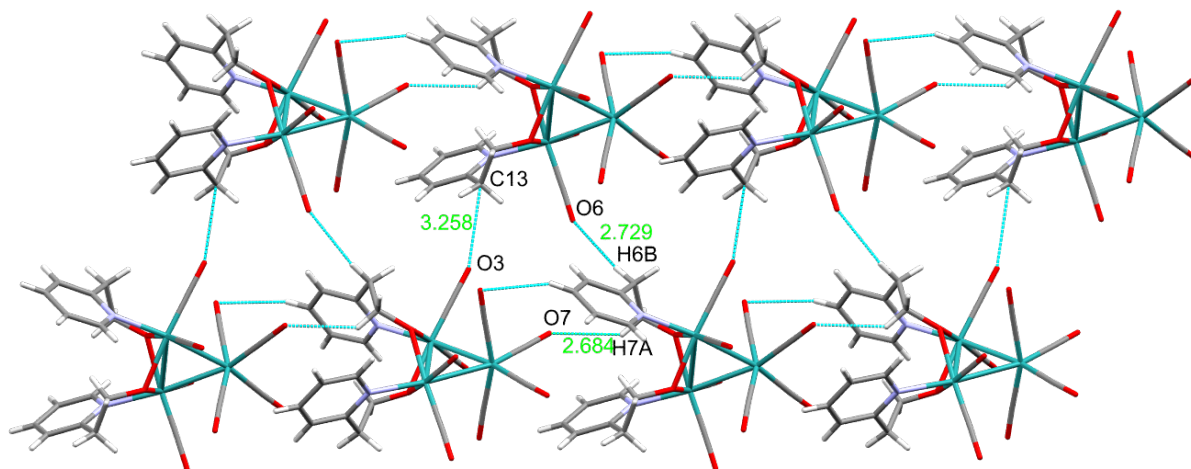

**Fig. S22.** 2D network of **1** along tilted c-axis

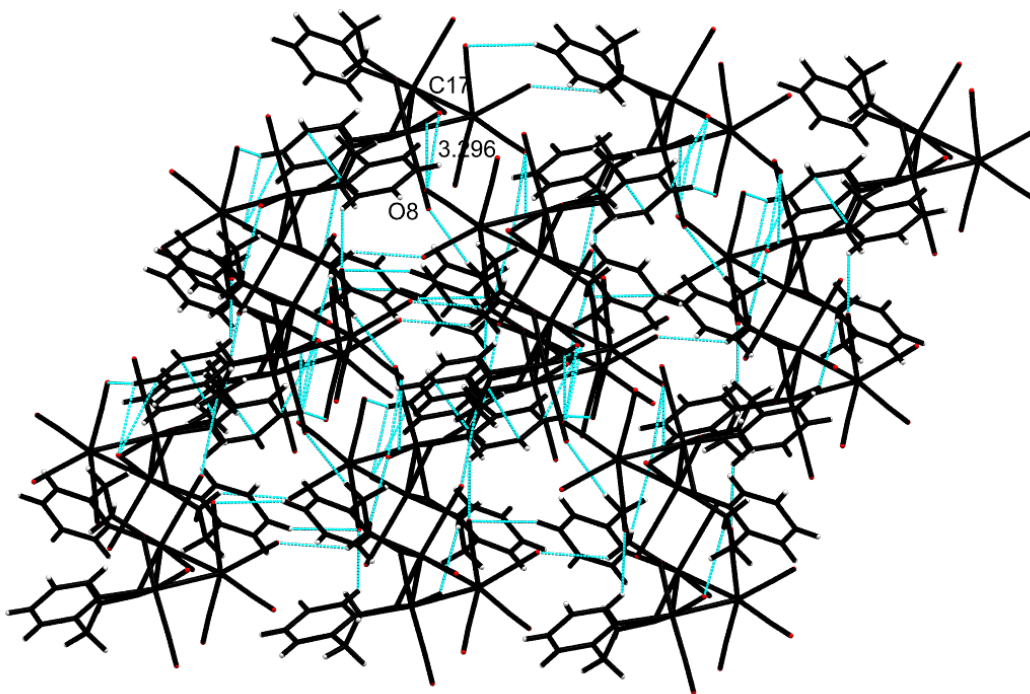

**Fig. S23.** 3D network of **1** along b-axis

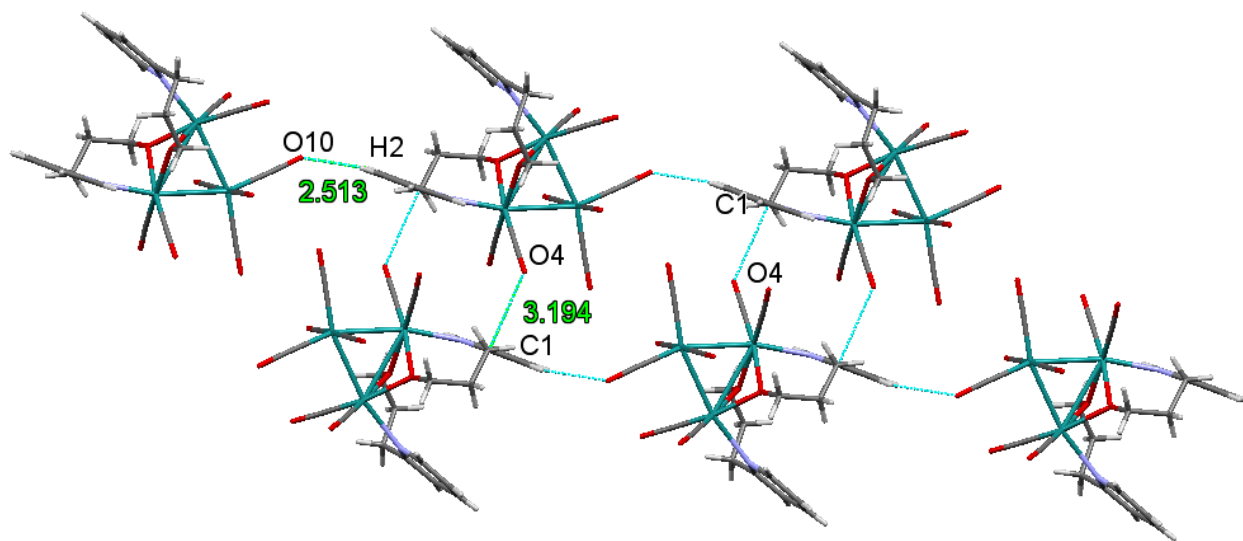

**Fig. S24.** 2D network of **2** along c-axis

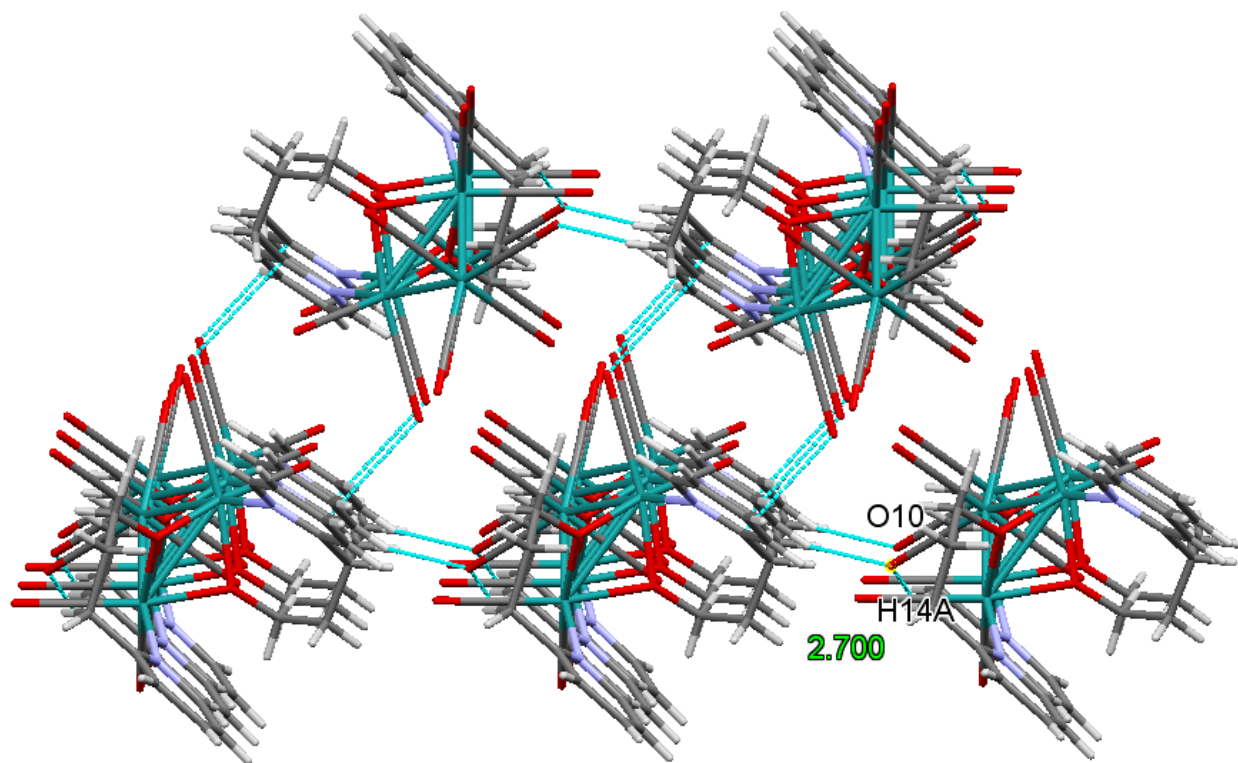

**Fig. S25.** 3D network of **2** along tilted a-axis



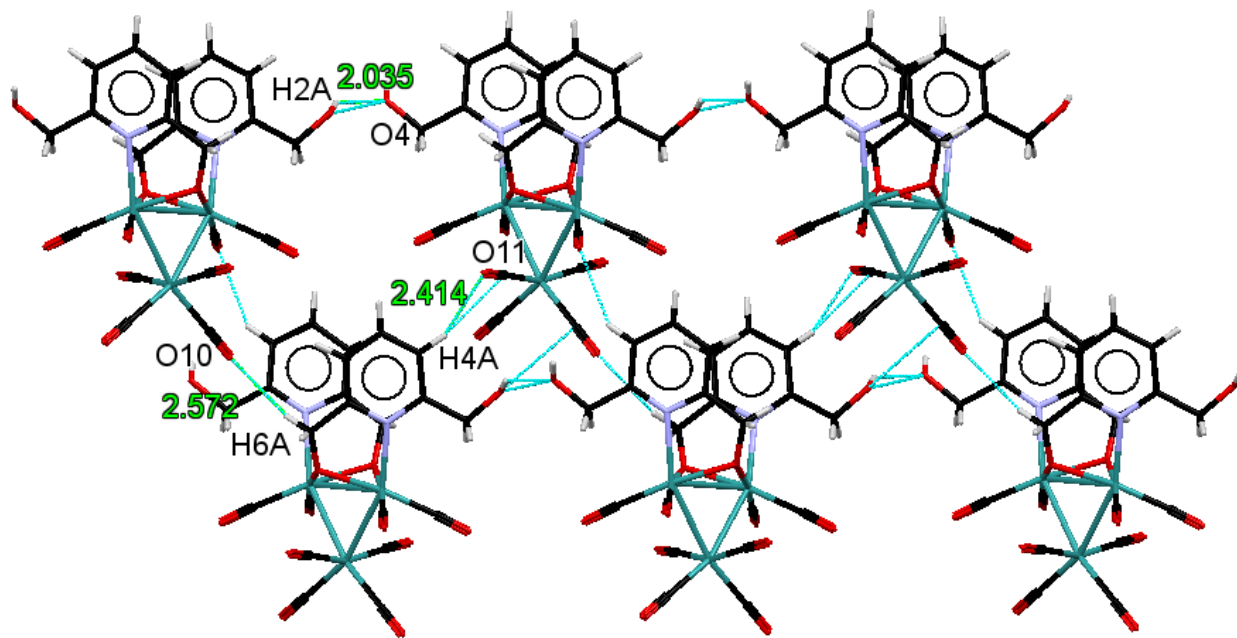

**Fig. S26.** 2D network of 3 along b-axis

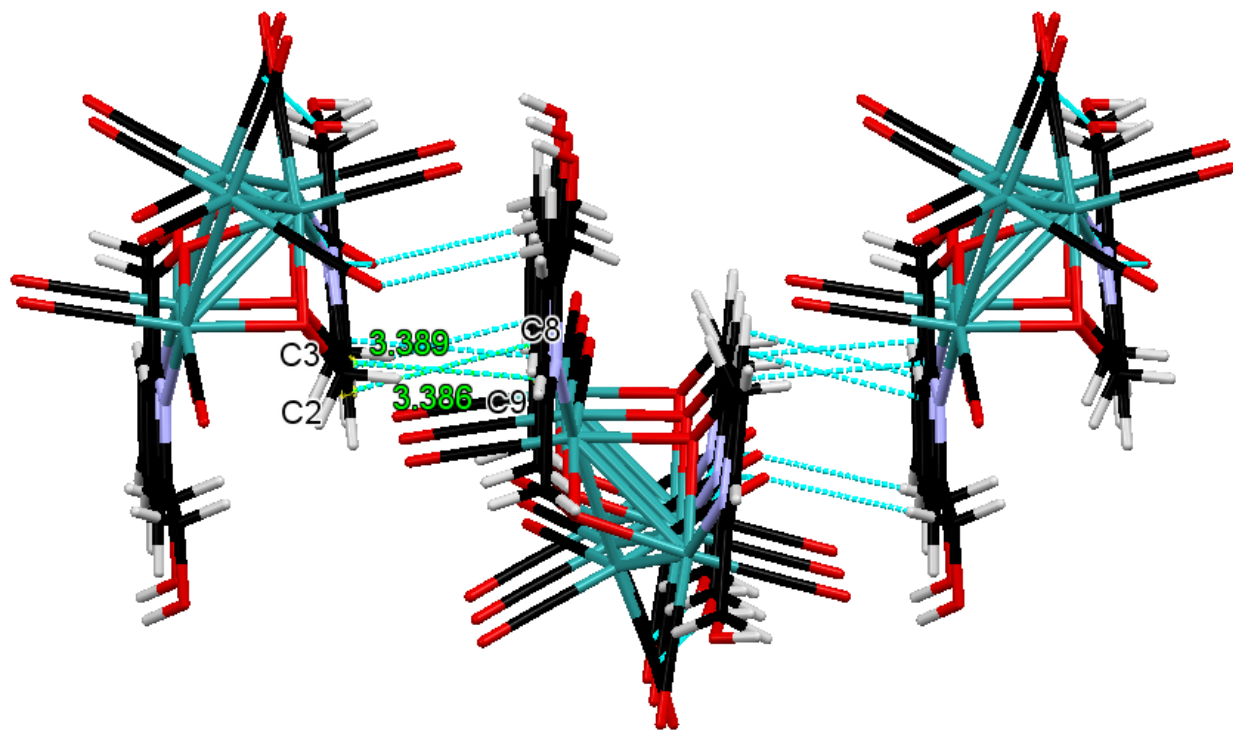

**Fig. S27.** 3D network of **3** along tilted a-axis

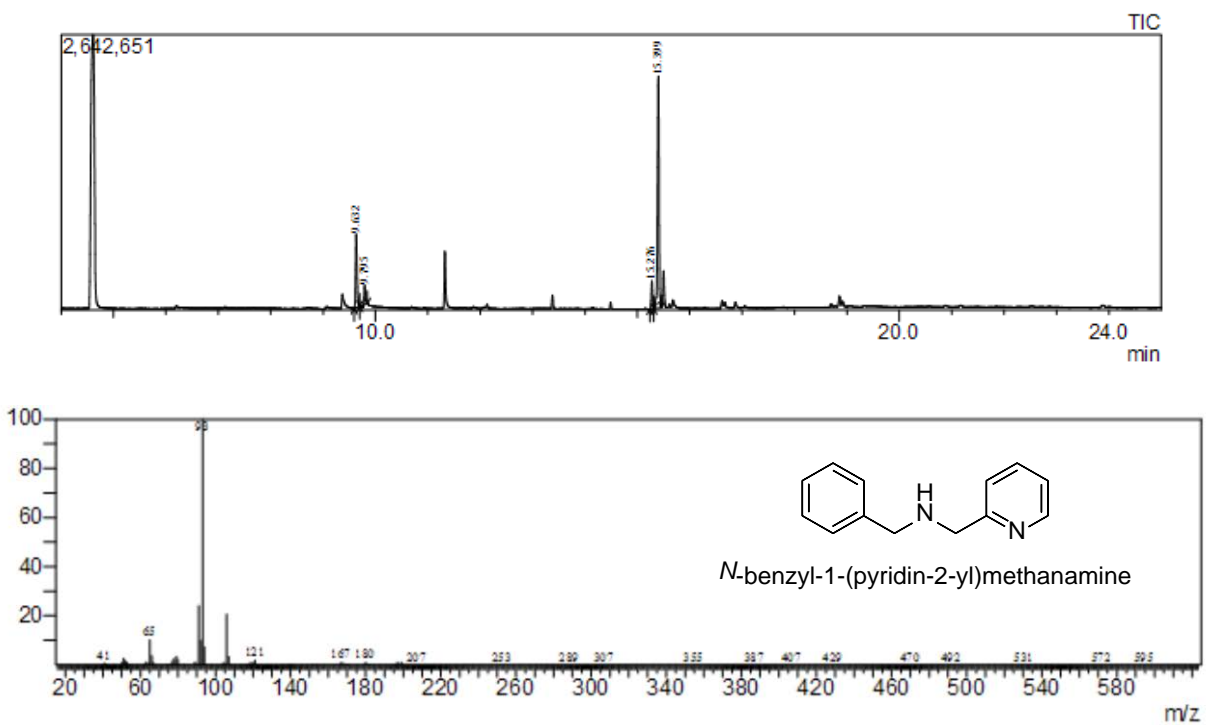

**Fig. S28.** GCMS of table 3, entry no. 3 (chromatogram and mass peaks)

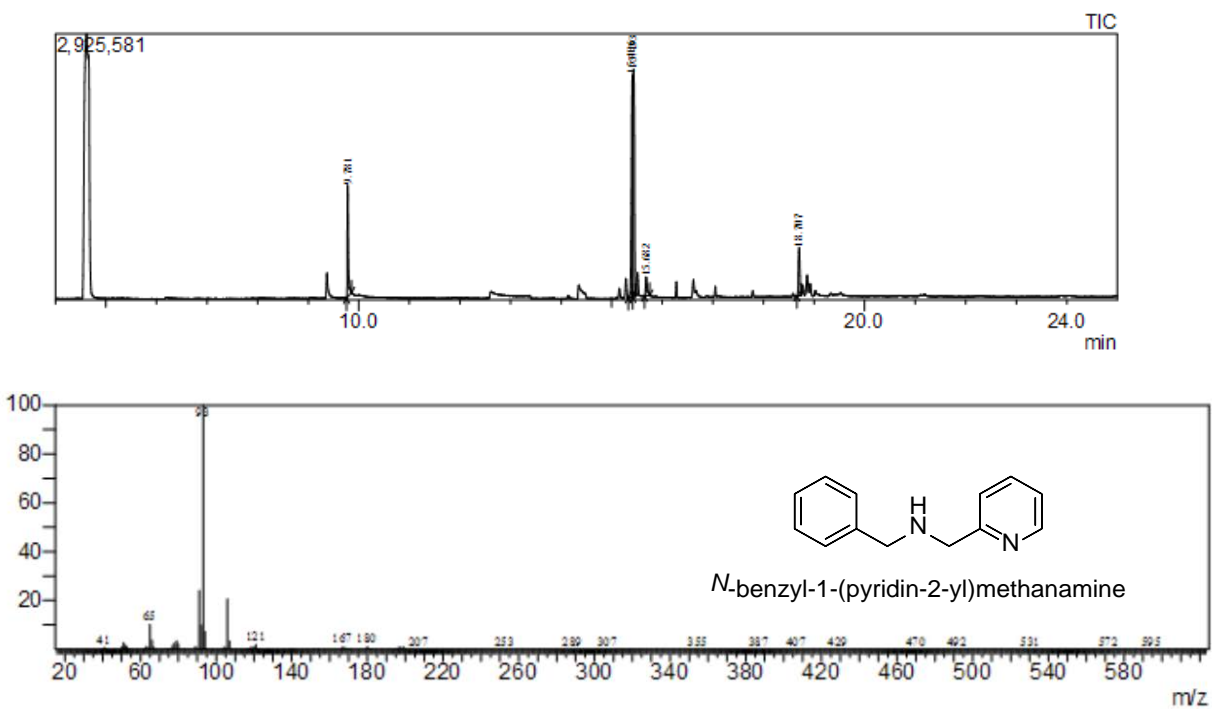

**Fig. S29.** GCMS of table 3, entry no. 4 (chromatogram and mass peaks)

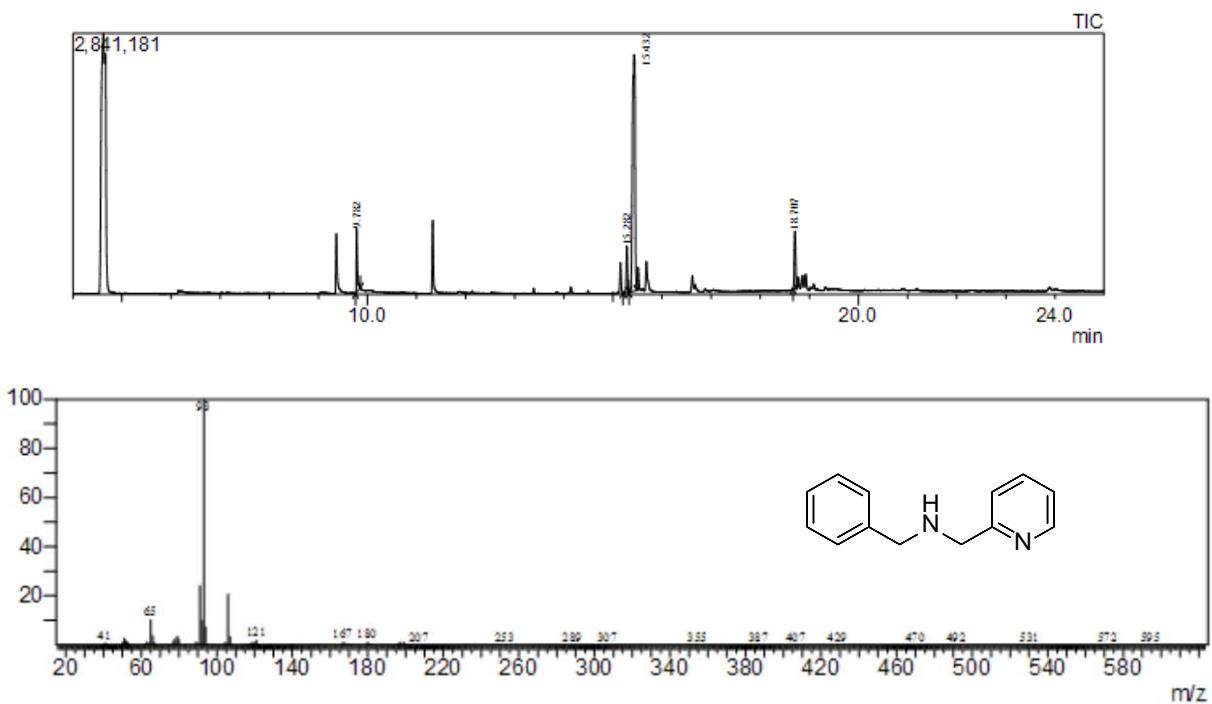

**Fig. S30.** GCMS of table 3, entry no. 5 (chromatogram and mass peaks)

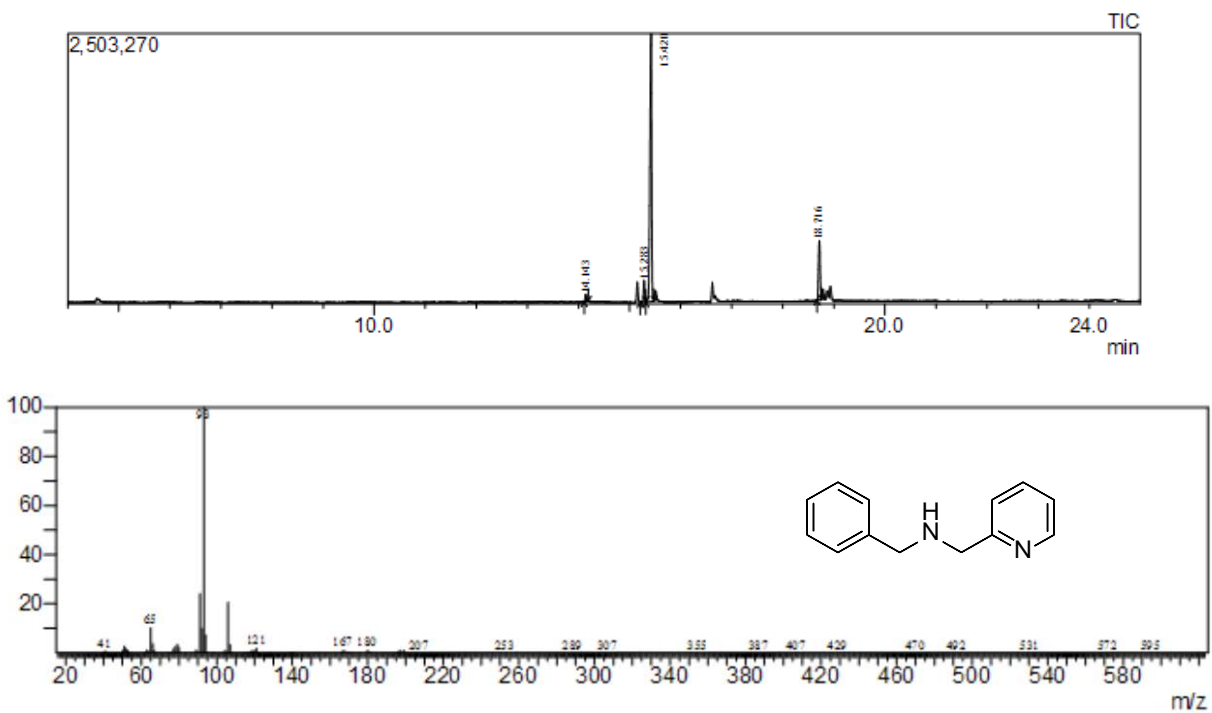

**Fig. S31.** GCMS of table 3, entry no. 6 (chromatogram and mass peaks)

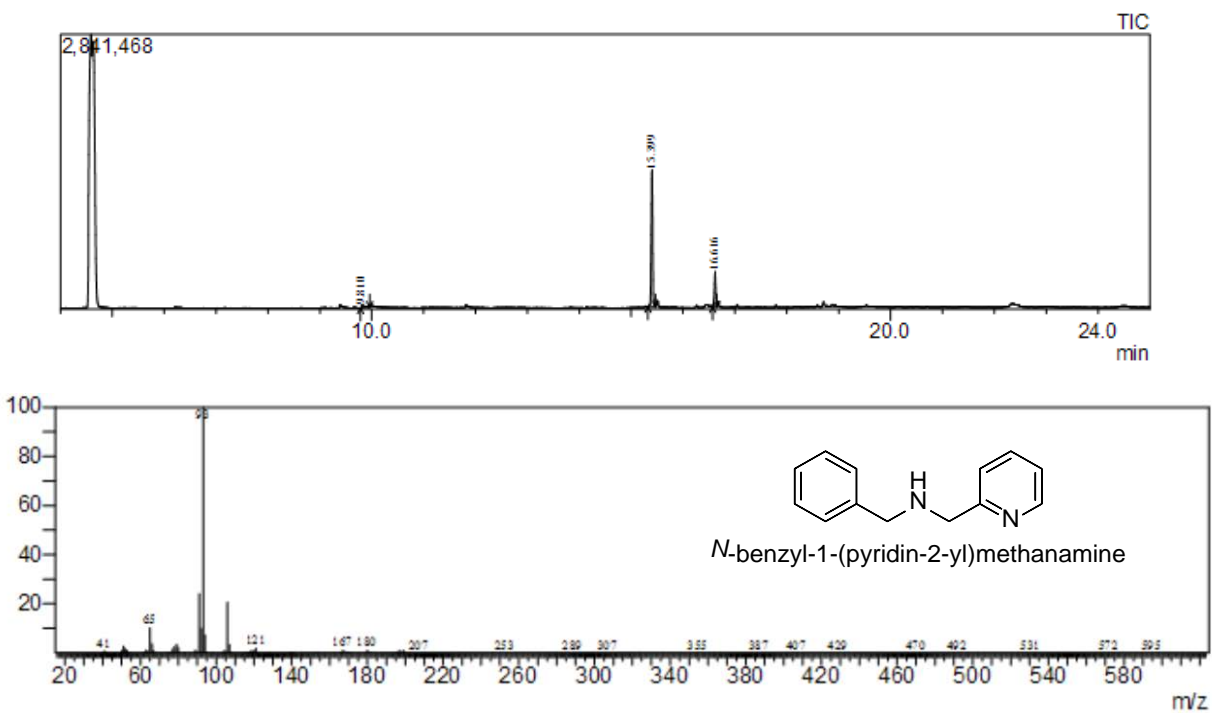

**Fig. S32.** GCMS of table 3, entry no. 7 (chromatogram and mass peaks)

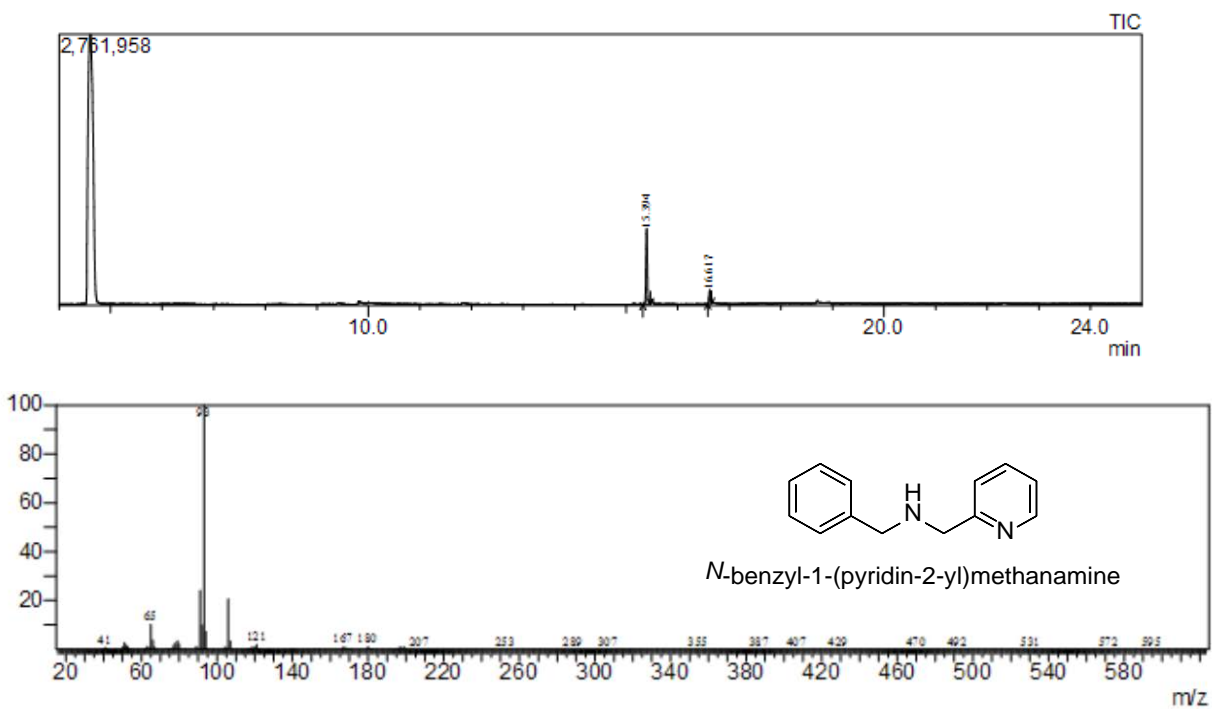

**Fig. S33.** GCMS of table 3, entry no. 8 (chromatogram and mass peaks)



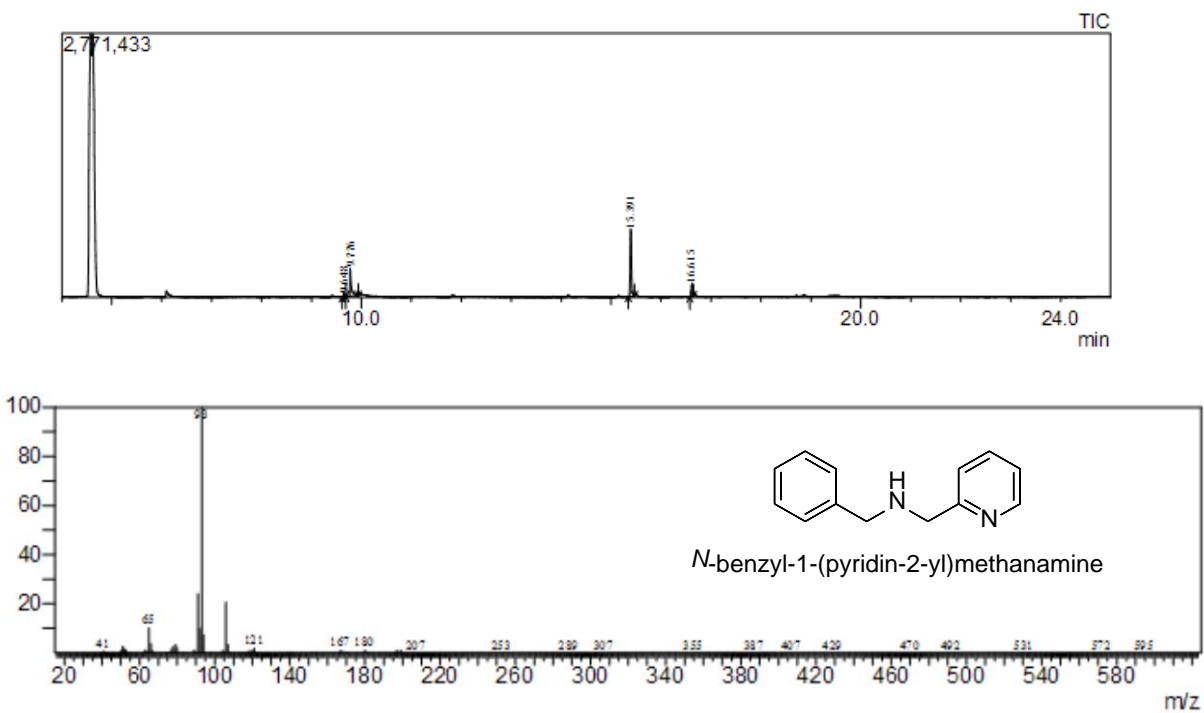

**Fig. S34.** GCMS of table 3, entry no. 9 (chromatogram and mass peaks)

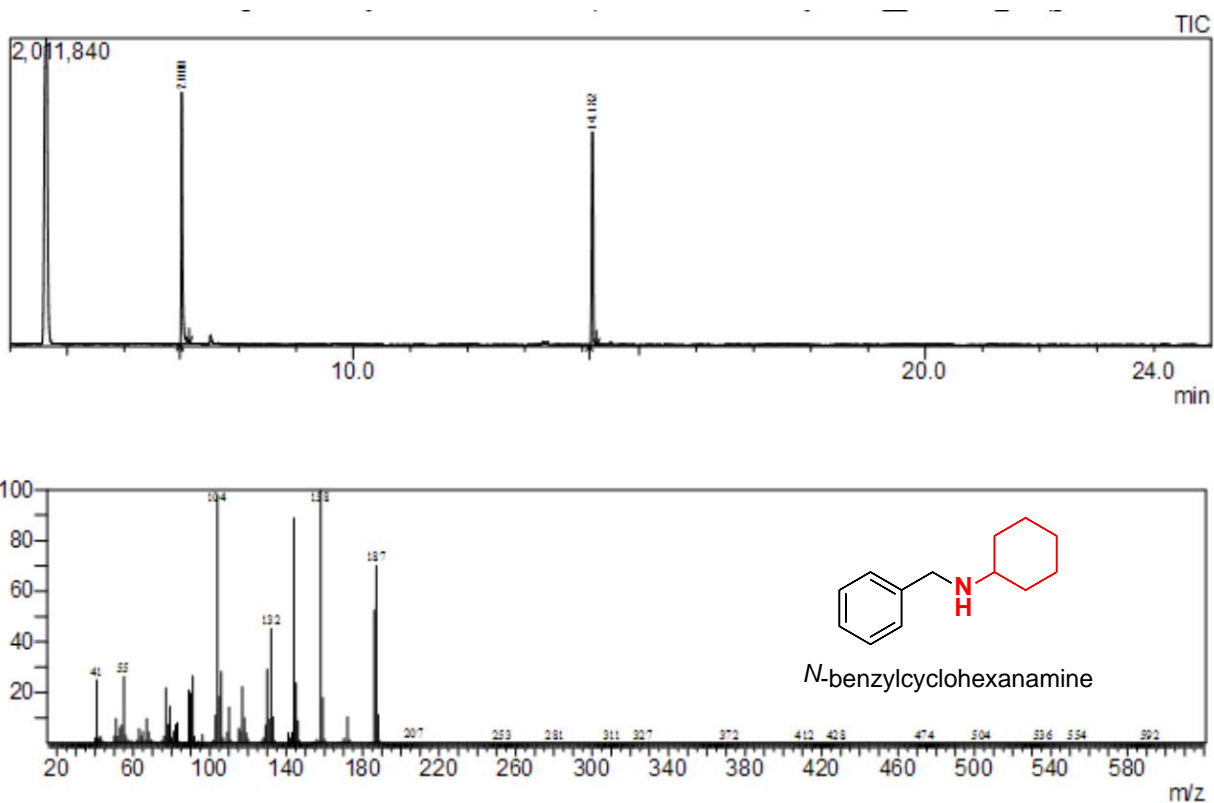

**Fig. S35.** GCMS of table 4, entry no. 2 (chromatogram and mass peaks)

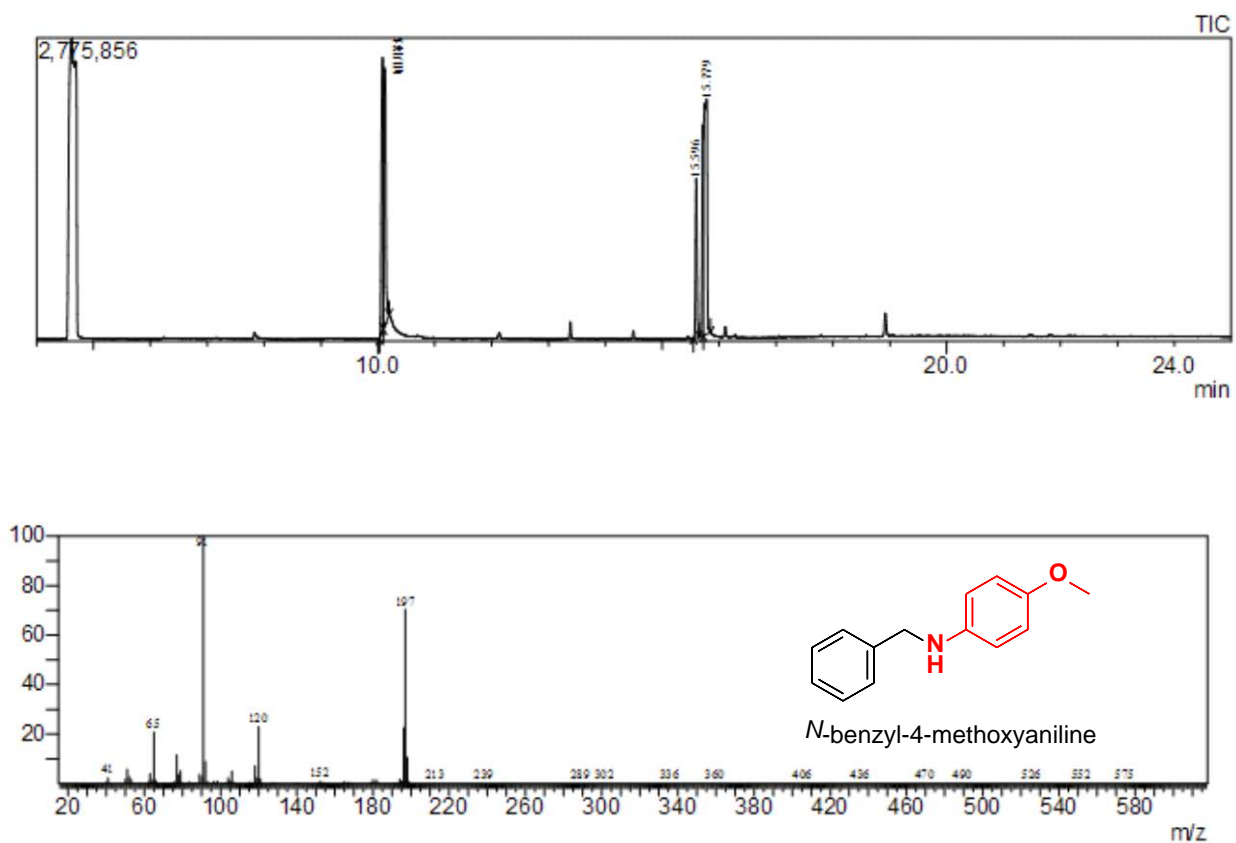

**Fig. S36.** GCMS of table 4, entry no. 3 (chromatogram and mass peaks)

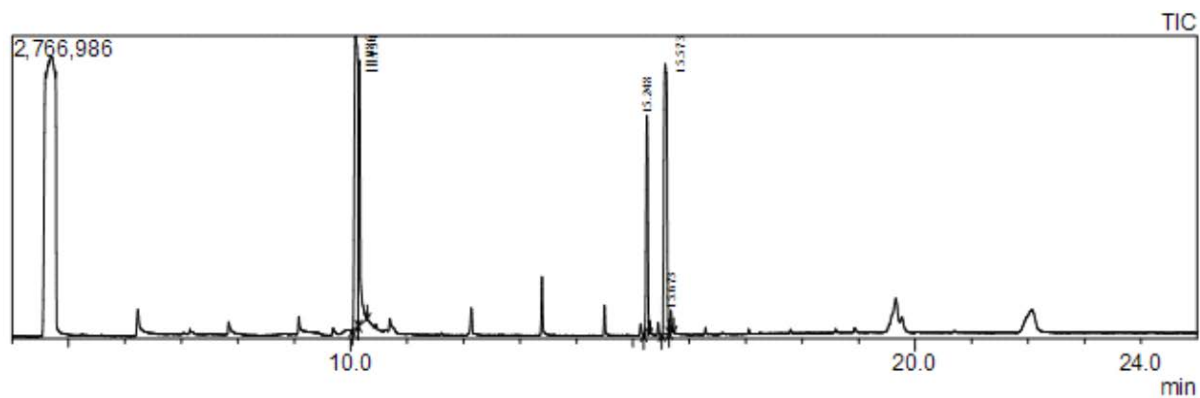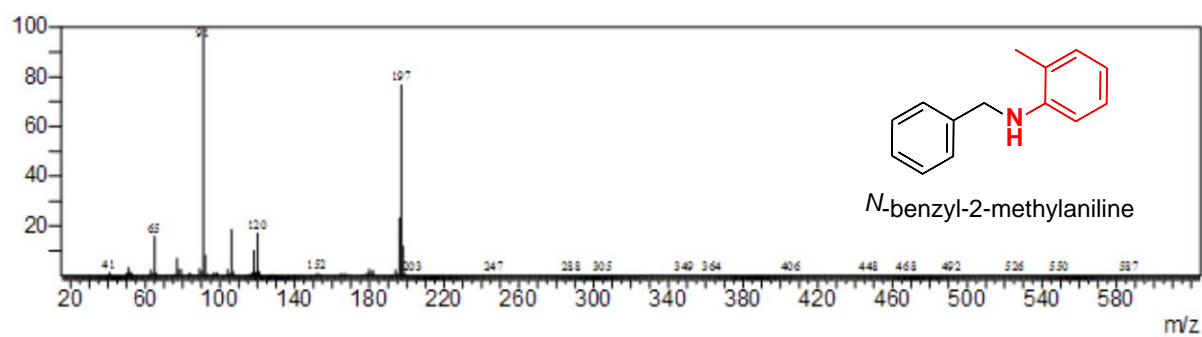

**Fig. S37.** GCMS of table 4, entry no. 4 (chromatogram and mass peaks)

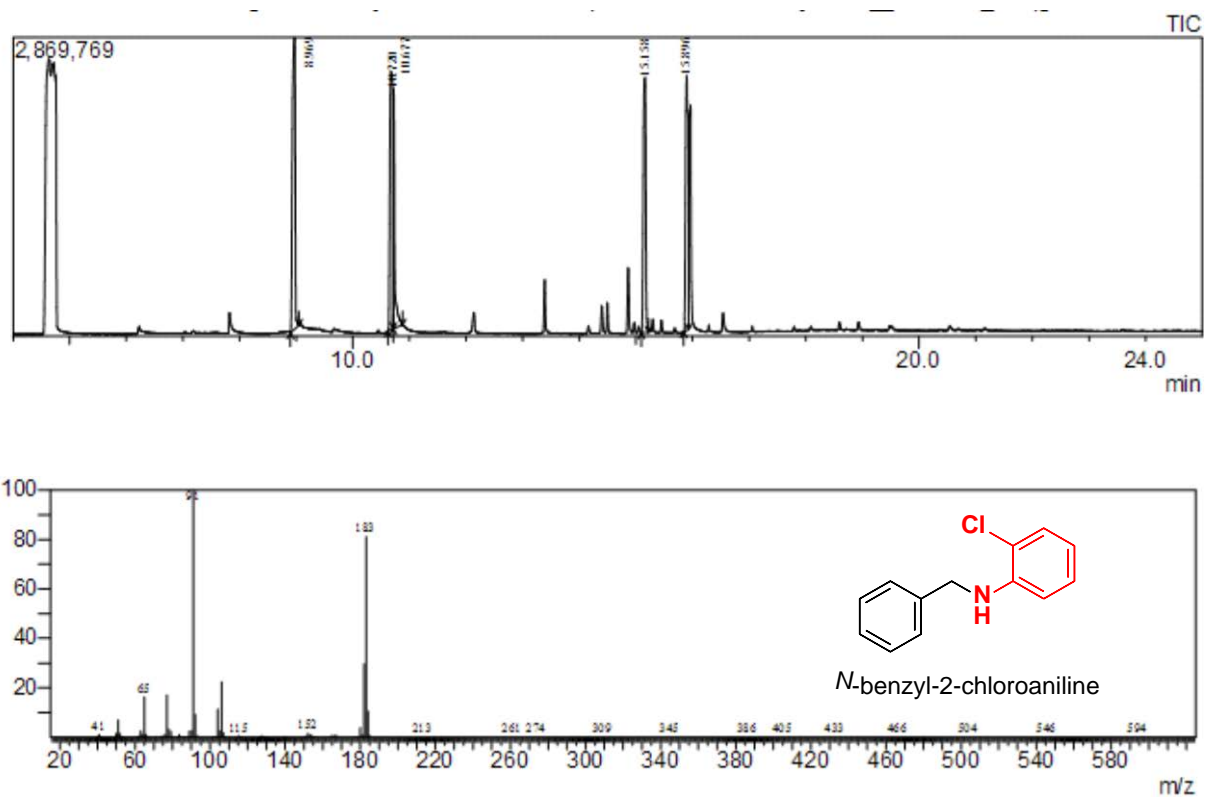

**Fig. S38.** GCMS of table 4, entry no. 5 (chromatogram and mass peaks)

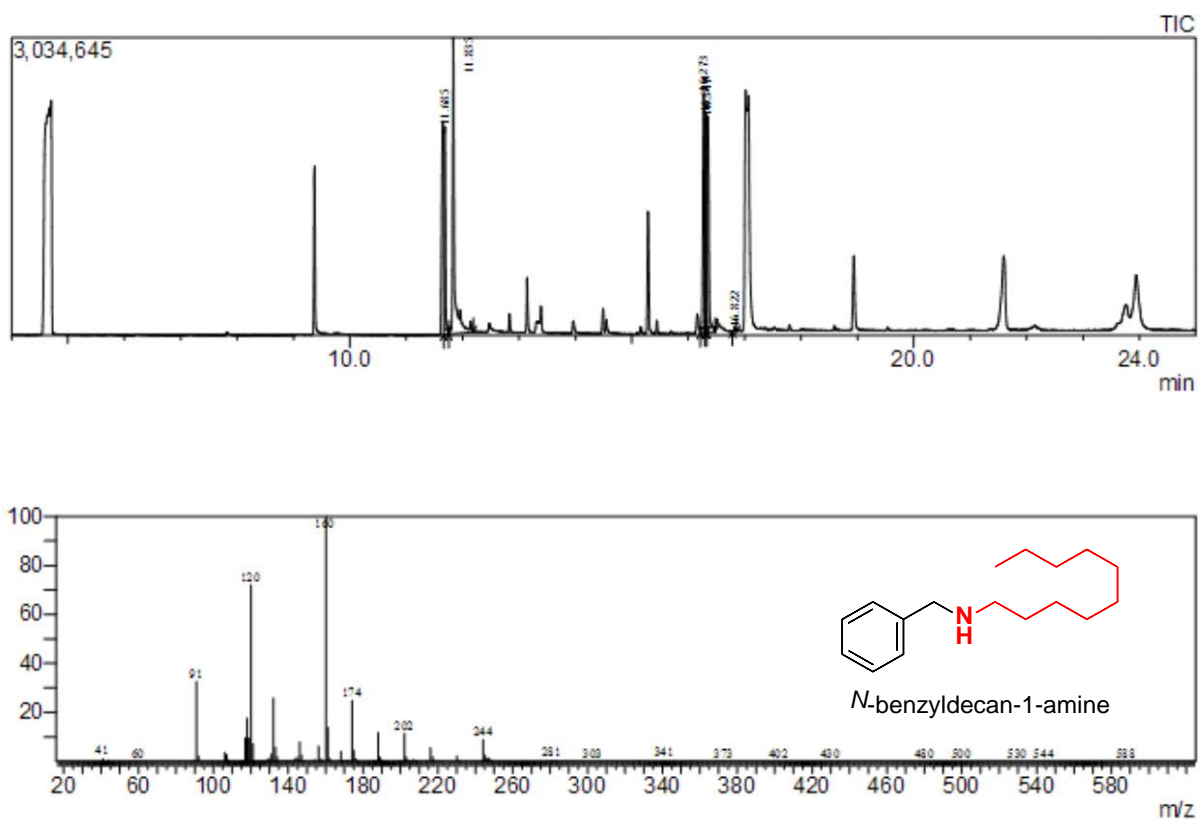

**Fig. S39.** GCMS of table 4, entry no. 6 (chromatogram and mass peaks)

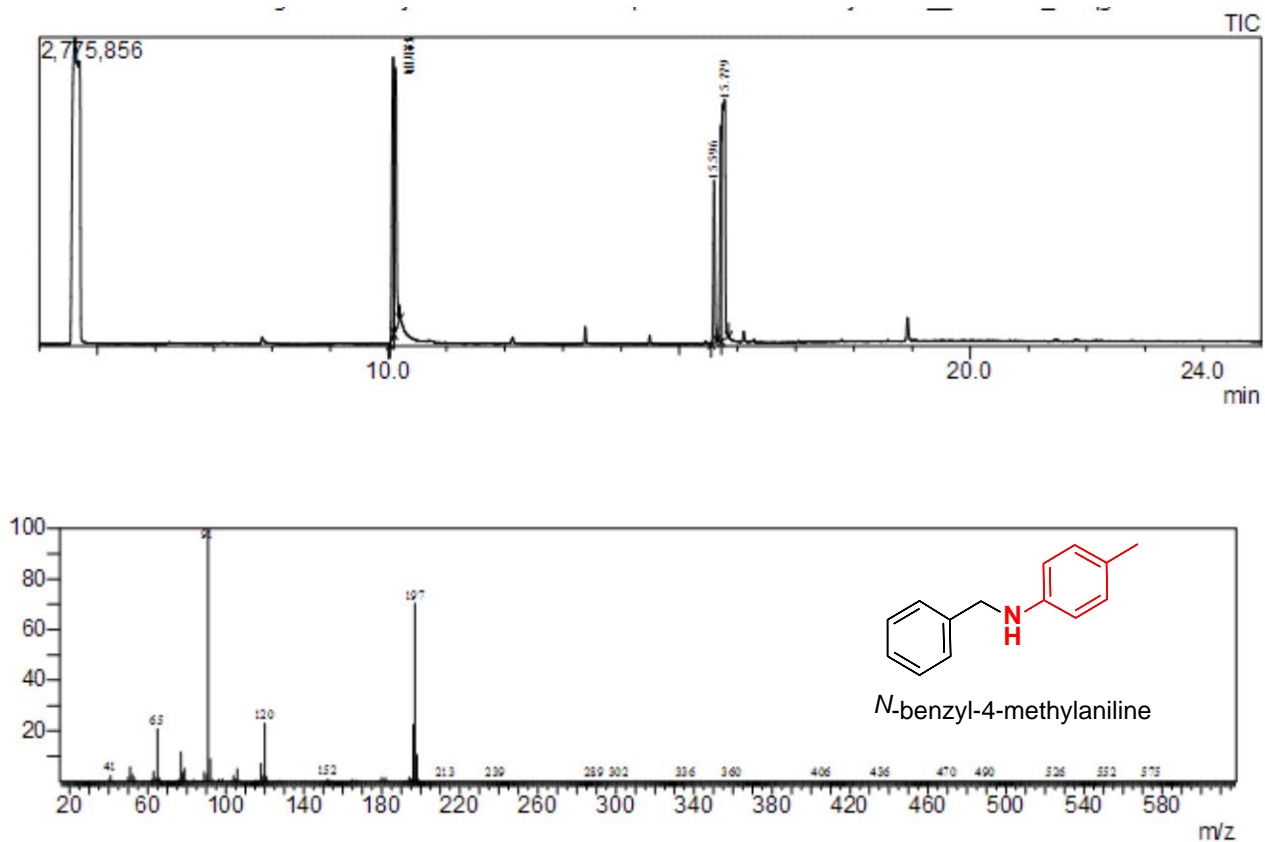

**Fig. S40.** GCMS of table 4, entry no. 7 (chromatogram and mass peaks)

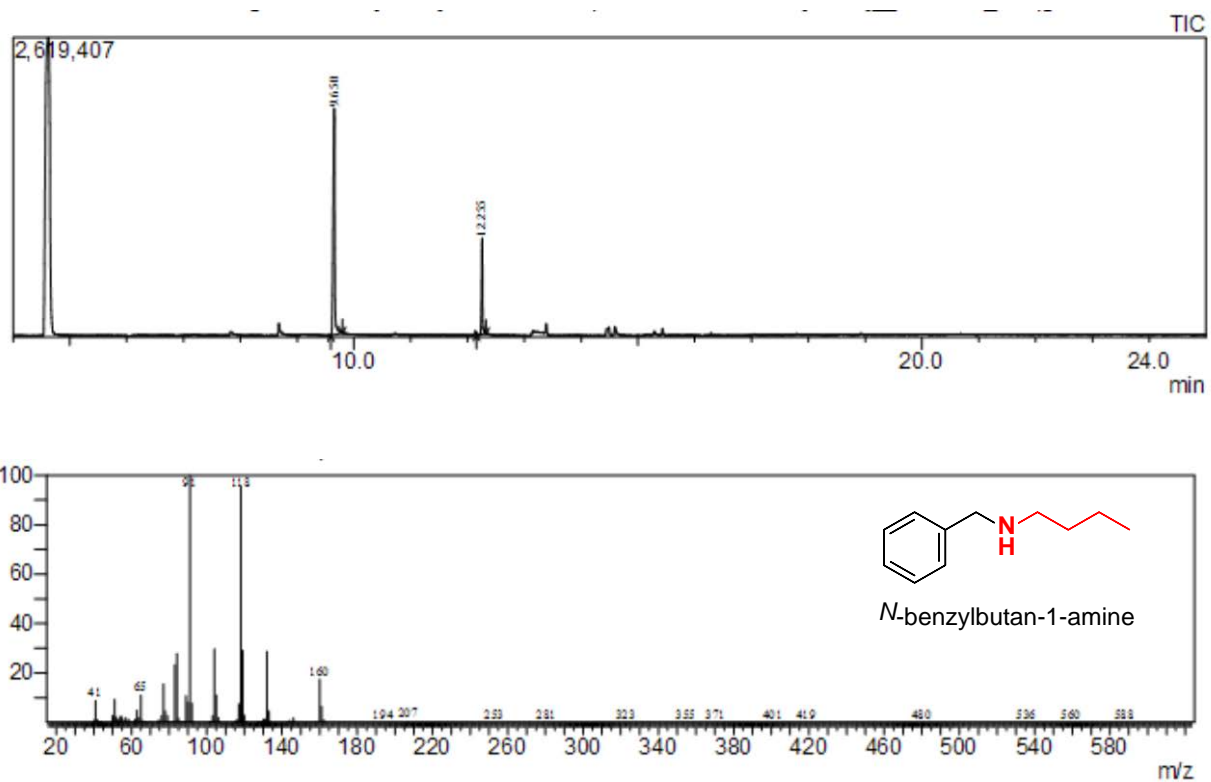

**Fig. S41.** GCMS of table 4, entry no. 8 (chromatogram and mass peaks)



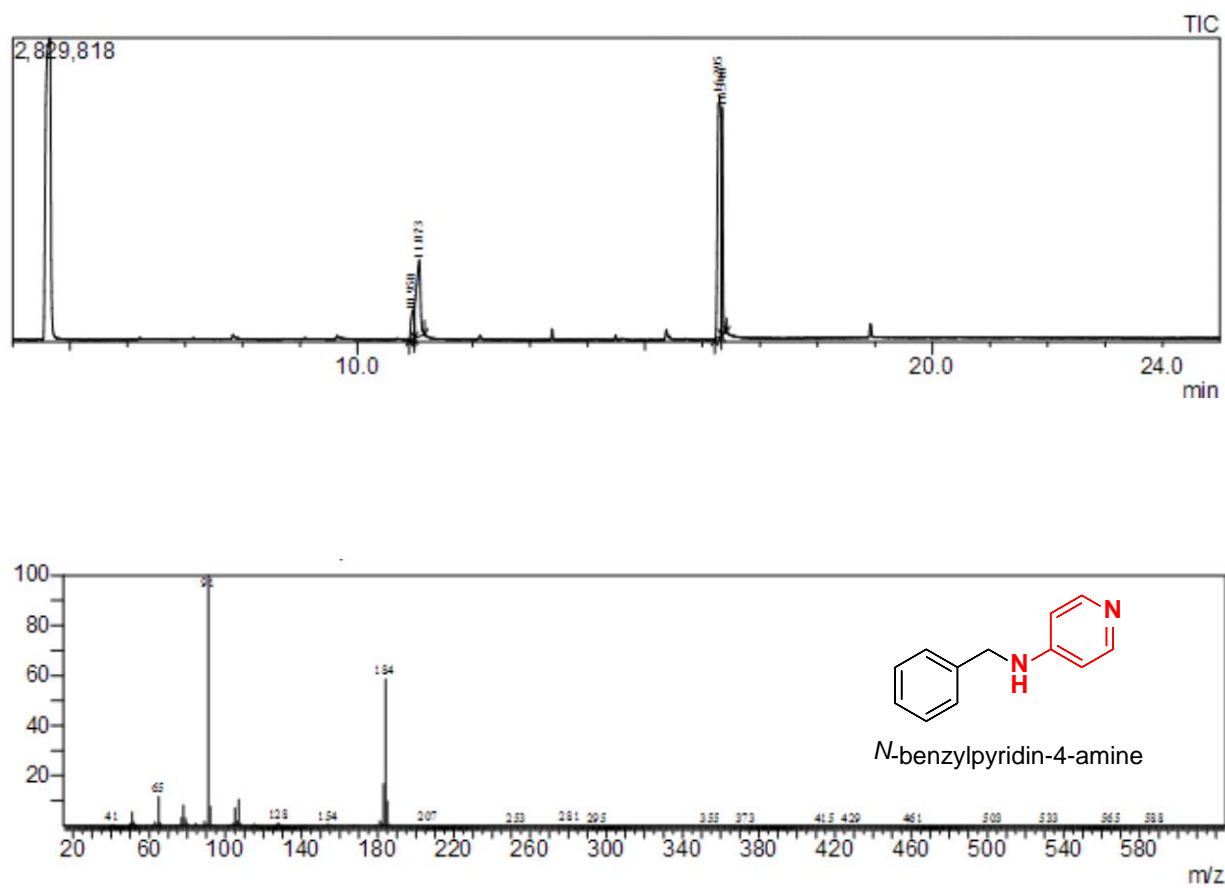

**Fig. S42.** GCMS of table 4, entry no. 11 (chromatogram and mass peaks)

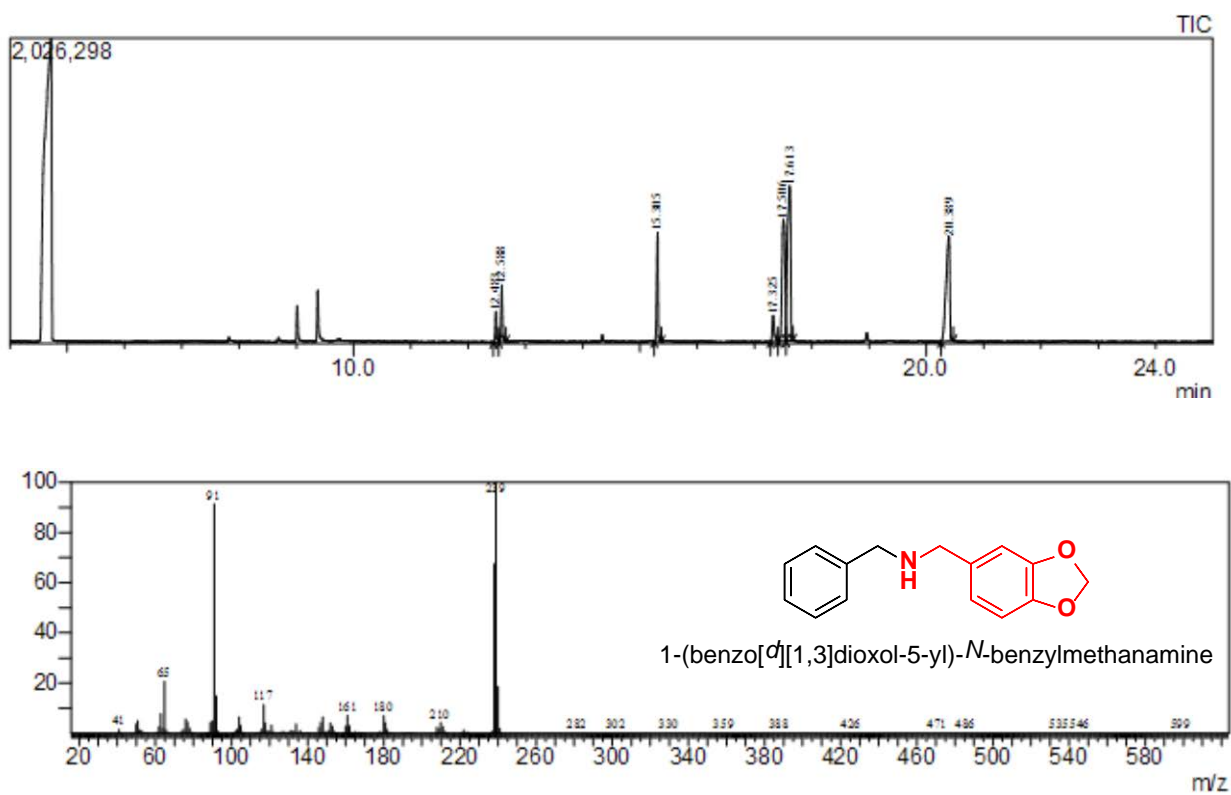

**Fig. S43.** GCMS of table 4, entry no. 12 (chromatogram and mass peaks)

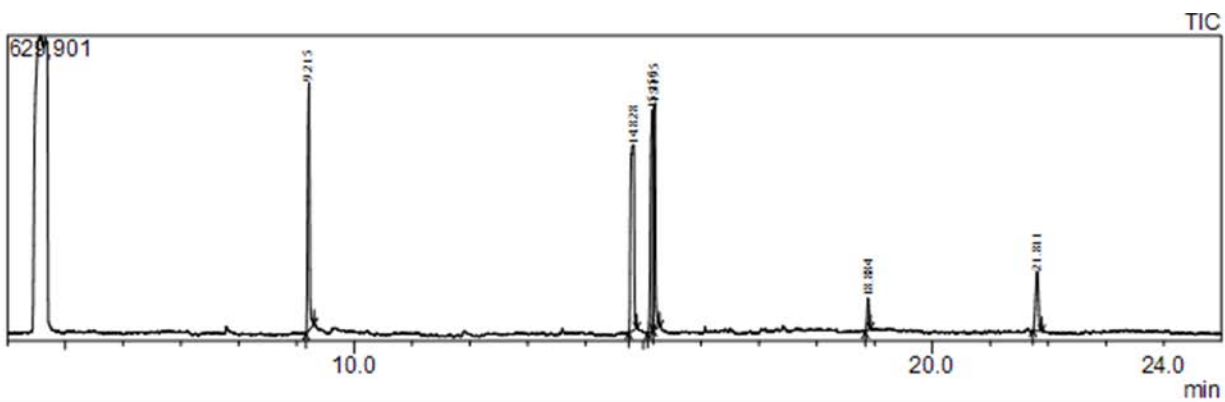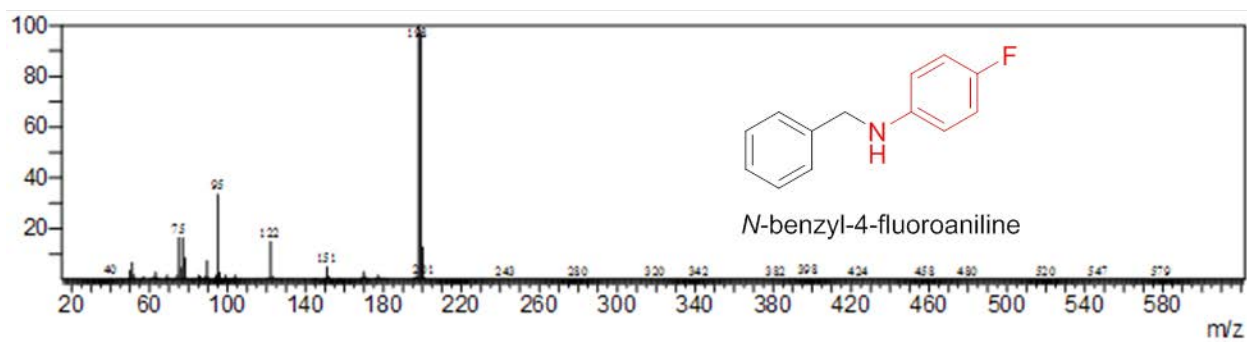

**Fig. S44.** GCMS of table 4, entry no. 13 (chromatogram and mass peaks)

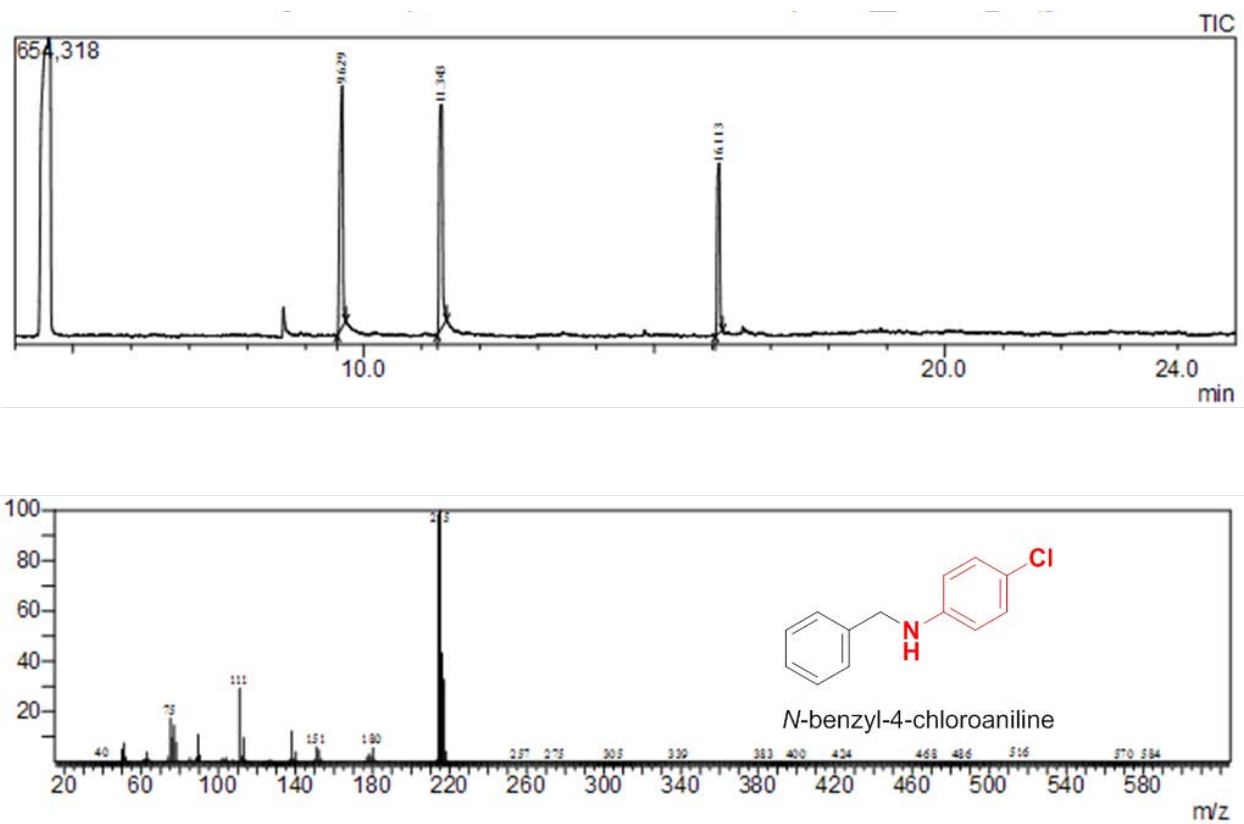

**Fig. S45.** GCMS of table 4, entry no. 14 (chromatogram and mass peaks)

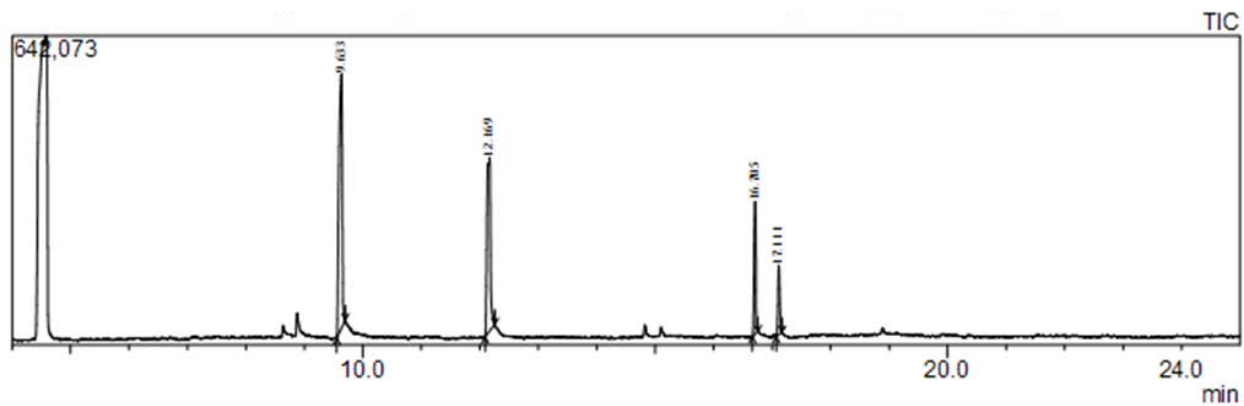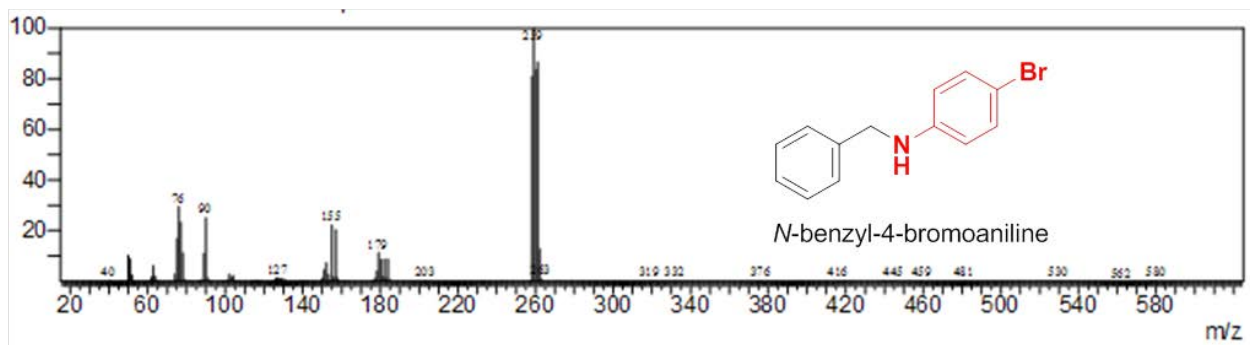

**Fig. S46.** GCMS of table 4, entry no. 15 (chromatogram and mass peaks)

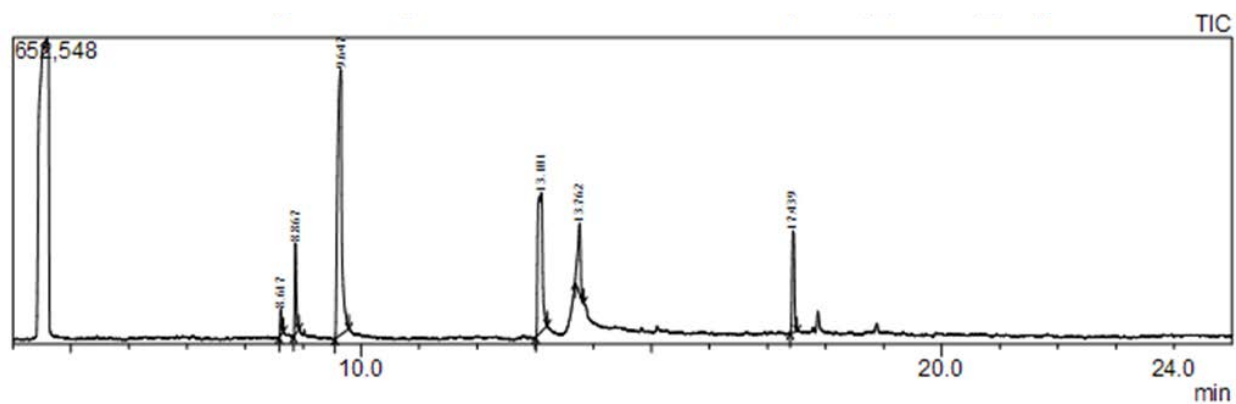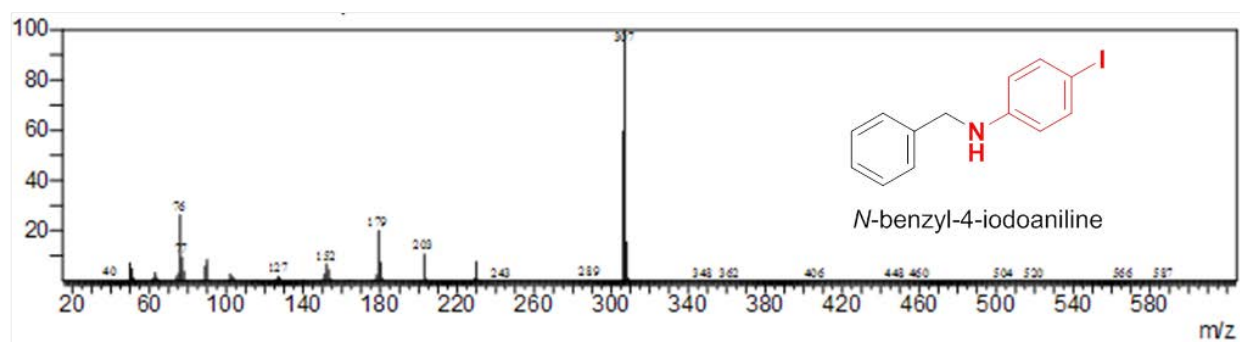

**Fig. S47.** GCMS of table 4, entry no. 16 (chromatogram and mass peaks)

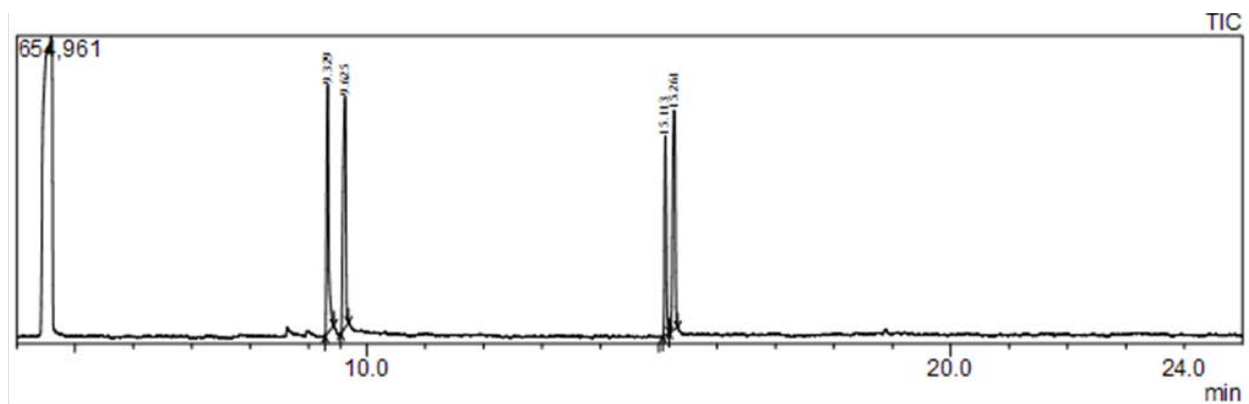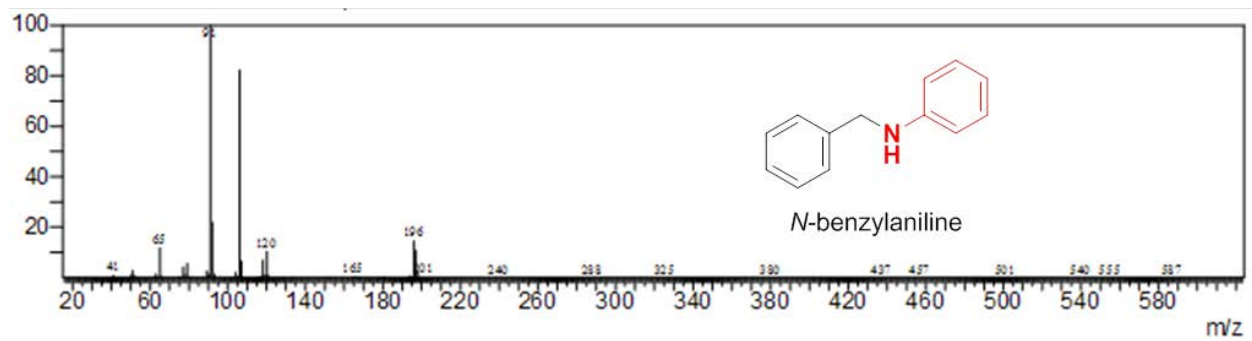

**Fig. S48.** GCMS of table 4, entry no. 17 (chromatogram and mass peaks)

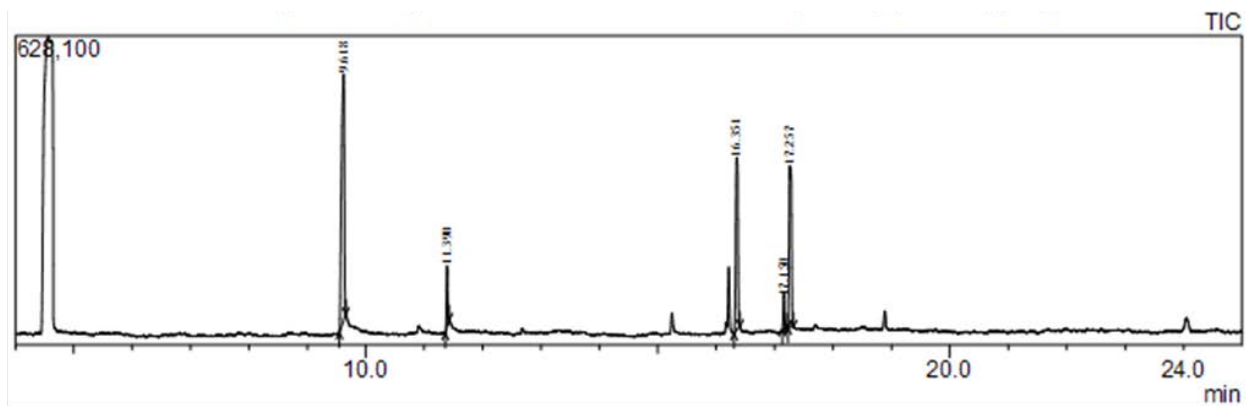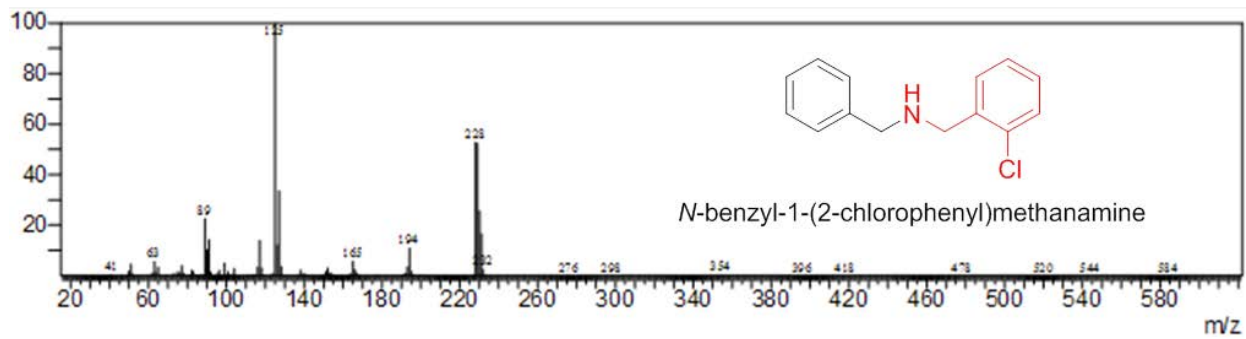

**Fig. S49.** GCMS of table 4, entry no. 18 (chromatogram and mass peaks)



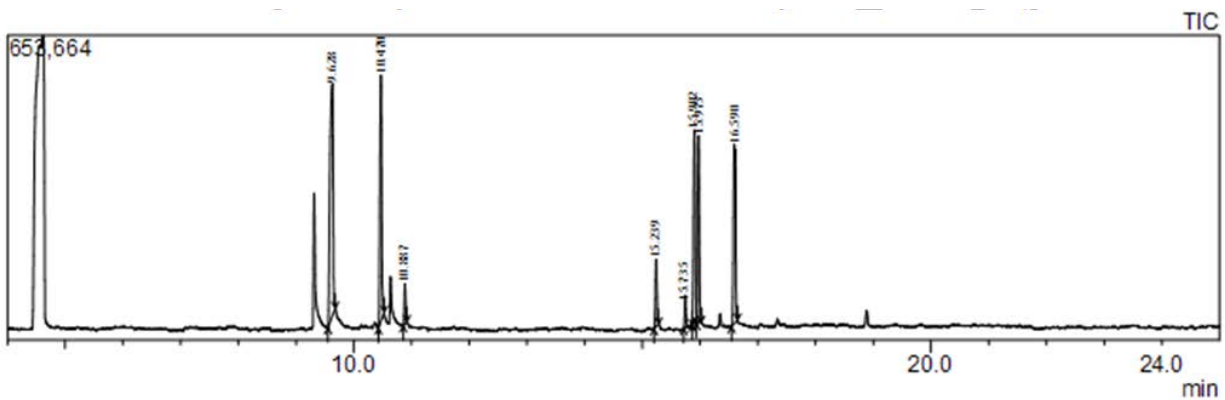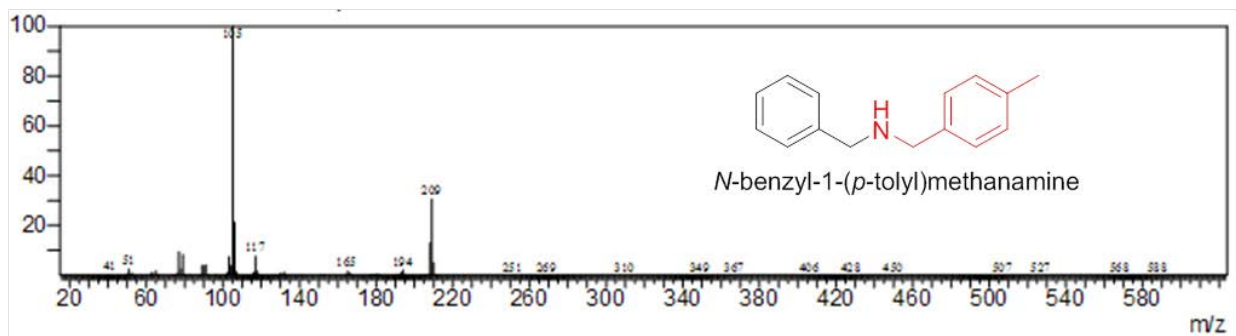

**Fig. S50.** GCMS of table 4, entry no. 19 (chromatogram and mass peaks)

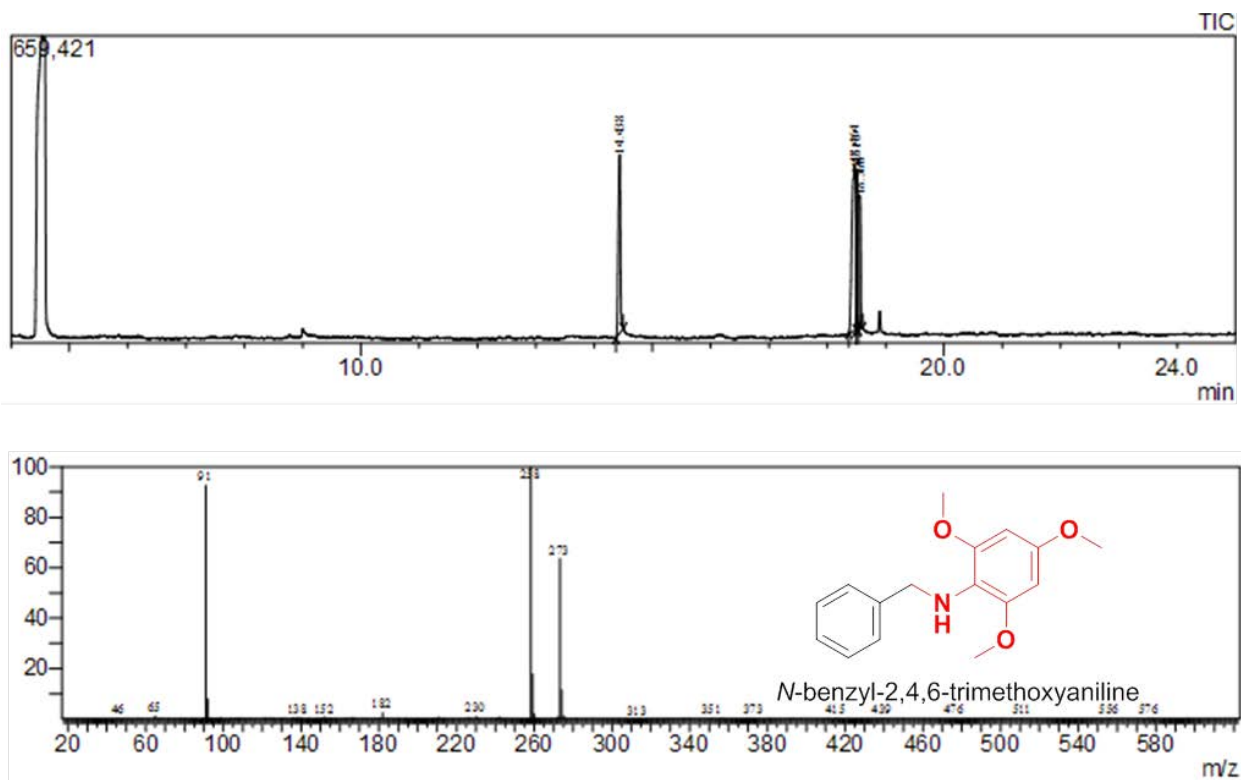

**Fig. S51.** GCMS of table 4, entry no. 20 (chromatogram and mass peaks)

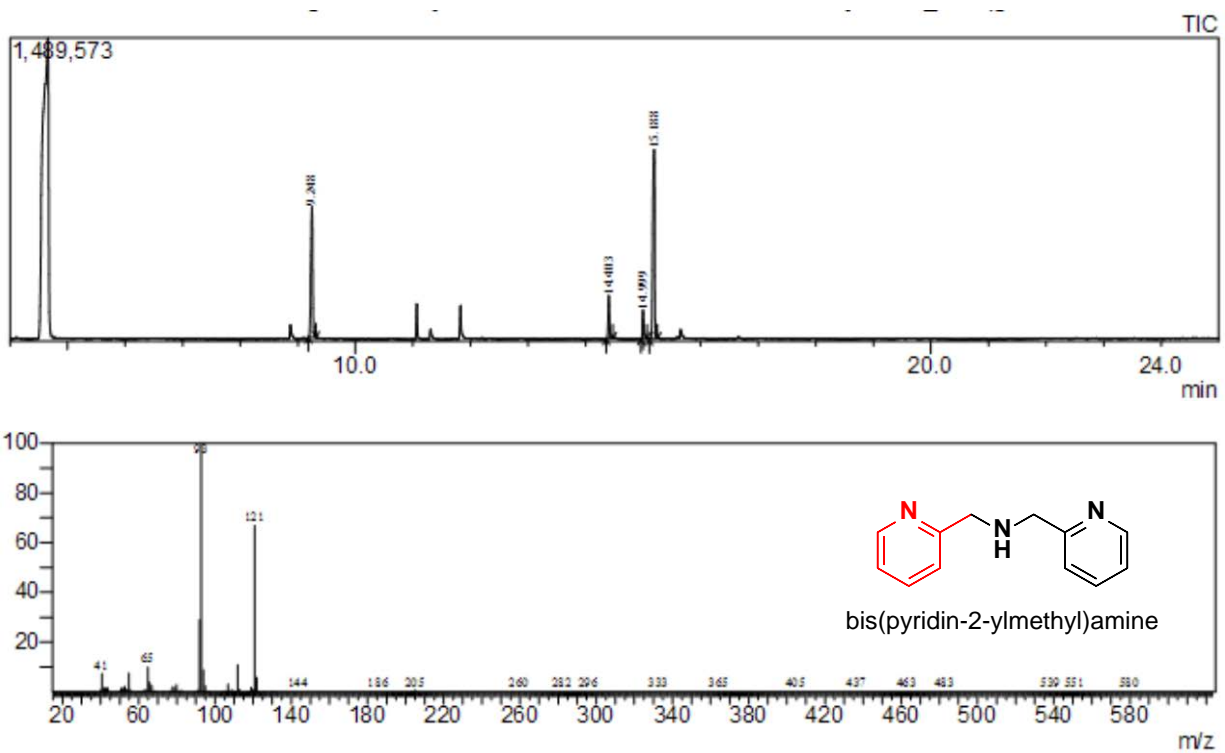

**Fig. S52.** GCMS of table 5, entry no. 1 (chromatogram and mass peaks)

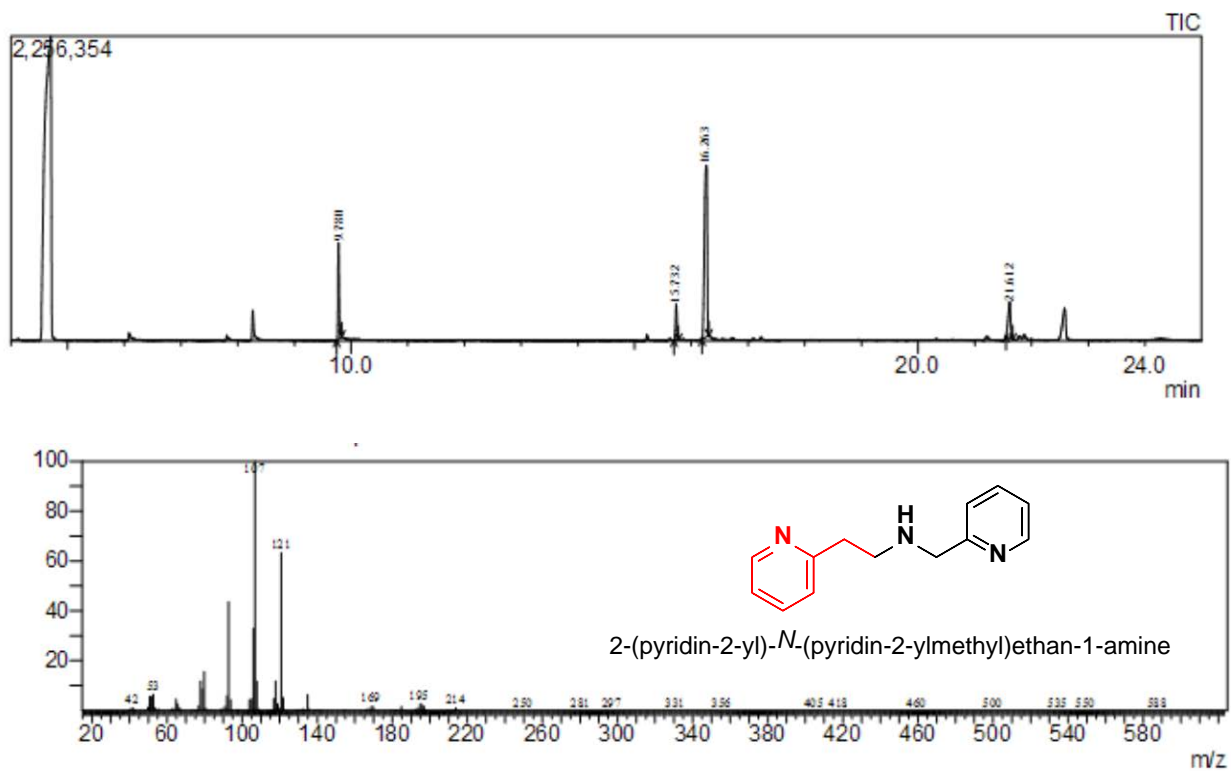

**Fig. S53.** GCMS of table 5, entry no. 2 (chromatogram and mass peaks)

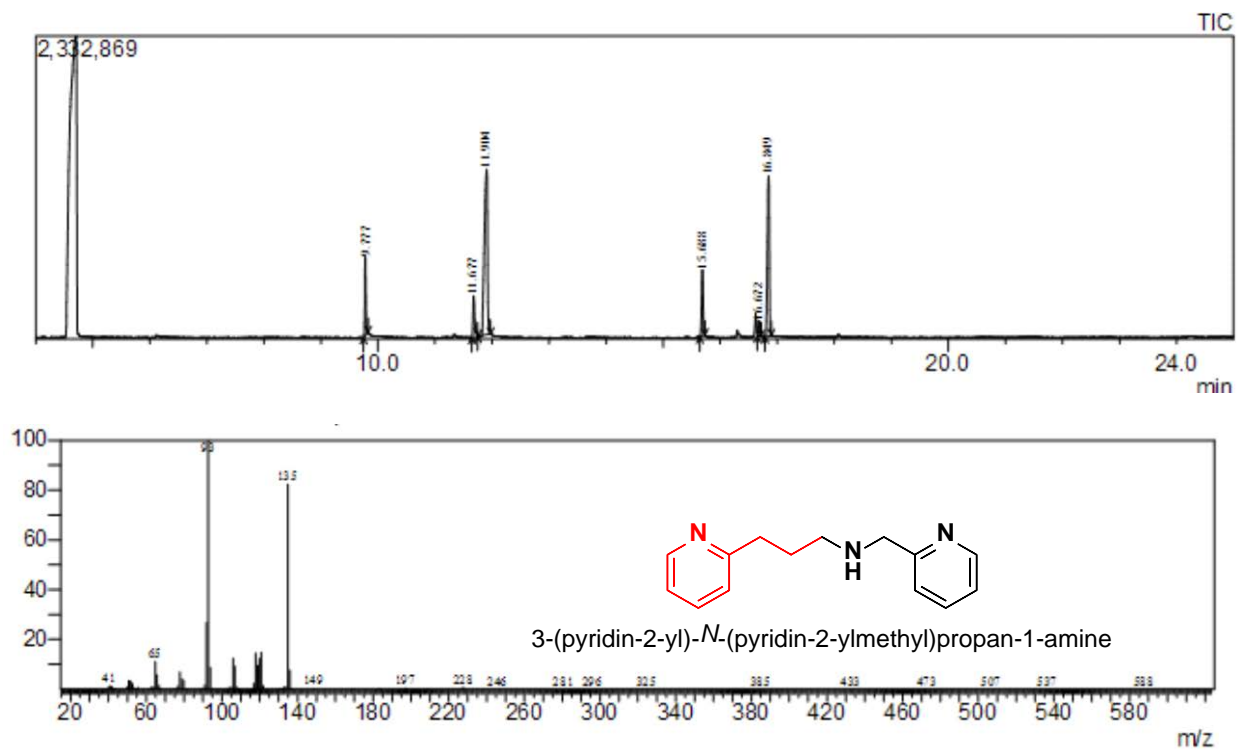

**Fig. S54.** GCMS of table 5, entry no. 3 (chromatogram and mass peaks)

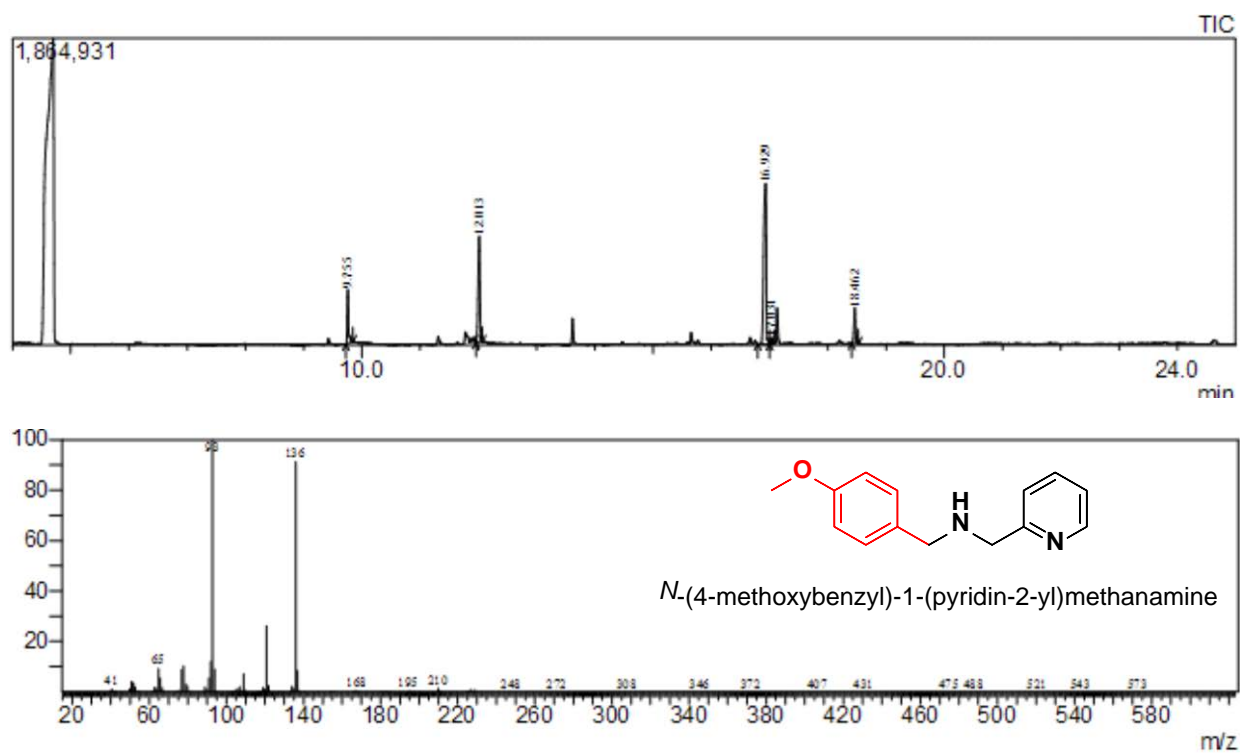

**Fig. S55.** GCMS of table 5, entry no. 4 (chromatogram and mass peaks)

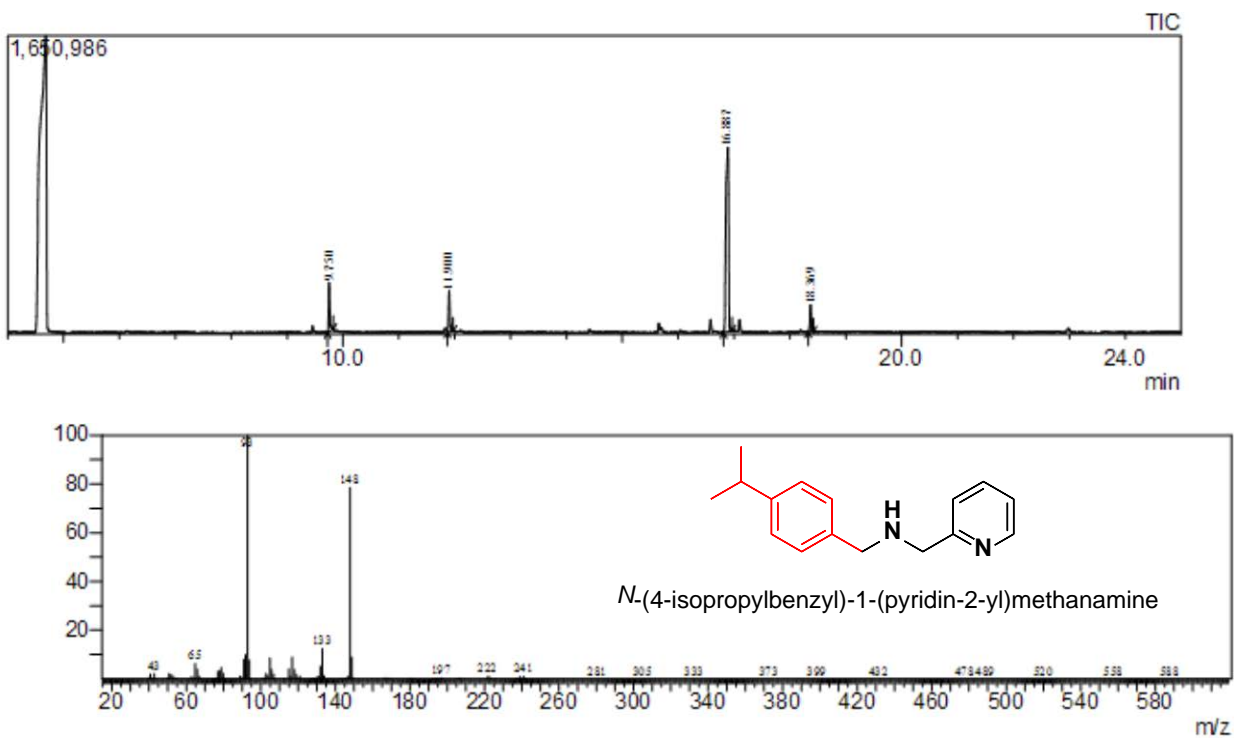

**Fig. S56.** GCMS of table 5, entry no. 5 (chromatogram and mass peaks)

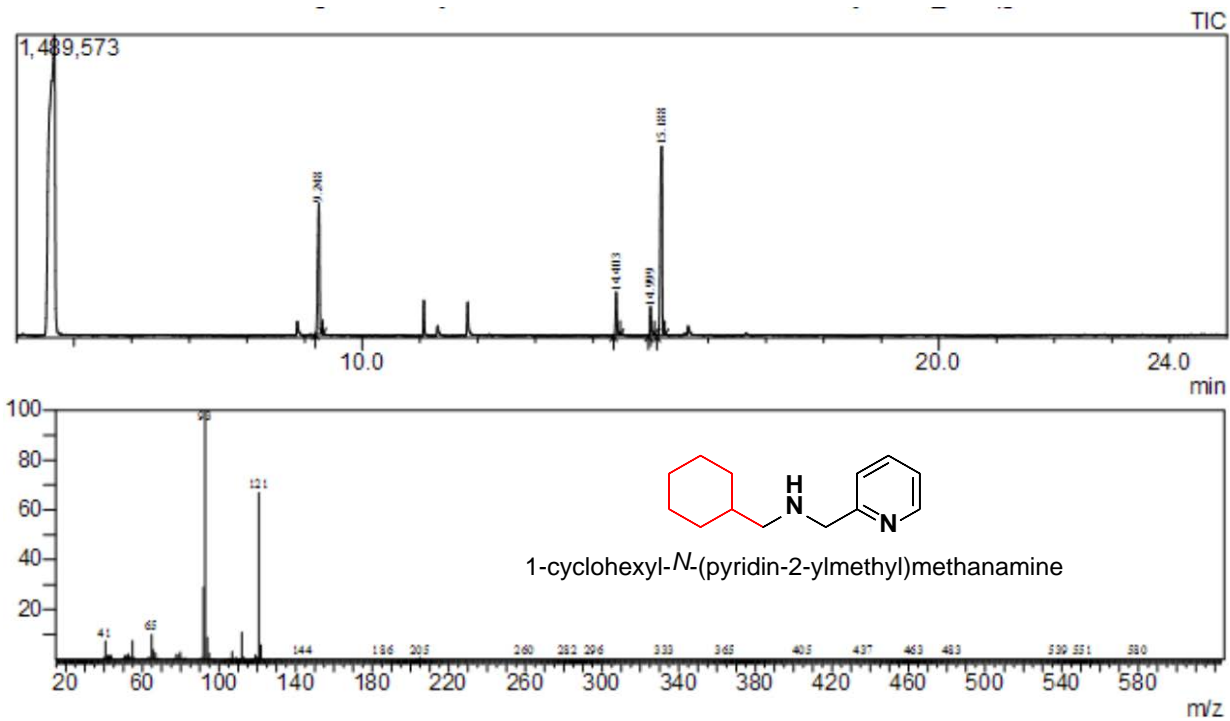

**Fig. S57.** GCMS of table 5, entry no. 6 (chromatogram and mass peaks)



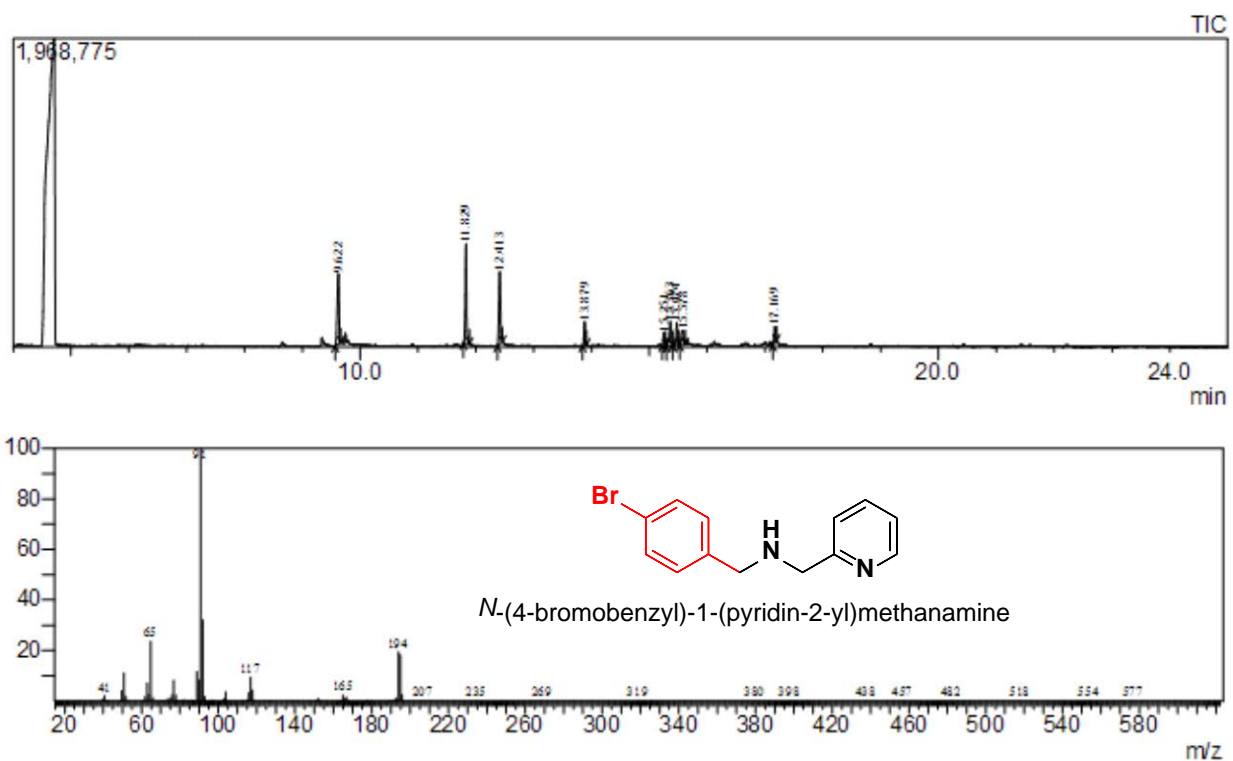

**Fig. S58.** GCMS of table 5, entry no. 7 (chromatogram and mass peaks)

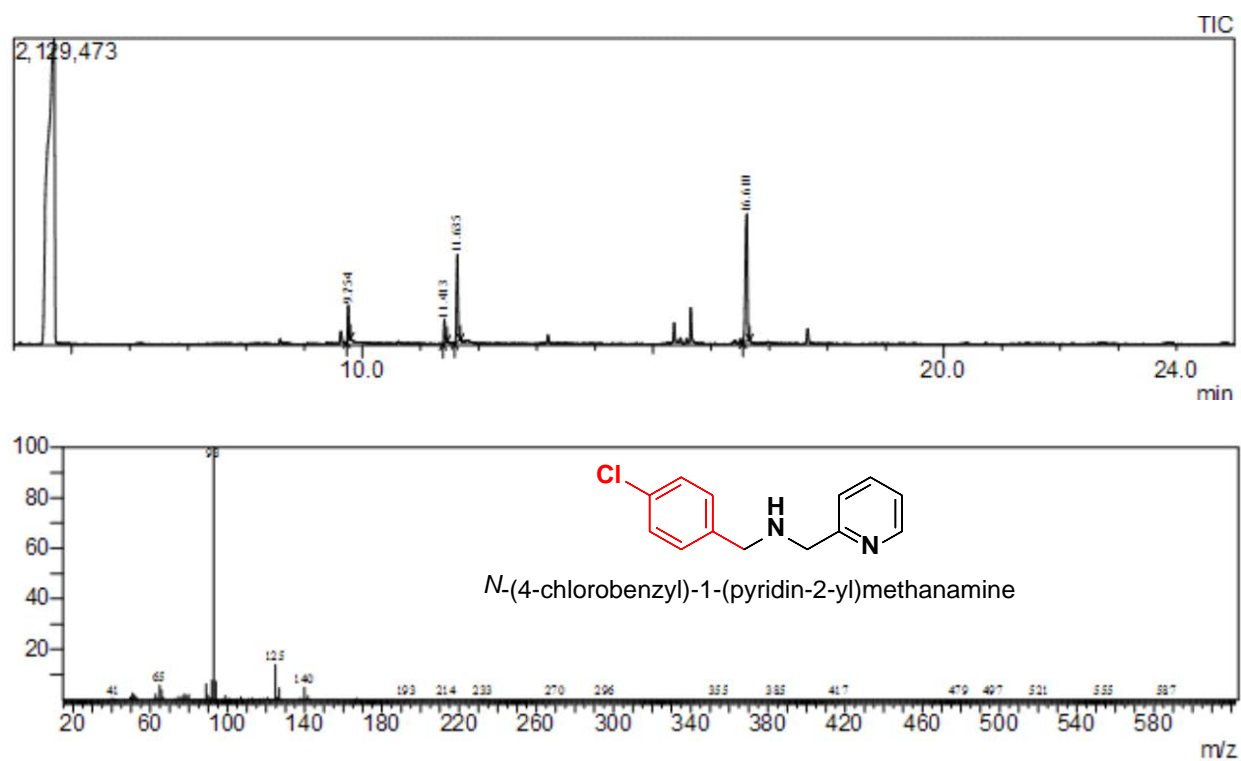

**Fig. S59.** GCMS of table 5, entry no. 8 (chromatogram and mass peaks)

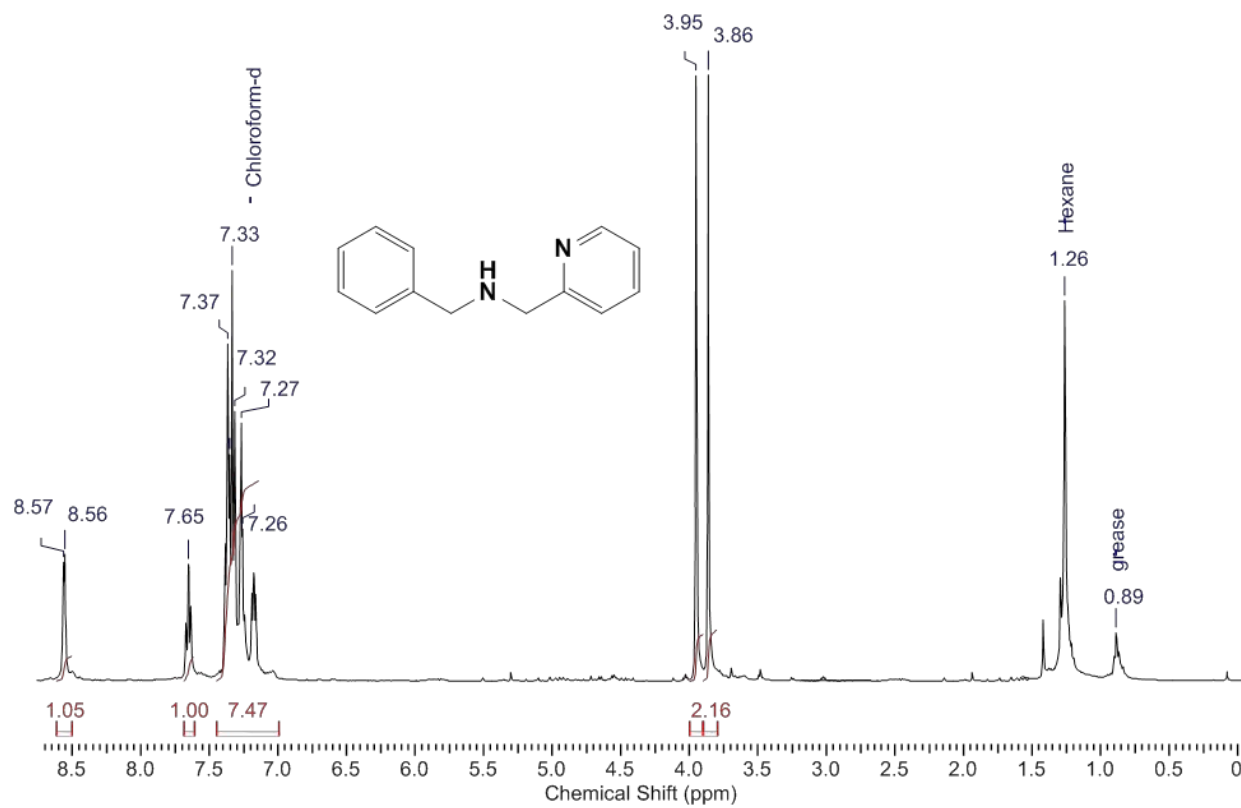

$^1\text{H NMR}$  (400 MHz,  $\text{CDCl}_3$ ):  $\delta$  (ppm) = 8.56 (t, 1H), 7.65 (t, 1H), 7.37–7.27 (m, 7H), 3.95 (s, 2H), 3.86 (s, 2H)

**Fig. S60.**  $^1\text{H NMR}$  of N-benzyl-1-(pyridin-2-yl)methanamine (Table 6, entry 1)

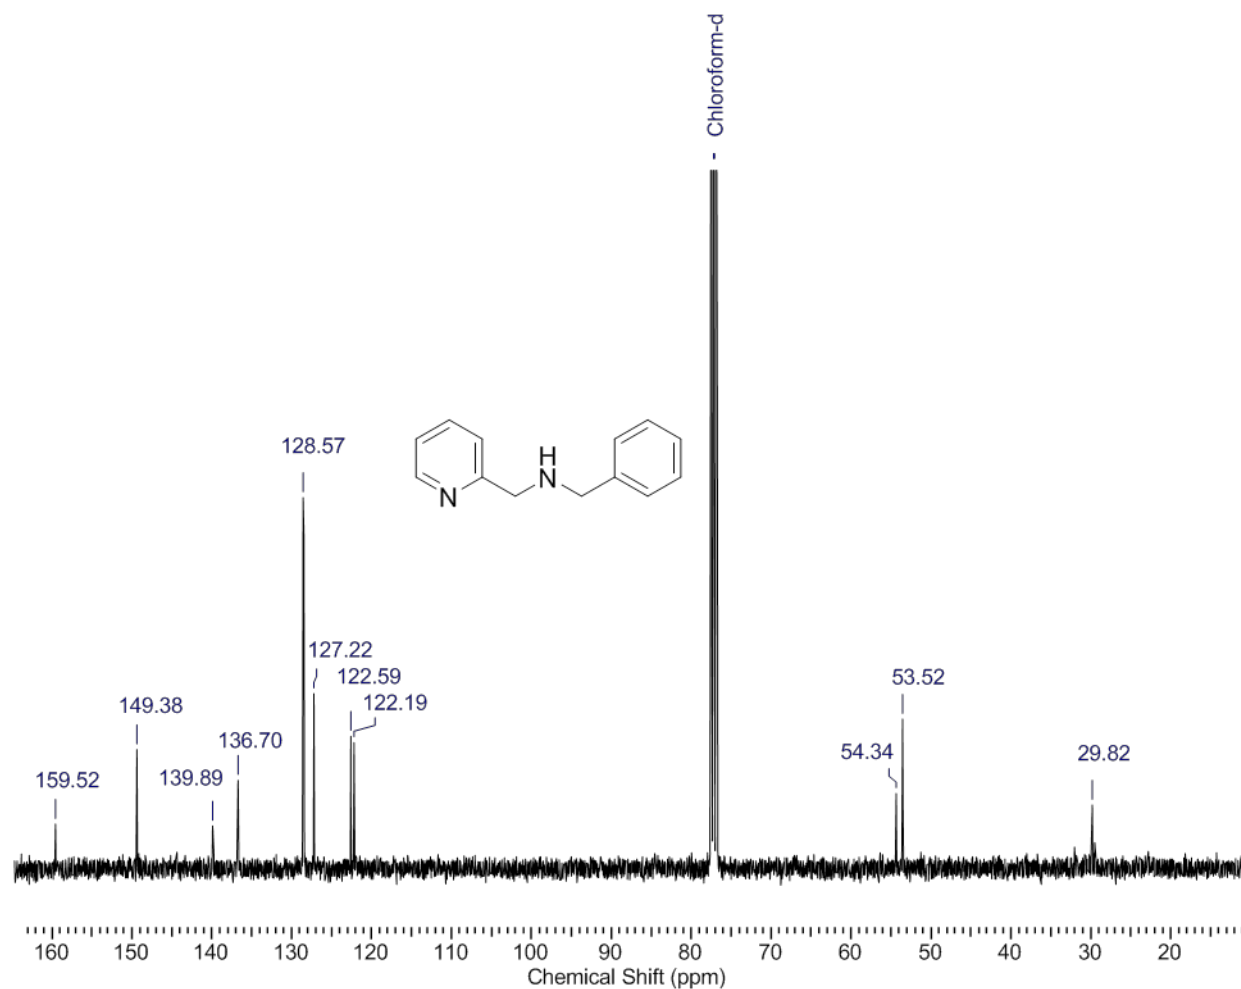

$^{13}\text{C}$  NMR (400 MHz,  $\text{CDCl}_3$ ):  $\delta$  (ppm) = 159.5, 149.4, 139.9, 136.7, 128.6, 127.2, 122.6, 122.2, 54.3, 53.5, 29.3

**Fig. S61.**  $^{13}\text{C}$  NMR of N-benzyl-1-(pyridin-2-yl)methanamine (Table 4, entry 1)

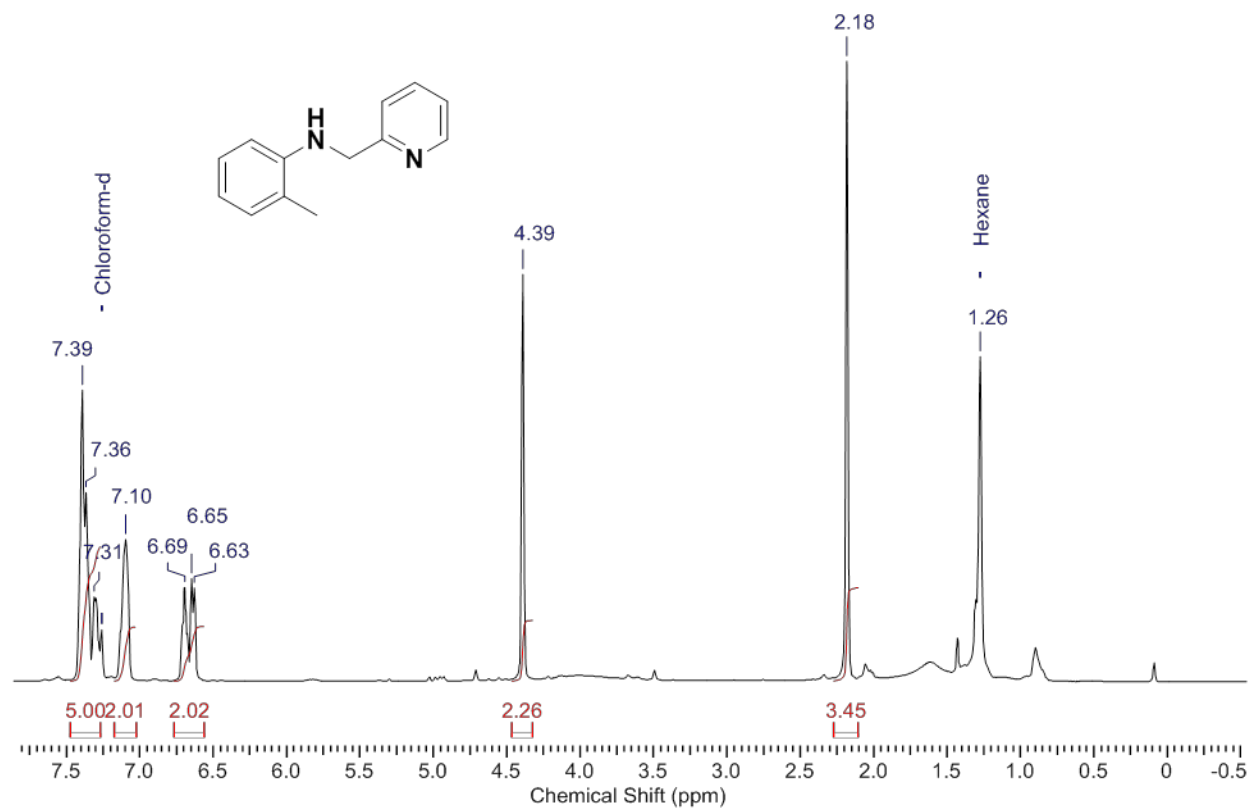

$^1\text{H NMR}$  (400 MHz,  $\text{CDCl}_3$ ):  $\delta$  (ppm) = 7.39–7.31 (m, 5H), 7.10 (s, 2H), 6.69–6.65 (dt, 2H), 4.39 (s, 2H), 2.35 (s, 3H)

**Fig. S62.**  $^1\text{H NMR}$  of o-toluidine (Table 4, entry 4)

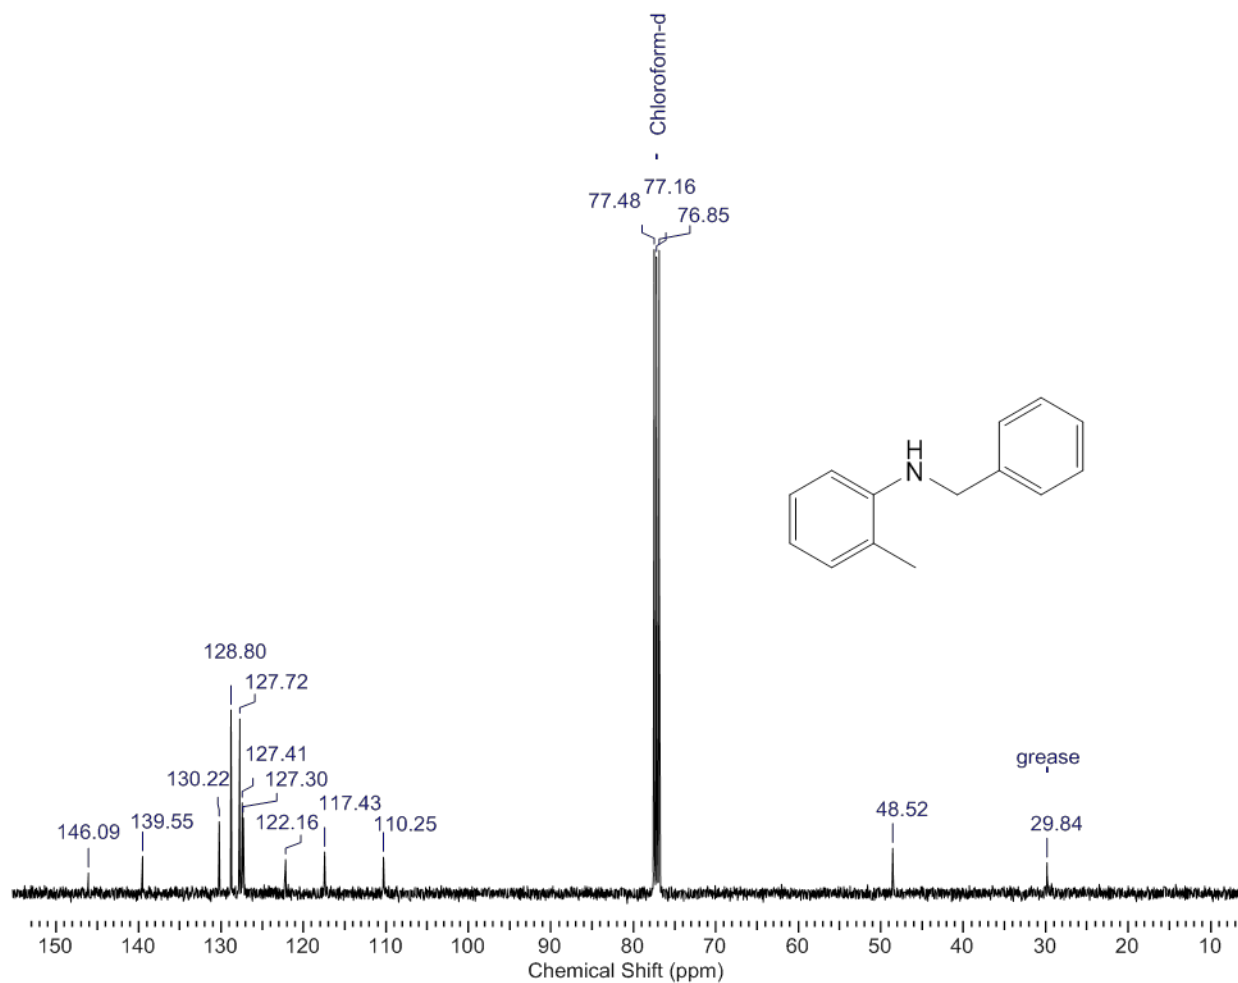

$^{13}\text{C}$  NMR (400 MHz,  $\text{CDCl}_3$ ):  $\delta$  (ppm) = 146.0, 139.5, 130.2, 128.8, 127.7, 127.4, 127.3, 122.16, 117.4, 110.2, 48.5

**Fig. S63.**  $^{13}\text{C}$  NMR of o-toluidine (Table 4, entry 4)

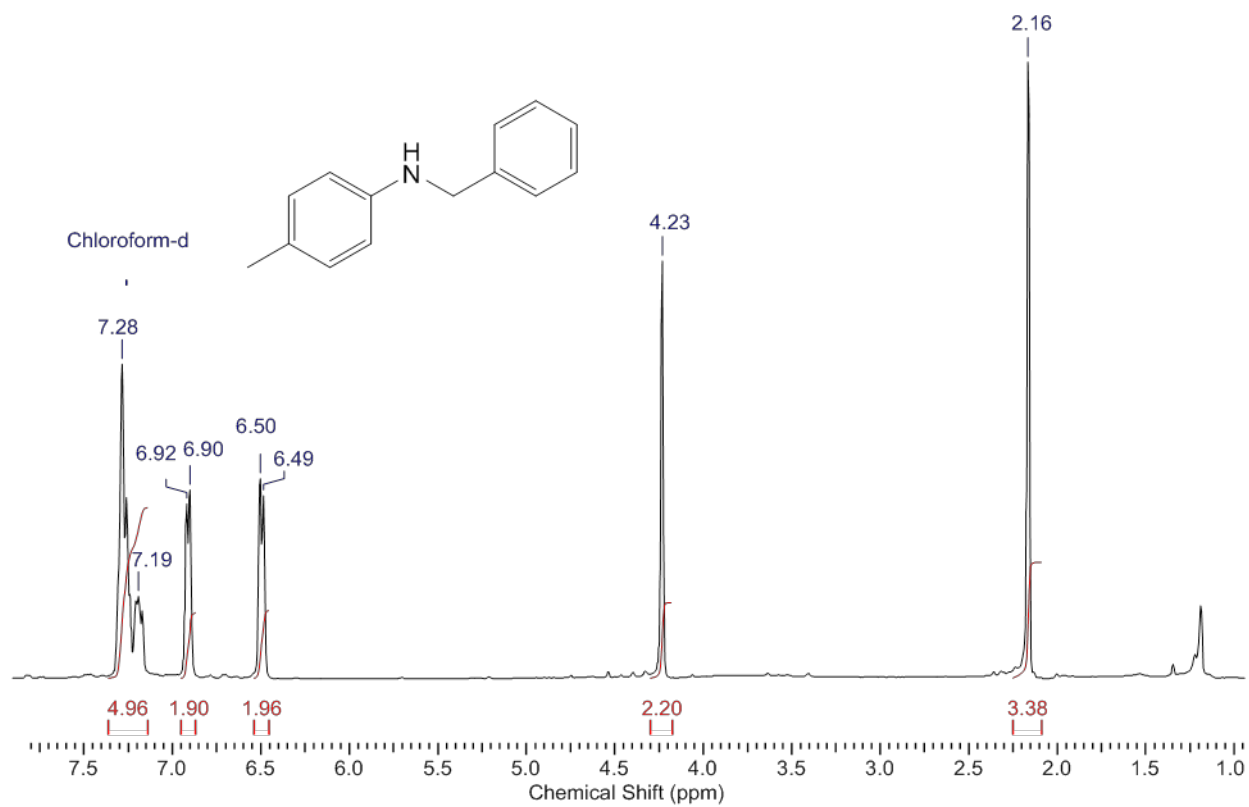

<sup>1</sup>H NMR (400 MHz, CDCl<sub>3</sub>): δ (ppm) = 7.28–7.19 (m, 5H), 6.92 (d, 2H), 6.50 (d, 2H), 4.23 (s, 2H), 2.165 (s, 3H)

**Fig. S64.** <sup>1</sup>H NMR of p-toluidine (Table 4, entry 7)

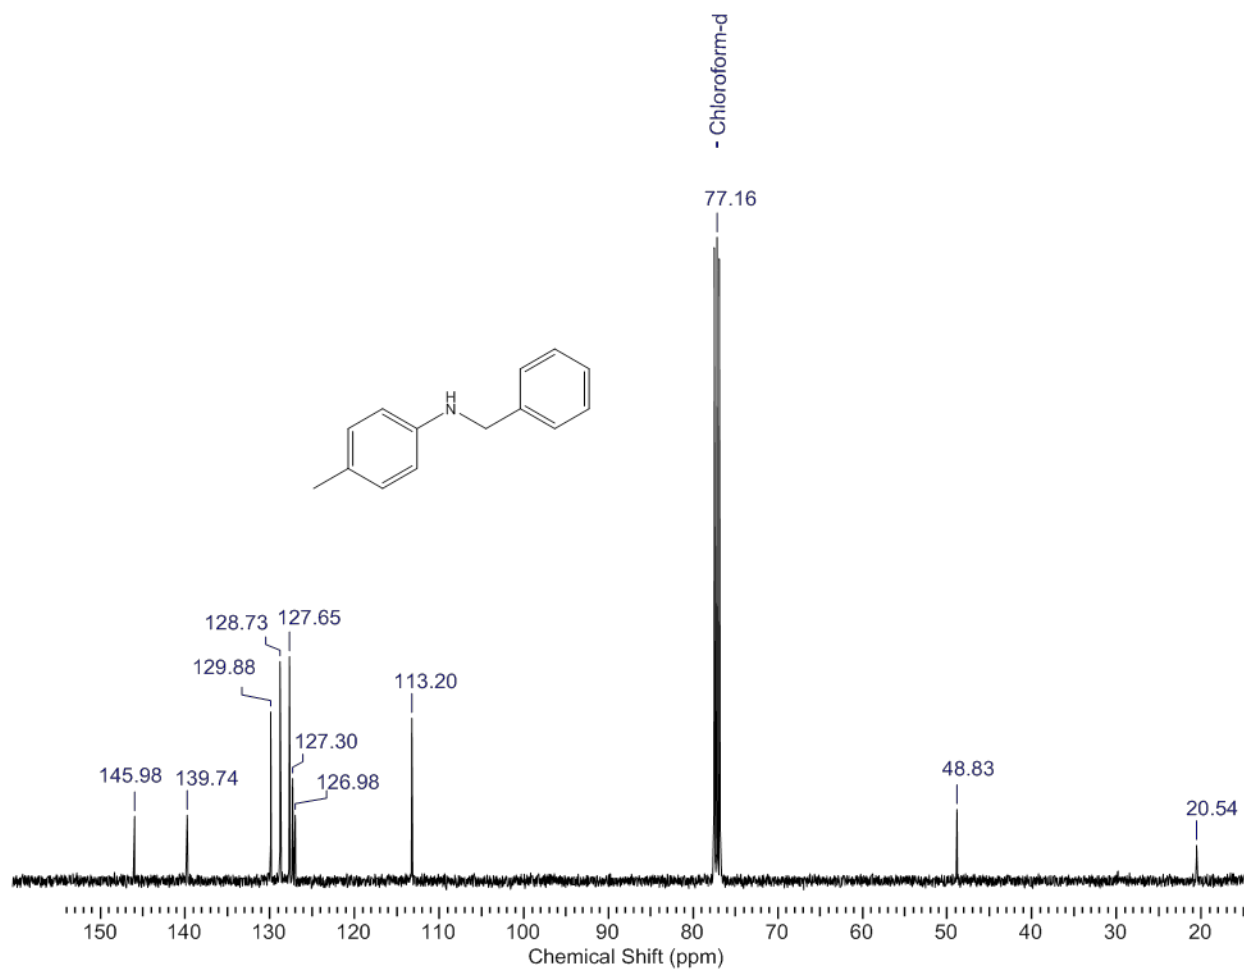

$^{13}\text{C}$  NMR (400 MHz,  $\text{CDCl}_3$ ):  $\delta$  (ppm) = 146.0, 139.7, 129.9, 128.7, 127.7, 127.3, 127.0, 113.2, 48.8, 20.5.

**Fig. S65.**  $^{13}\text{C}$  NMR of p-toluidine (Table 4, entry 7)



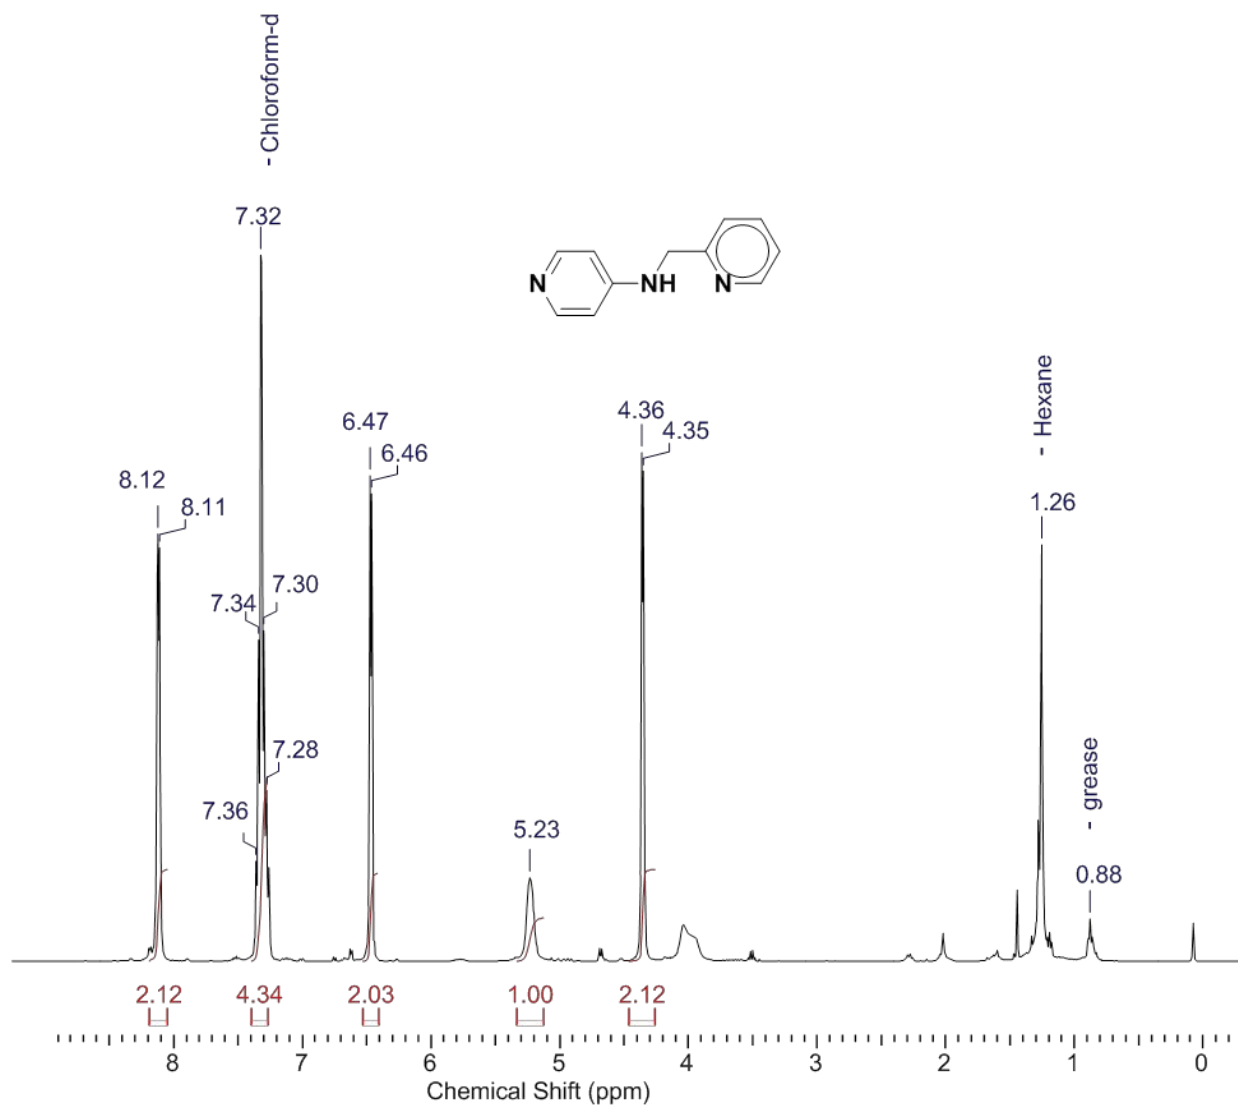

$^1\text{H}$  NMR (400 MHz,  $\text{CDCl}_3$ ):  $\delta$  (ppm) = 8.12 (d, 2H), 7.32 (q, 4H), 6.47 (d, 2H), 5.23 (s, 1H), 4.36 (s, 2H)

**Fig. S66.**  $^1\text{H}$  NMR of N-(pyridin-2-ylmethyl)pyridin-4-amine (Table 4, entry 11)

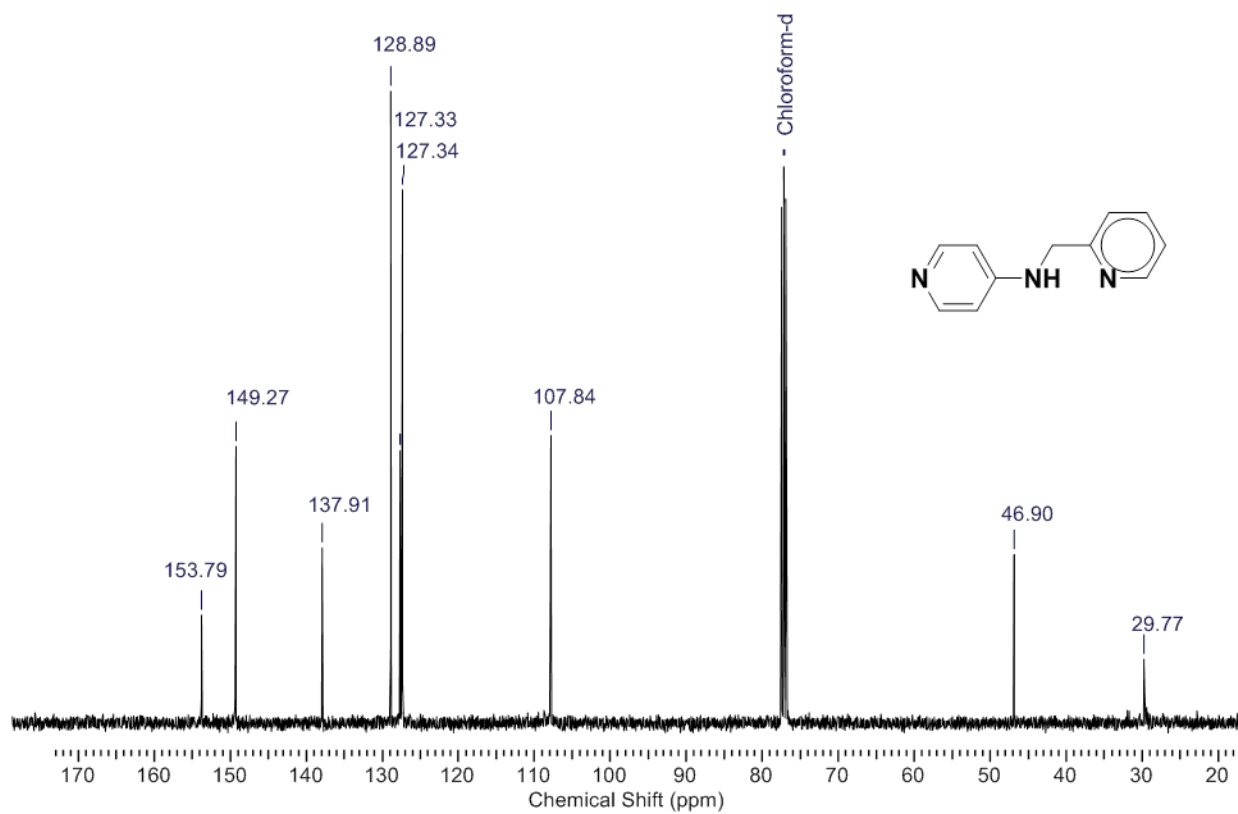

$^{13}\text{C}$  NMR (400 MHz,  $\text{CDCl}_3$ ):  $\delta$  (ppm) = 153.8, 149.3, 137.9, 128.9, 127.3, 127.3, 107.3, 46.9, 29.8

**Fig. S67.**  $^{13}\text{C}$  NMR of N-(pyridin-2-ylmethyl)pyridin-4-amine (Table 4, entry 11)

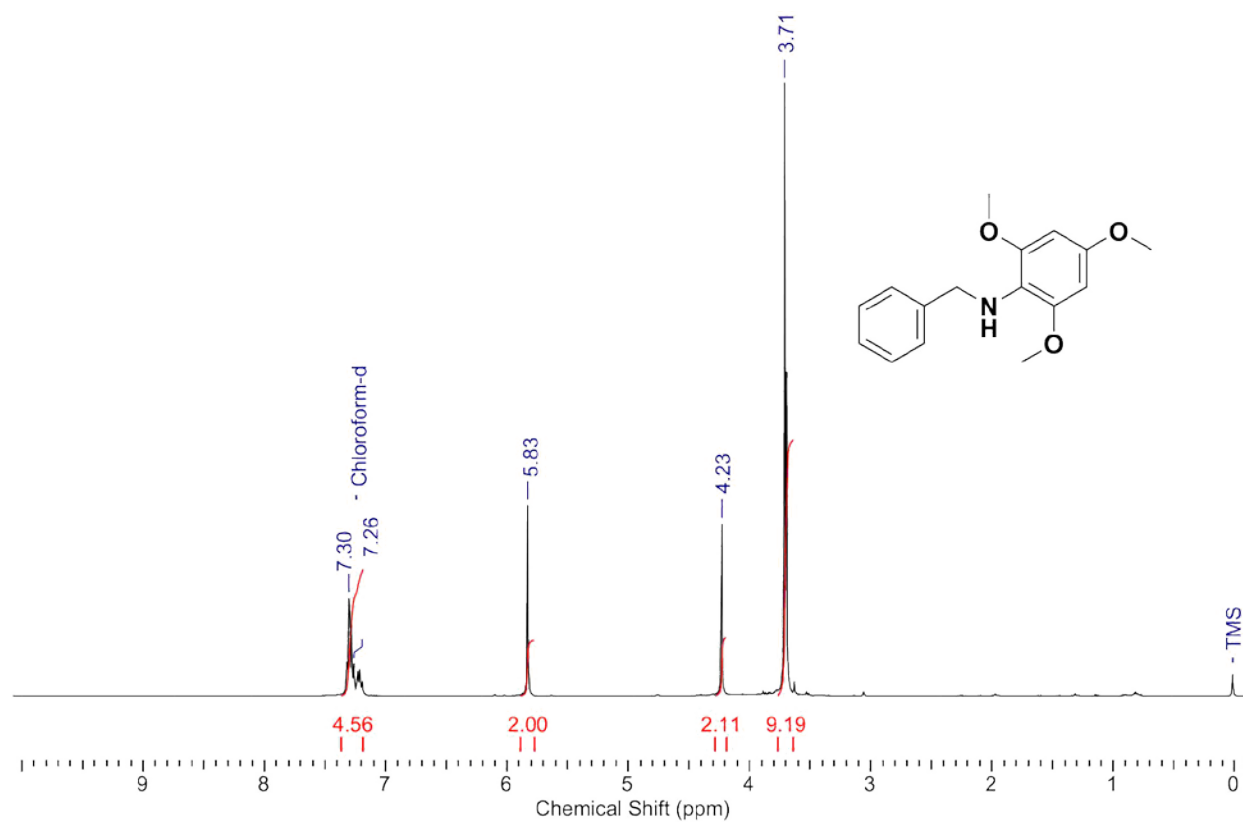

<sup>1</sup>H NMR (400 MHz, CDCl<sub>3</sub>): δ (ppm) = 7.32 (m, 4H), 5.83 (s, 2H), 4.23 (s, 2H), 3.71 (d, 9H)

**Fig. S68.** <sup>1</sup>H NMR of N-benzyl-2,4,6-trimethoxyaniline (Table 4, entry 20)

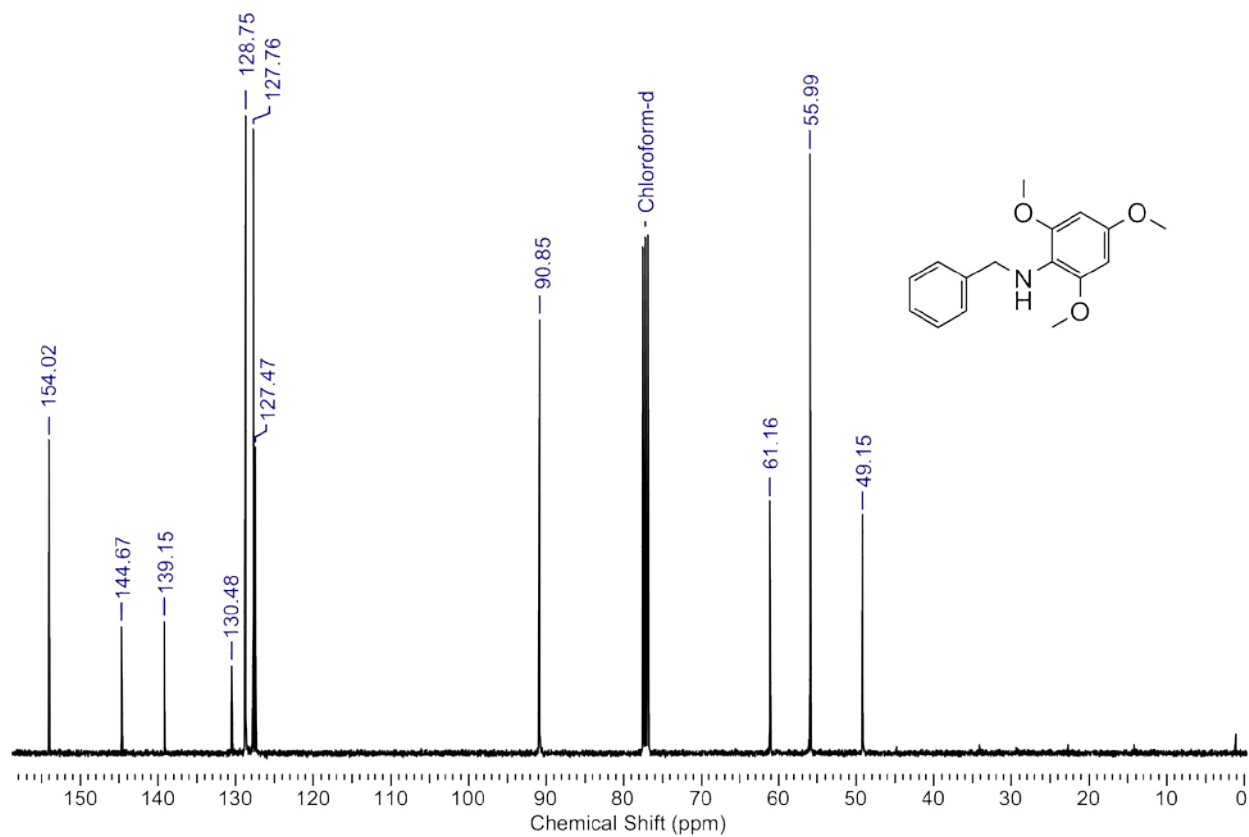

$^{13}\text{C}$  NMR (400 MHz,  $\text{CDCl}_3$ ):  $\delta$  (ppm) = 154.0, 144.7, 139.2, 130.5, 128.75, 127.76, 127.5, 90.9, 61.2, 55.9, 49.2

**Fig. S69.**  $^{13}\text{C}$  NMR of N-benzyl-2,4,6-trimethoxyaniline (Table 4, entry 20)

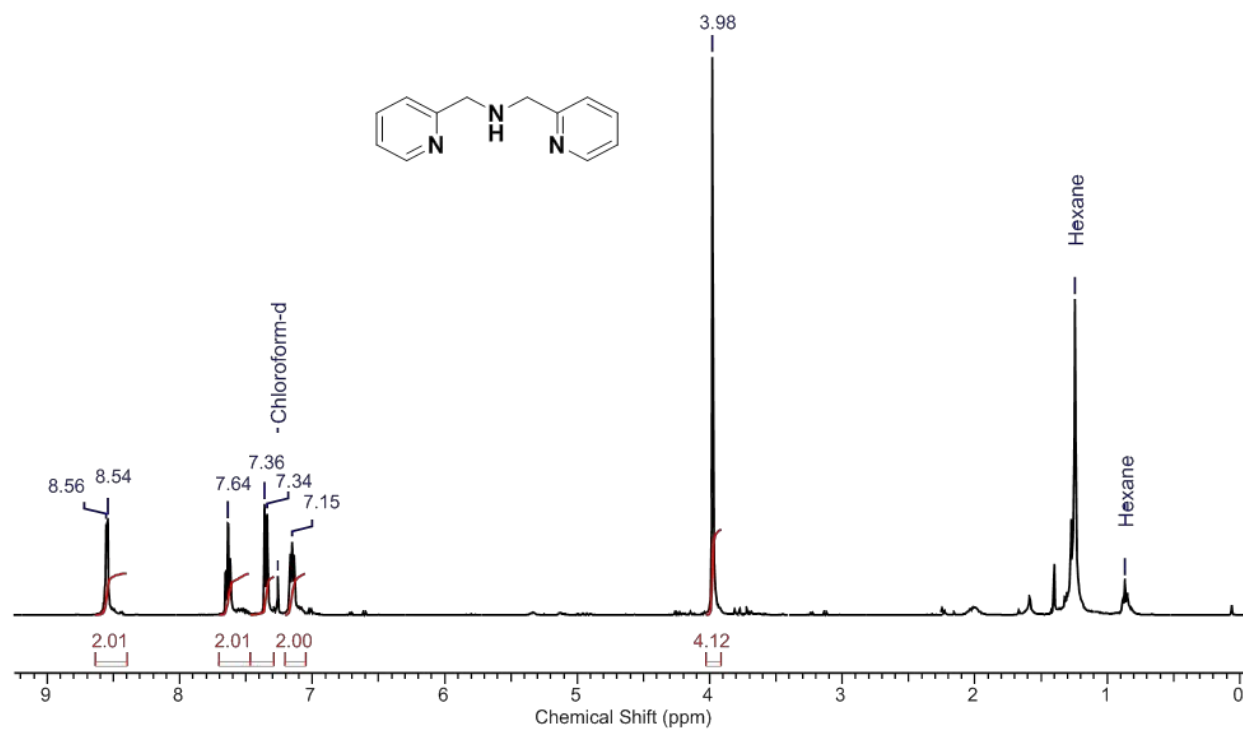

<sup>1</sup>H NMR (400 MHz, CDCl<sub>3</sub>): δ (ppm) = 8.56 (d, 2H), 7.64 (t, 2H), 7.36 (d, 2H), 7.15 (t, 2H), 3.98 (s, 4H)

**Fig. S70.** <sup>1</sup>H NMR of bis(pyridin-2-ylmethyl)amine (Table 5, entry 1)

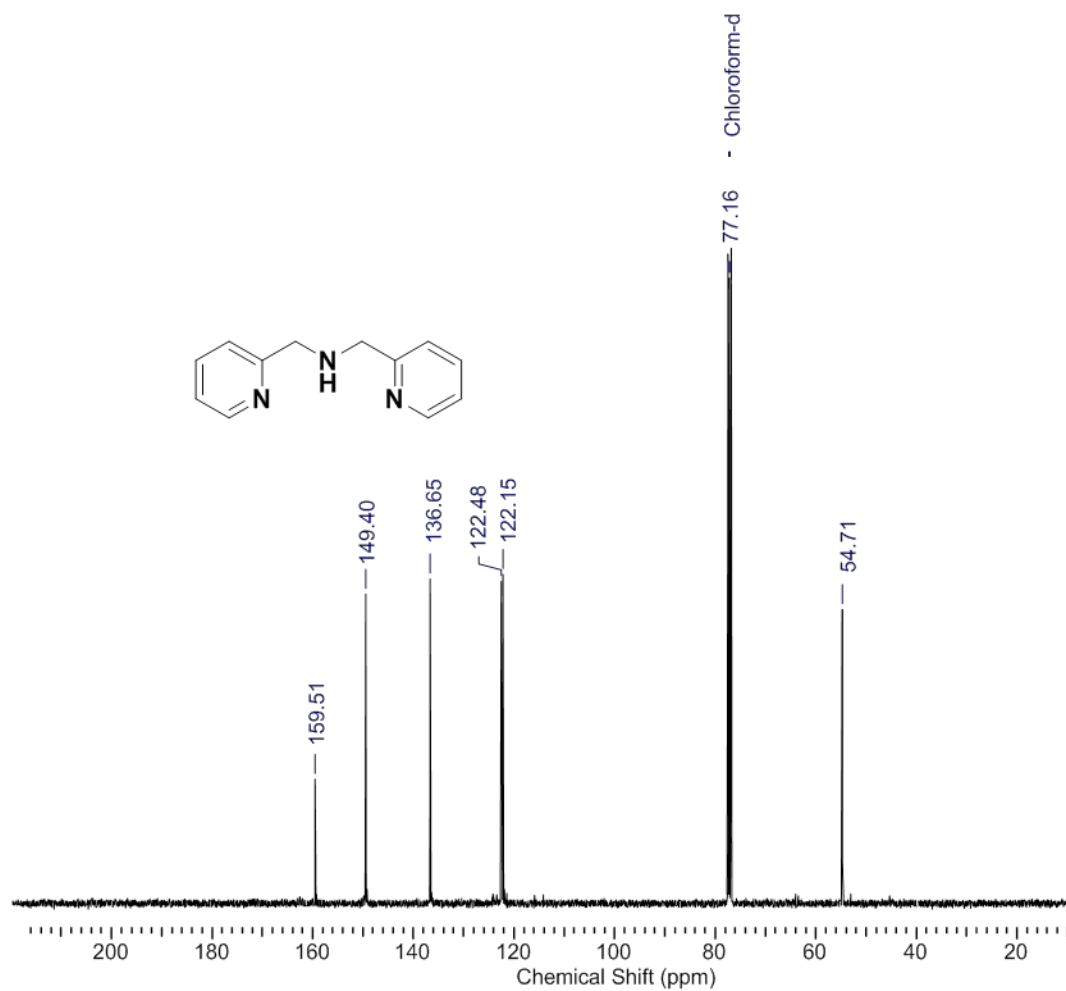

$^{13}\text{C}$  NMR (400 MHz,  $\text{CDCl}_3$ ):  $\delta$  (ppm) = 159.5, 149.4, 136.7, 122.5, 122.2, 54.7

**Fig. S71.**  $^{13}\text{C}$  NMR of bis(pyridin-2-ylmethyl)amine (Table 5, entry 1)

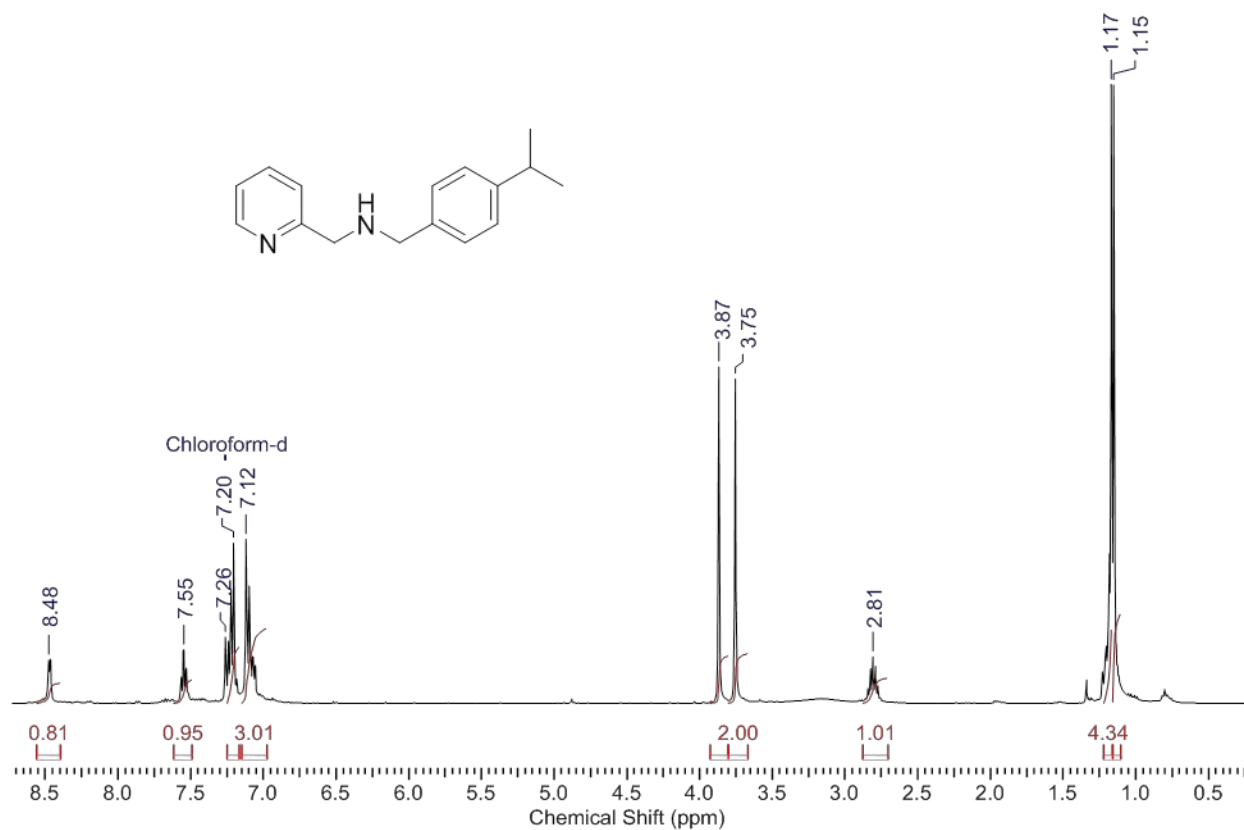

<sup>1</sup>H NMR (400 MHz, CDCl<sub>3</sub>):  $\delta$  (ppm) = 8.48 (d, 1H), 7.55 (d, 1H), 7.20-7.12 (4H), 3.87 (d, 2H), 3.75 (d, 2H), 2.81 (m, 1H), 1.17-1.15 (m, 6H)

**Fig. S72.** <sup>1</sup>H NMR of N-(4-isopropylbenzyl)-1-(pyridin-2-yl)methanamine (Table 5, entry 5)

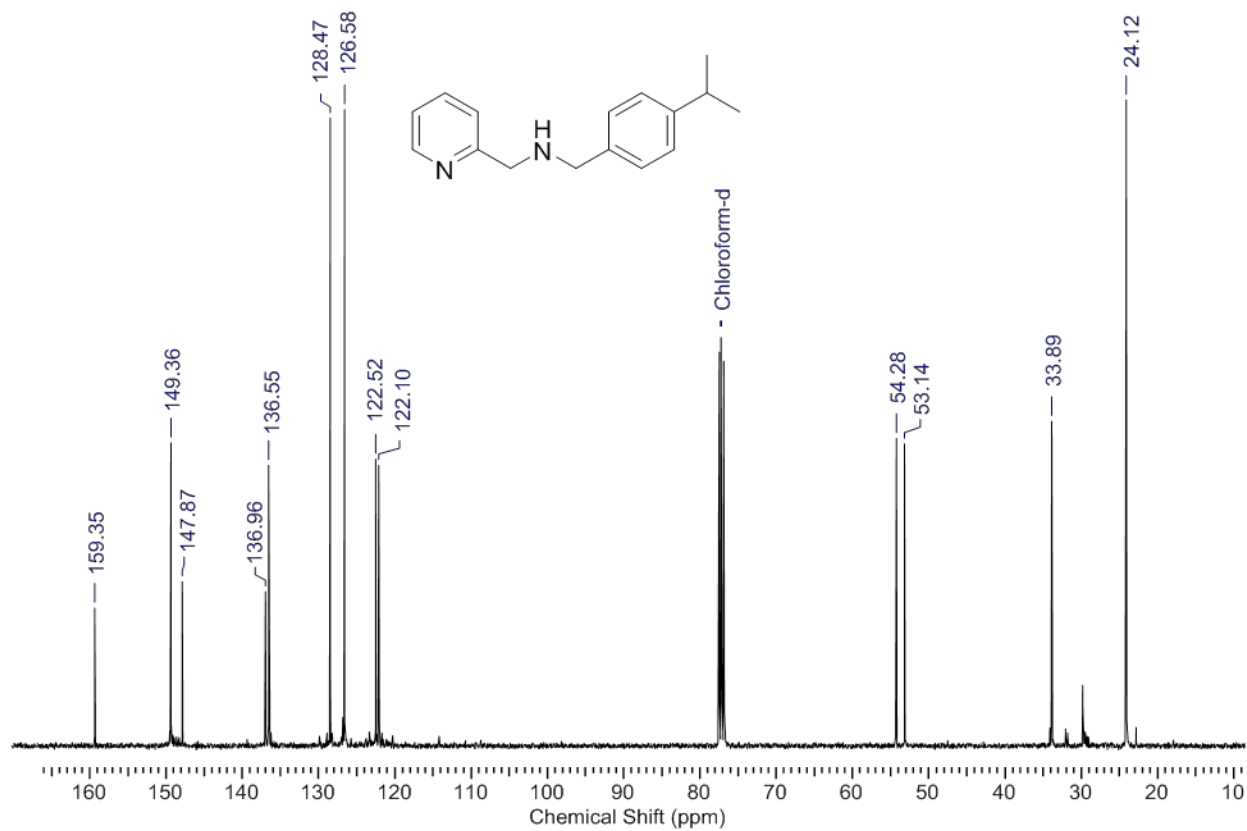

<sup>13</sup>C NMR (400 MHz, CDCl<sub>3</sub>): δ (ppm) = 159.4, 149.4, 147.9, 136.6, 128.5, 126.6, 122.5, 122.1, 54.3, 53.1, 33.9, 24.1

**Fig. S73.** <sup>13</sup>C NMR of N-(4-isopropylbenzyl)-1-(pyridin-2-yl)methanamine (Table 5, entry 5)



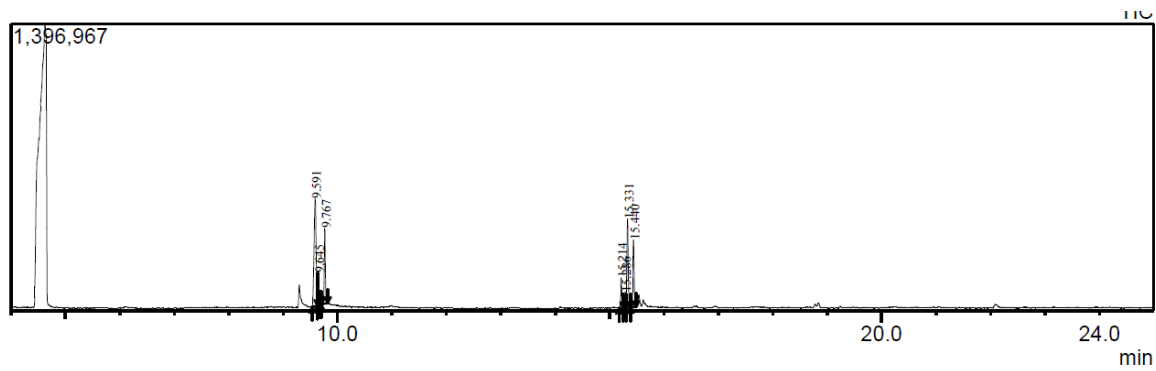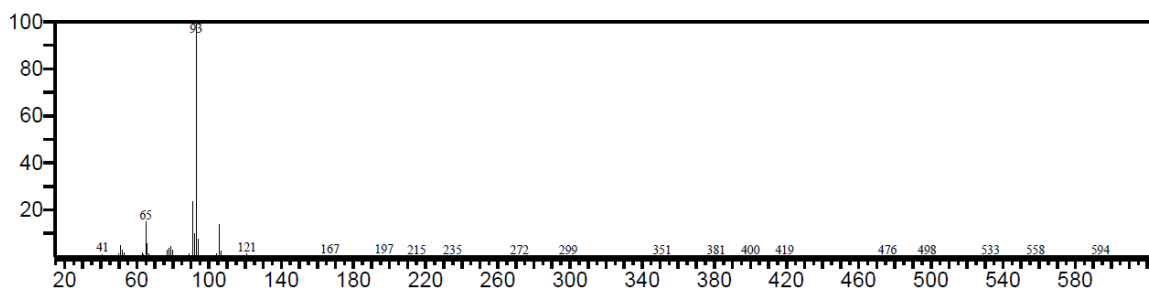

**Fig. S74.** Mercury Poisoning experiment of the standard reaction between benzyl alcohol and picolylamine

## X-ray Crystallography

Data were collected at 293 K using graphite-monochromated Mo K $\alpha$  ( $\lambda_{\alpha} = 0.71073 \text{ \AA}$ ). The data collection strategy was interpreted by employing the CrysAlisPro CCD software. The collection of data was done by the standard phi-omega scan techniques. The data were scaled and reduced employing CrysAlisPro RED. The direct methods using SHELXS-97 was used to solve the crystal structures and refined by the full matrix least squares method with SHELXL-97, refining on F<sup>2</sup>.<sup>3</sup> Olex-1.2 software was also used for structure solutions.<sup>4</sup> The H-atoms were placed at geometrically constrained positions and refined using isotropic temperature factors, generally 1.2 x  $U_{eq}$  of their parent atoms. All remaining non-hydrogen atoms were refined anisotropically. All the C–H $\cdots\pi$  interactions,<sup>5</sup> molecular drawings,<sup>6</sup> and mean plane analyses were obtained by Diamond (ver. 3.1d)<sup>7</sup> and Mercury (ver. 3.1)<sup>8</sup>.

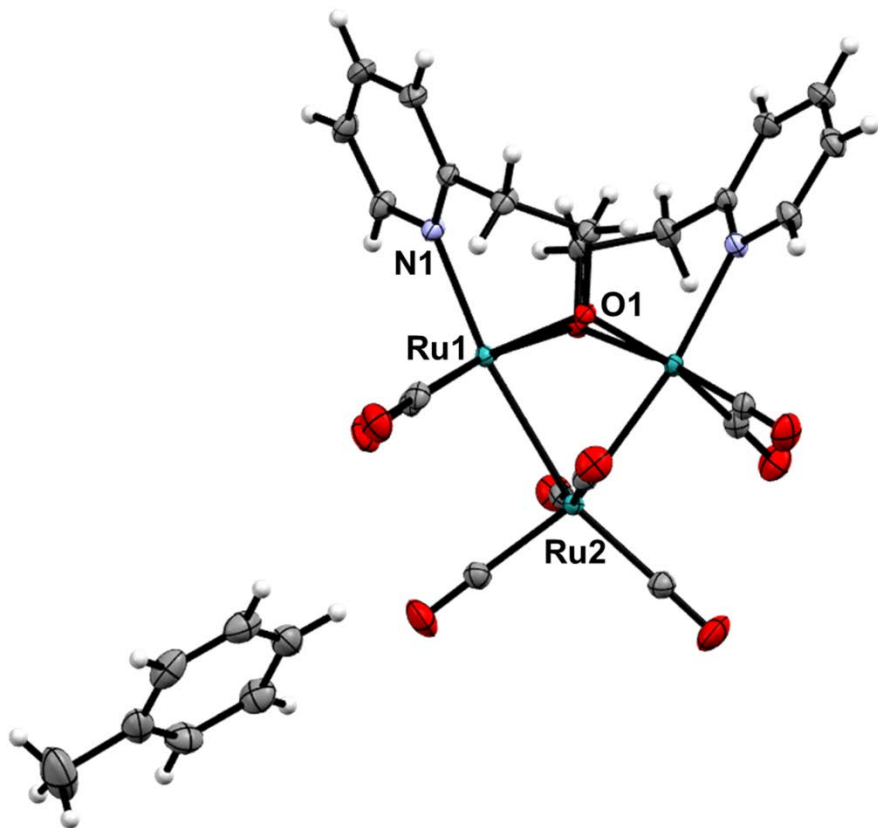

**Fig. S75.** Perspective view of 1a

**Table S5** Crystal data and structure refinement for **1a**

|                                                   |                                                                                |
|---------------------------------------------------|--------------------------------------------------------------------------------|
| <b>Identification code</b>                        | <b>1a</b>                                                                      |
| <b>Empirical formula</b>                          | C <sub>36</sub> H <sub>32</sub> N <sub>2</sub> O <sub>10</sub> Ru <sub>3</sub> |
| <b>Formula weight</b>                             | 955.84                                                                         |
| <b>Temperature/K</b>                              | 293                                                                            |
| <b>Crystal system</b>                             | monoclinic                                                                     |
| <b>Space group</b>                                | I <sub>2</sub> /a                                                              |
| <b>a/Å</b>                                        | 18.6183(4)                                                                     |
| <b>b/Å</b>                                        | 11.77089(19)                                                                   |
| <b>c/Å</b>                                        | 17.3349(2)                                                                     |
| <b>α/°</b>                                        | 90                                                                             |
| <b>β/°</b>                                        | 107.9232(17)                                                                   |
| <b>γ/°</b>                                        | 90                                                                             |
| <b>Volume/Å<sup>3</sup></b>                       | 3614.65(11)                                                                    |
| <b>Z</b>                                          | 4                                                                              |
| <b>ρ<sub>calc</sub> Mg/m<sup>3</sup></b>          | 1.756                                                                          |
| <b>μ/mm<sup>-1</sup></b>                          | 1.297                                                                          |
| <b>F(000)</b>                                     | 1896                                                                           |
| <b>Crystal size/mm<sup>3</sup></b>                | 0.31 × 0.3 × 0.29                                                              |
| <b>Radiation</b>                                  | Mo Kα (λ = 0.71073)                                                            |
| <b>2θ range for data collection/°</b>             | 2.944 to 32.347                                                                |
| <b>Index ranges</b>                               | -23 ≤ h ≤ 26, -16 ≤ k ≤ 16,<br>-24 ≤ l ≤ 25                                    |
| <b>Reflections collected</b>                      | 12688                                                                          |
| <b>Refinement method</b>                          | Full-matrix least-squares on F <sup>2</sup>                                    |
| <b>Independent reflections</b>                    | 5279 [R <sub>int</sub> = 0.0219,<br>R <sub>sigma</sub> = 0.0226]               |
| <b>Data/restraints/parameters</b>                 | 5279/0/232                                                                     |
| <b>Goodness-of-fit on F<sup>2</sup></b>           | 1.052                                                                          |
| <b>Final R indexes [I ≥ 2σ (I)]</b>               | R1 = 0.0255, wR2 = 0.0650                                                      |
| <b>Final R indexes [all data]</b>                 | R1 = 0.0268, wR2 = 0.0661                                                      |
| <b>Largest diff. peak/hole / e Å<sup>-3</sup></b> | 0.939/-1.421                                                                   |
| <b>CCDC No.</b>                                   | 1539165                                                                        |

## References

1. A. K. Saini, K. Natarajan and S. M. Mobin, *Chem. Commun.*, 2017, **53**, 9870-9873.
2. A. Chaudhary, A. Mohammad and S. M. Mobin, *Cryst. Growth Des.*, 2017, **17**, 2893-2910.
3. G. M. Sheldrick, *Acta Crystallogr., Sect. C: Struct. Chem.*, 2015, **71**, 3-8.
4. O. V. Dolomanov, L. J. Bourhis, R. J. Gildea, J. A. K. Howard and H. Puschmann, *J. Appl. Crystallogr.*, 2009, **42**, 339-341.
5. Y. V. Torubaev, K. A. Lyssenko, P. Y. Barzilovich, G. A. Saratov, M. M. Shaikh, A. Singh and P. Mathur, *CrystEngComm*, 2017, **19**, 5114-5121.
6. A. Singh, P. Kumari, A. Raghuvanshi, S. M. Mobin and P. Mathur, *Appl. Organomet. Chem*, 2018, **32**, DOI: 10.1002/aoc.4071.
7. K. B. G. H. Putz., Kreuzherrenstr. 102, 53227 Bonn, Germany, and <http://www.crystalimpact.com/diamond>.
8. C. F. Macrae, P. R. Edgington, P. McCabe, E. Pidcock, G. P. Shields, R. Taylor, M. Towler and J. v. d. Streek, *J. Appl. Cryst.*, , 2006, **39**, 453-457.
